# Supplementary material for: Sctensor detects many-to-many cell–cell interactions from single cell RNA-sequencing data
Source: Springer Nature journal article supplement (doi:10.1186/s12859-023-05490-y), 2023-11-07

# Simulated Datasets

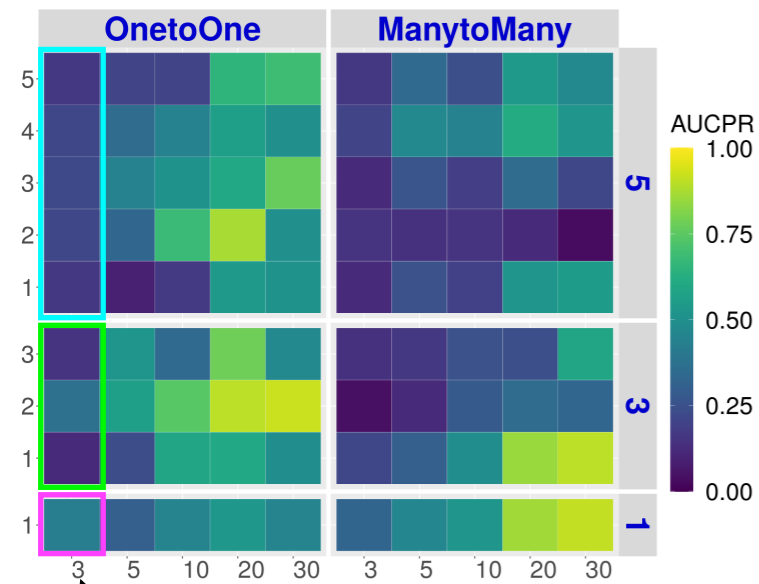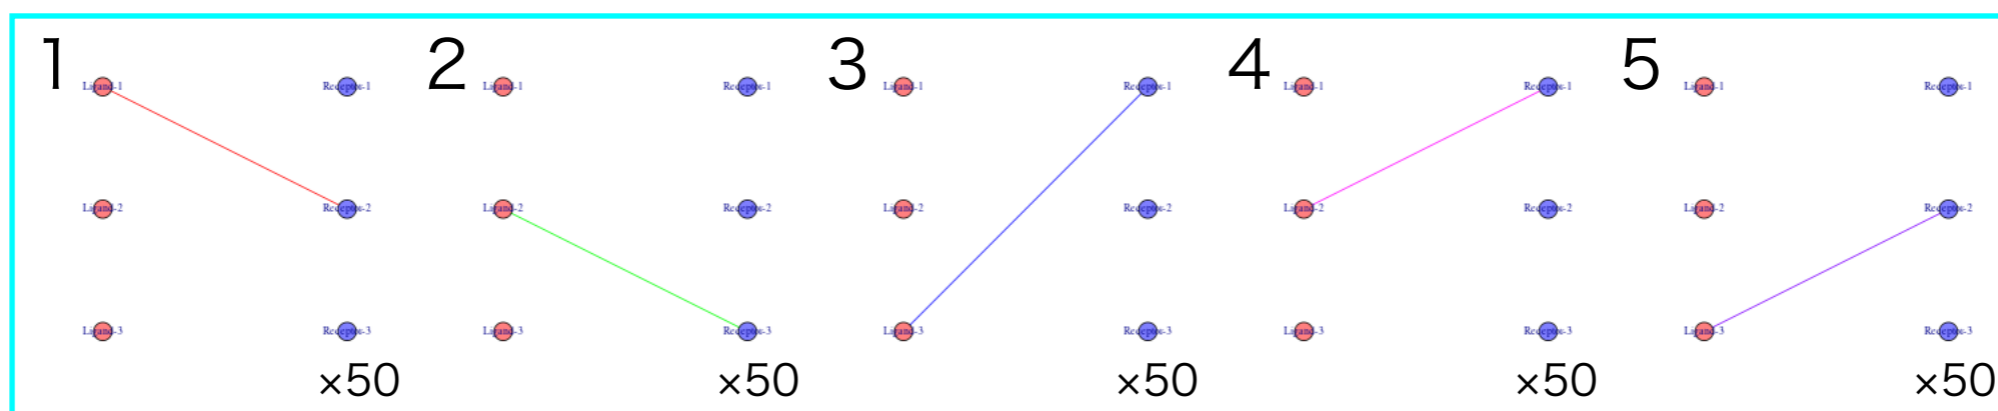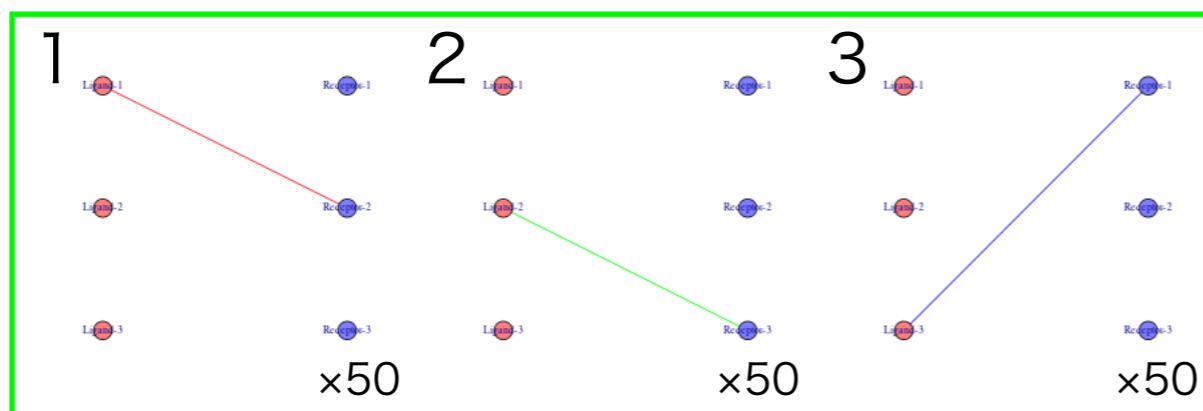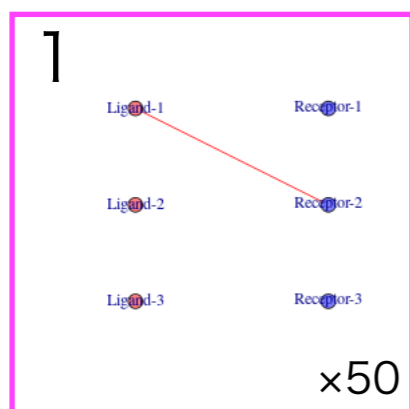

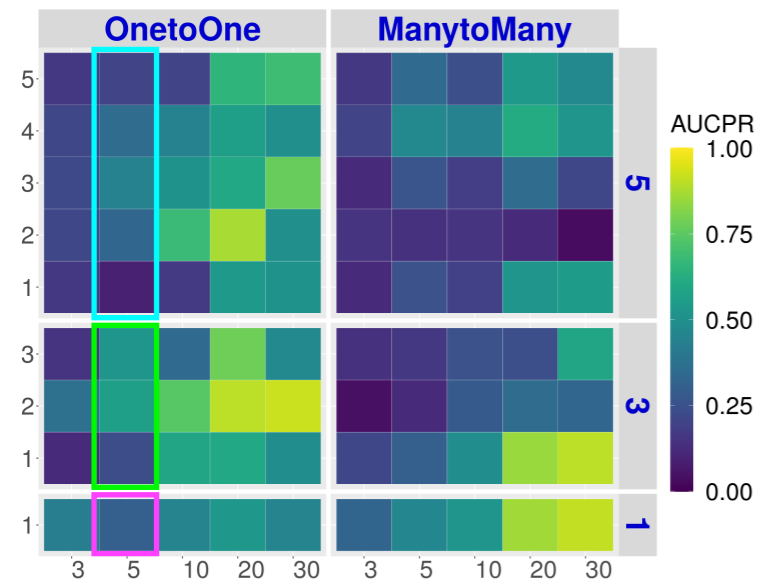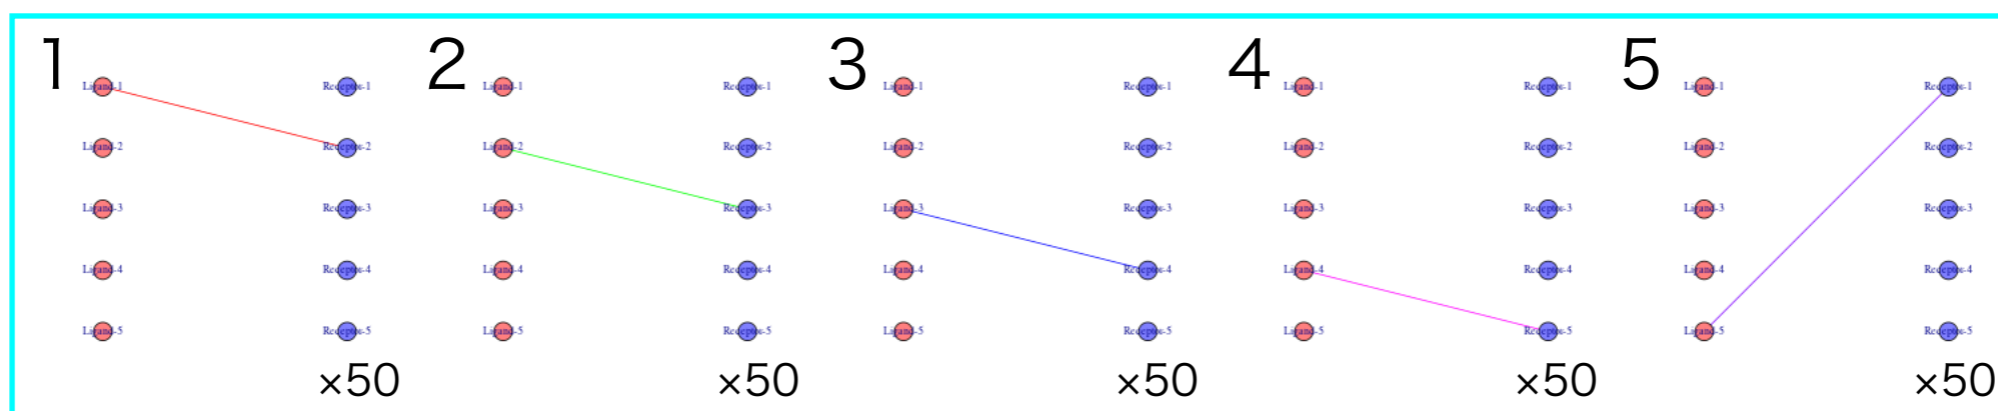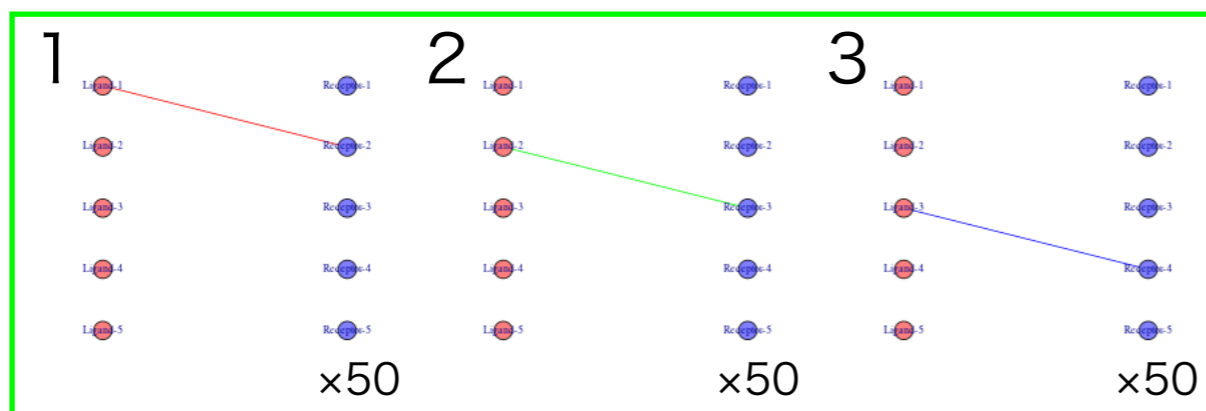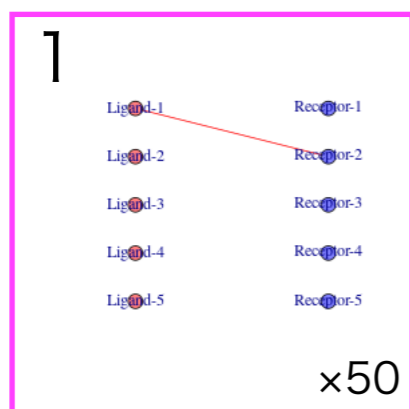

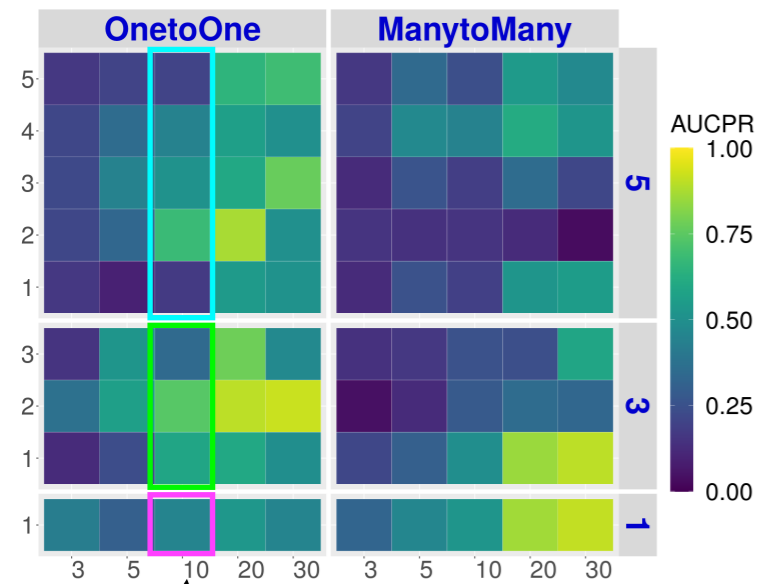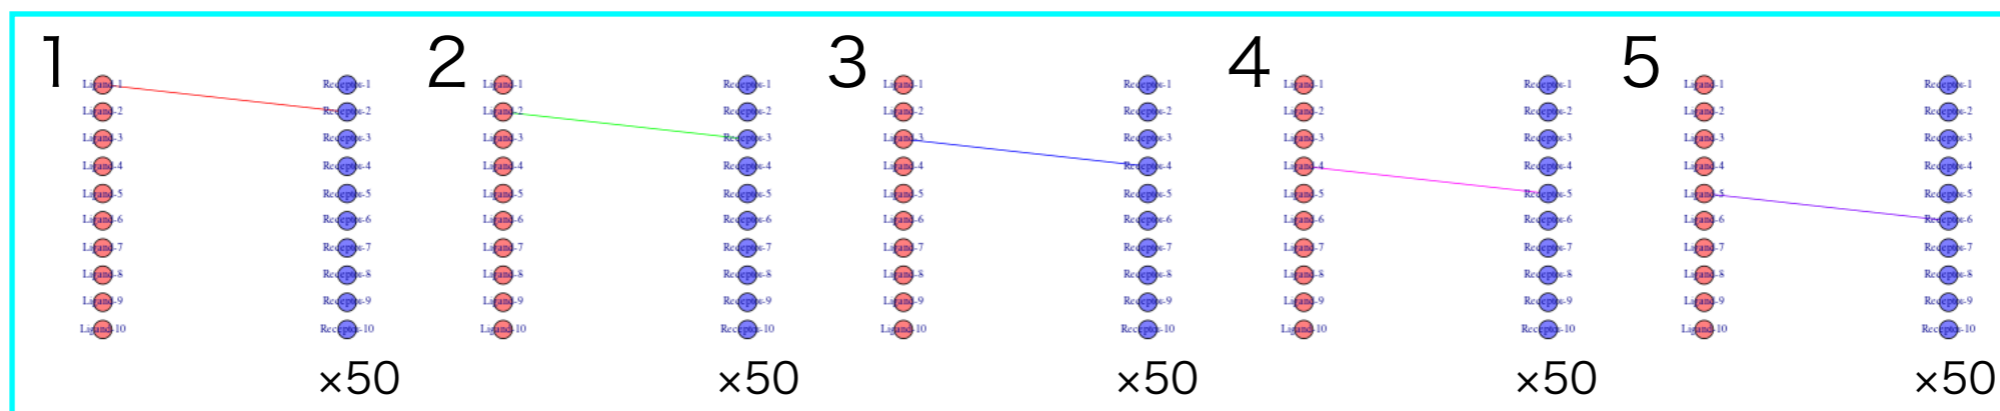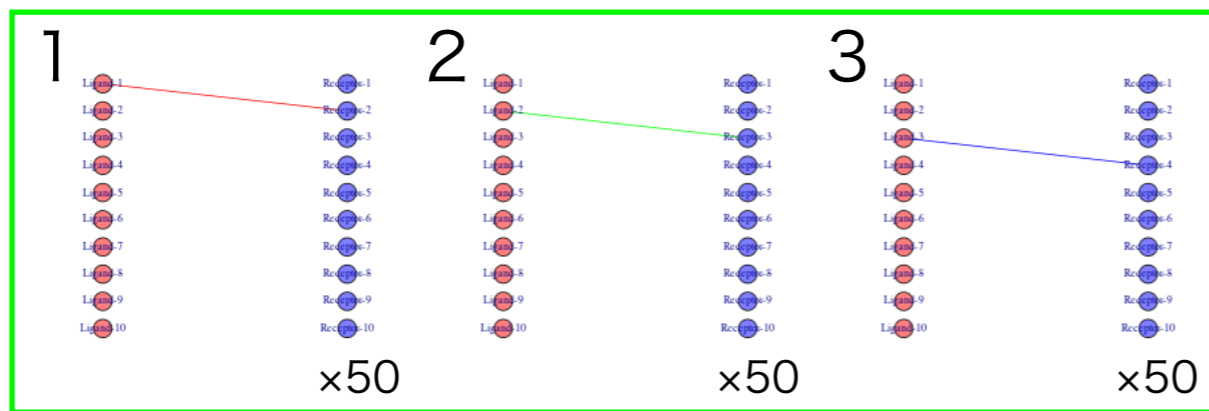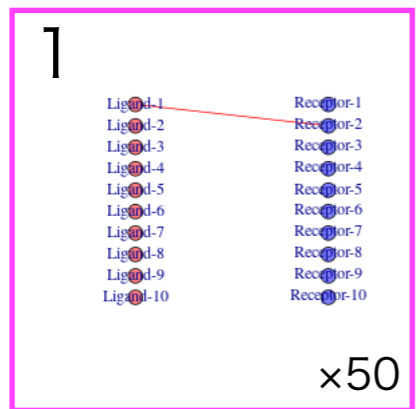

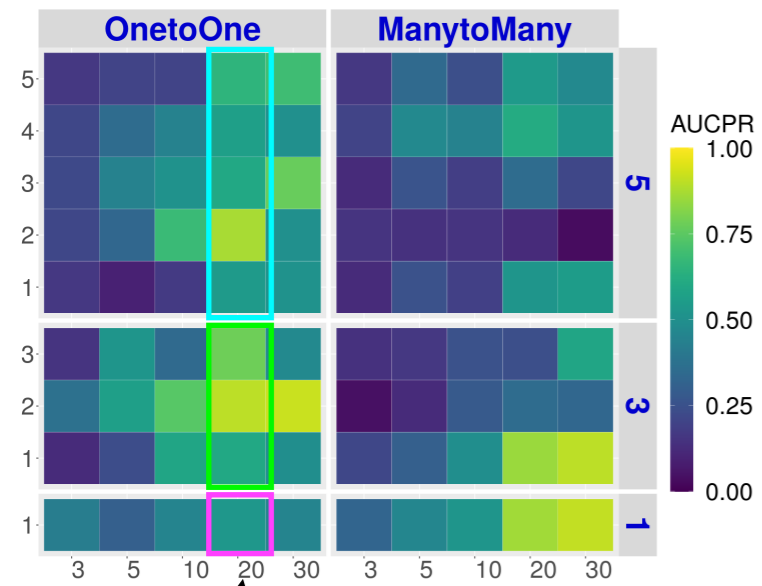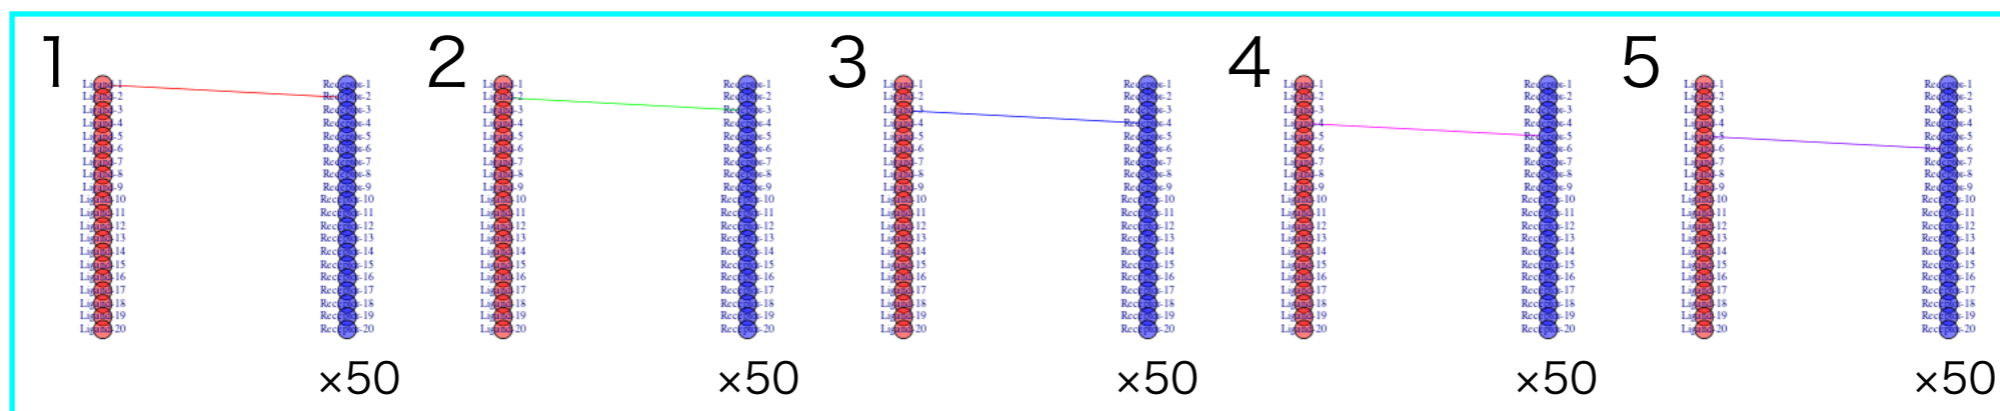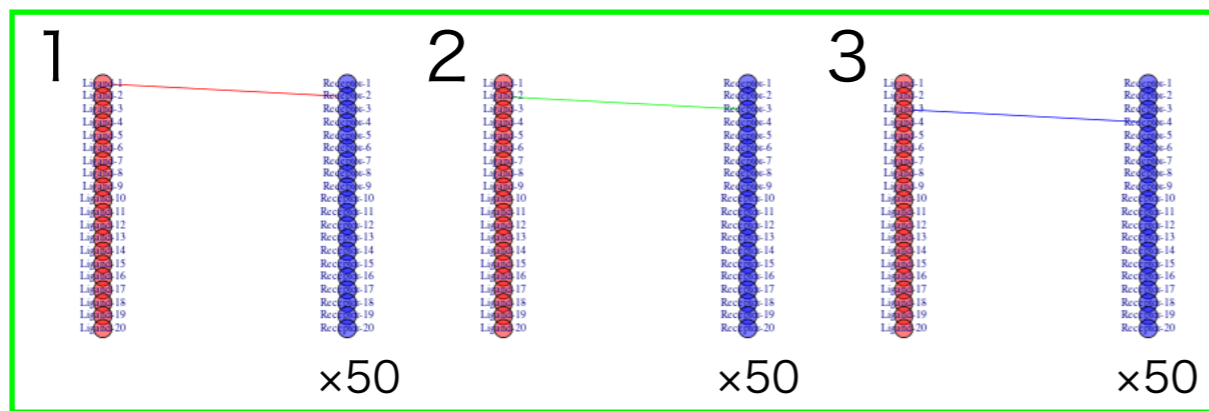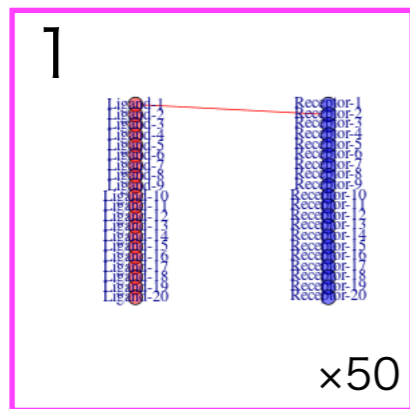

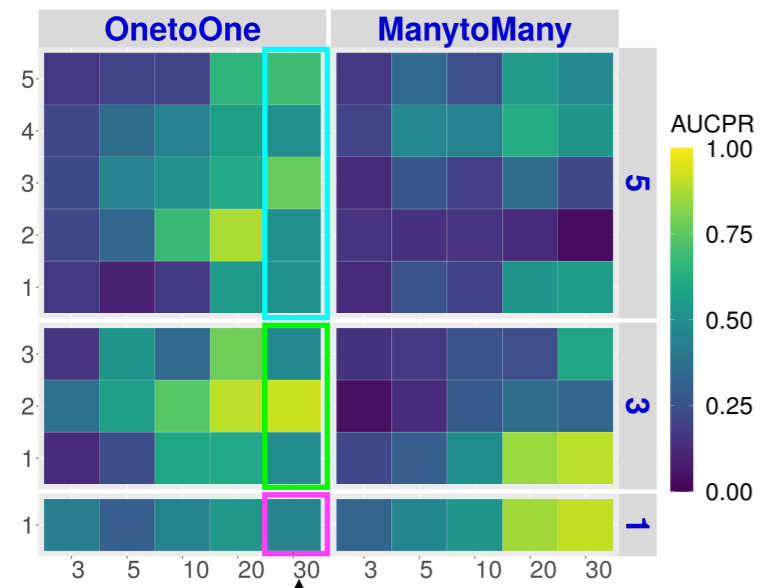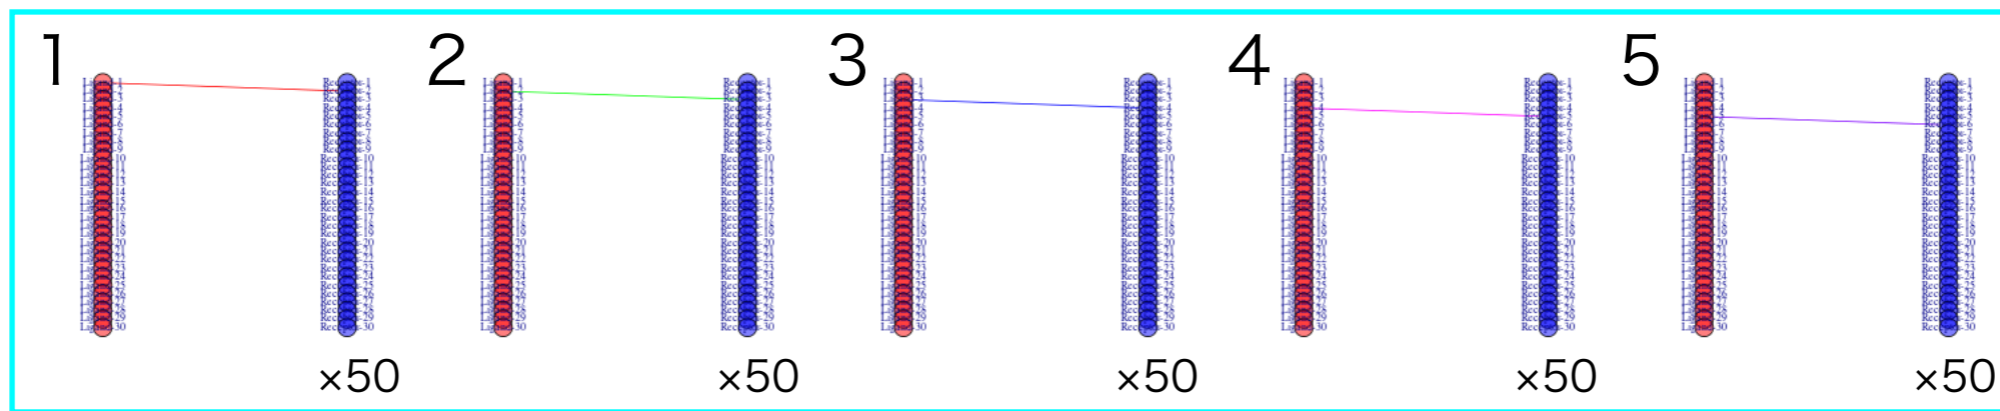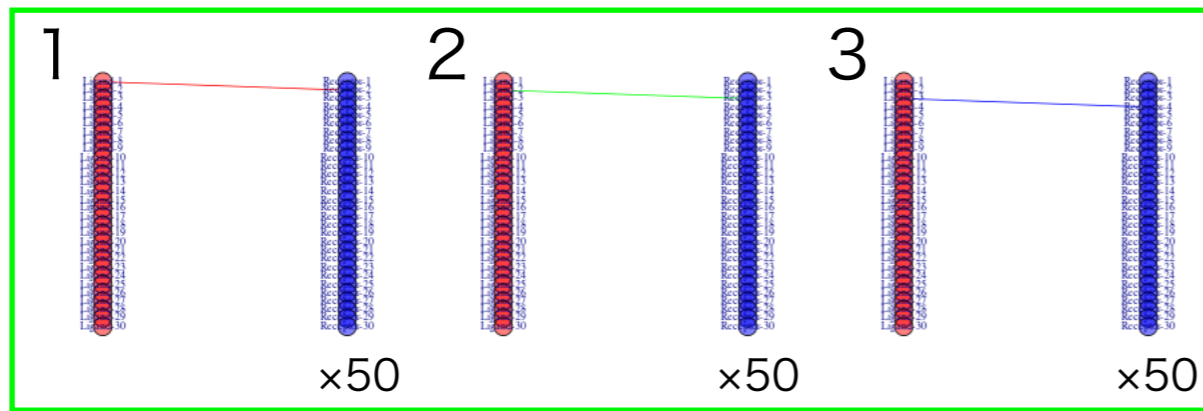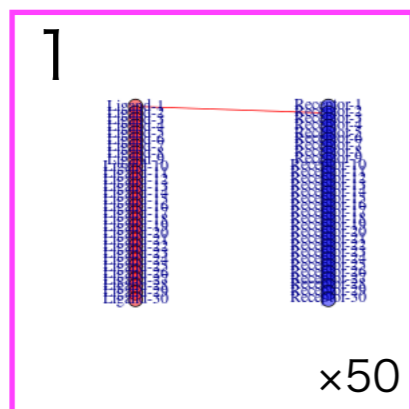

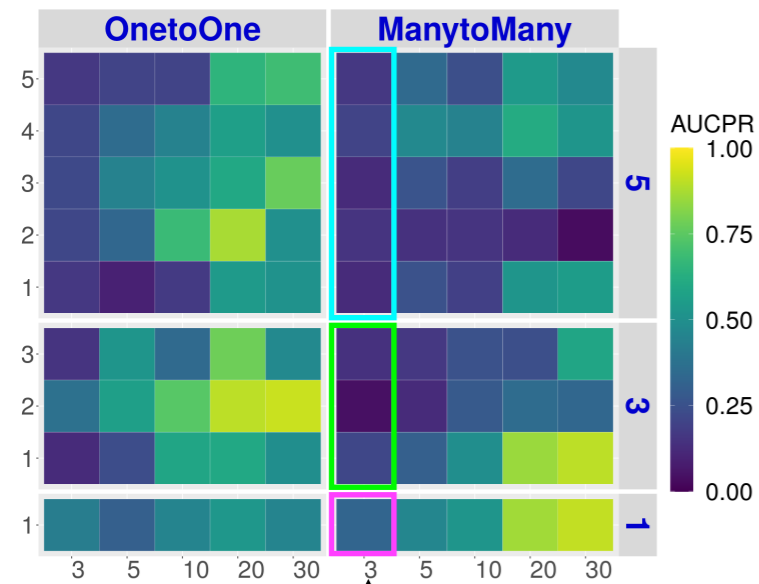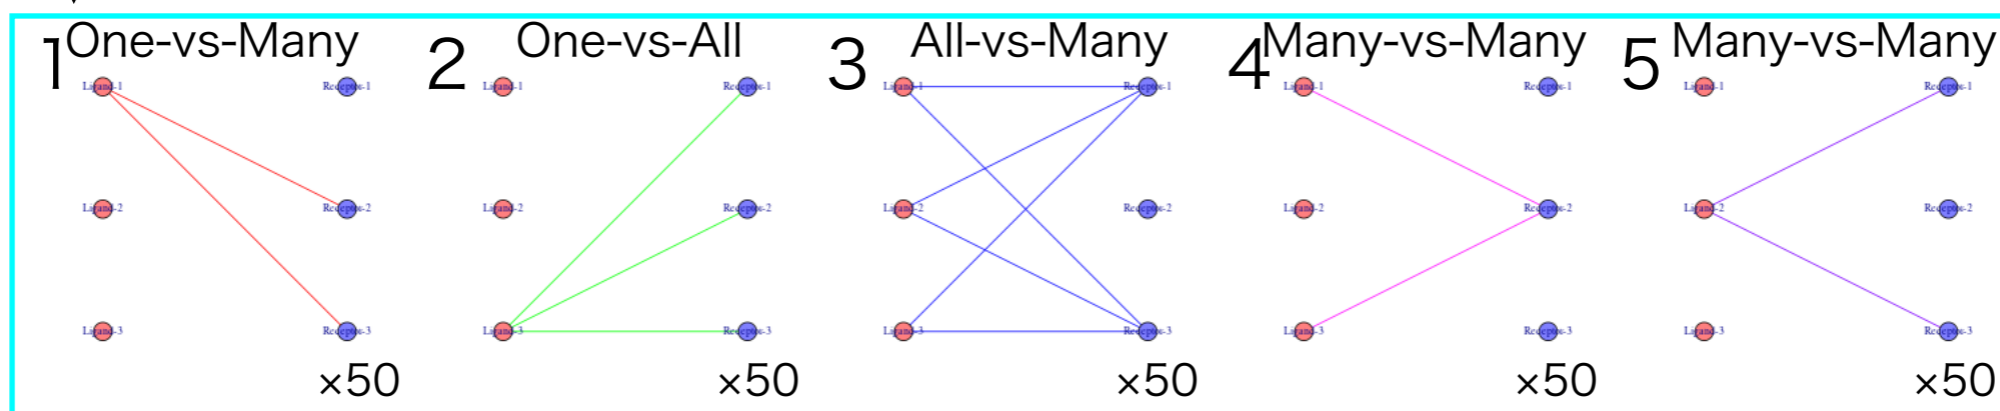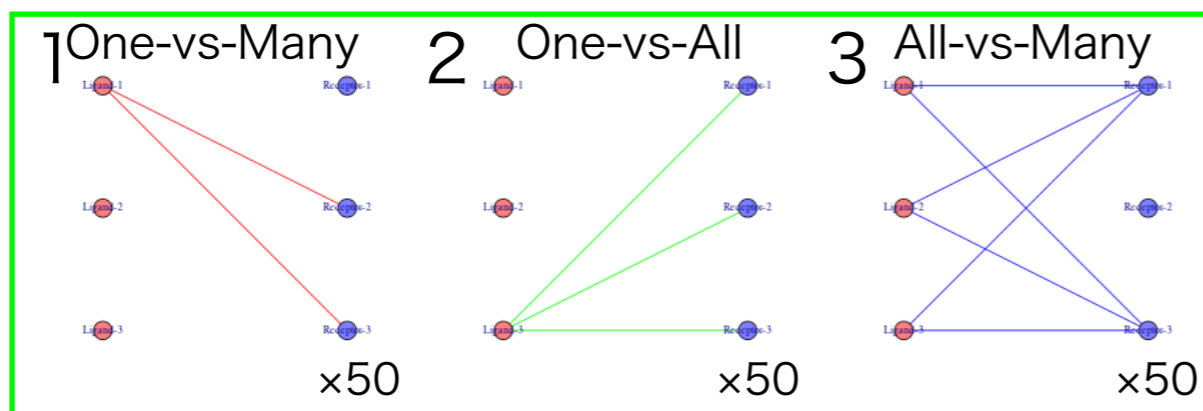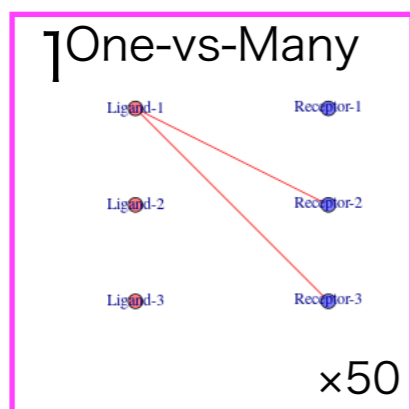

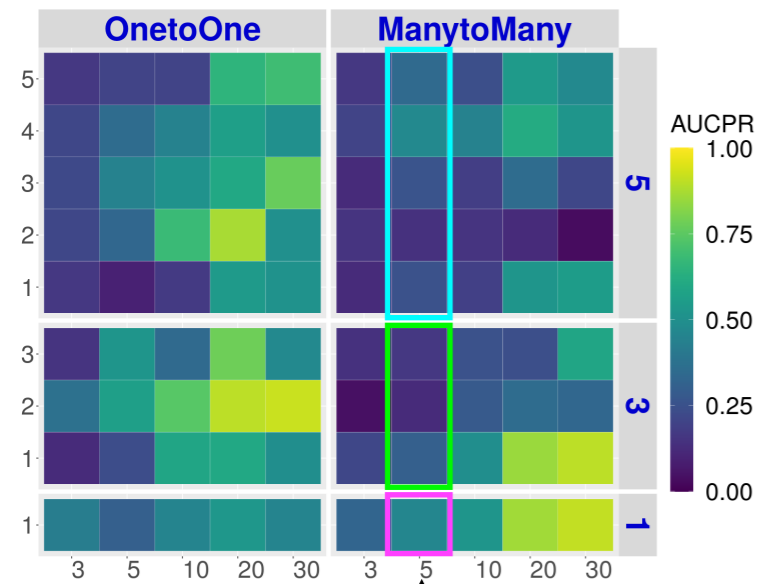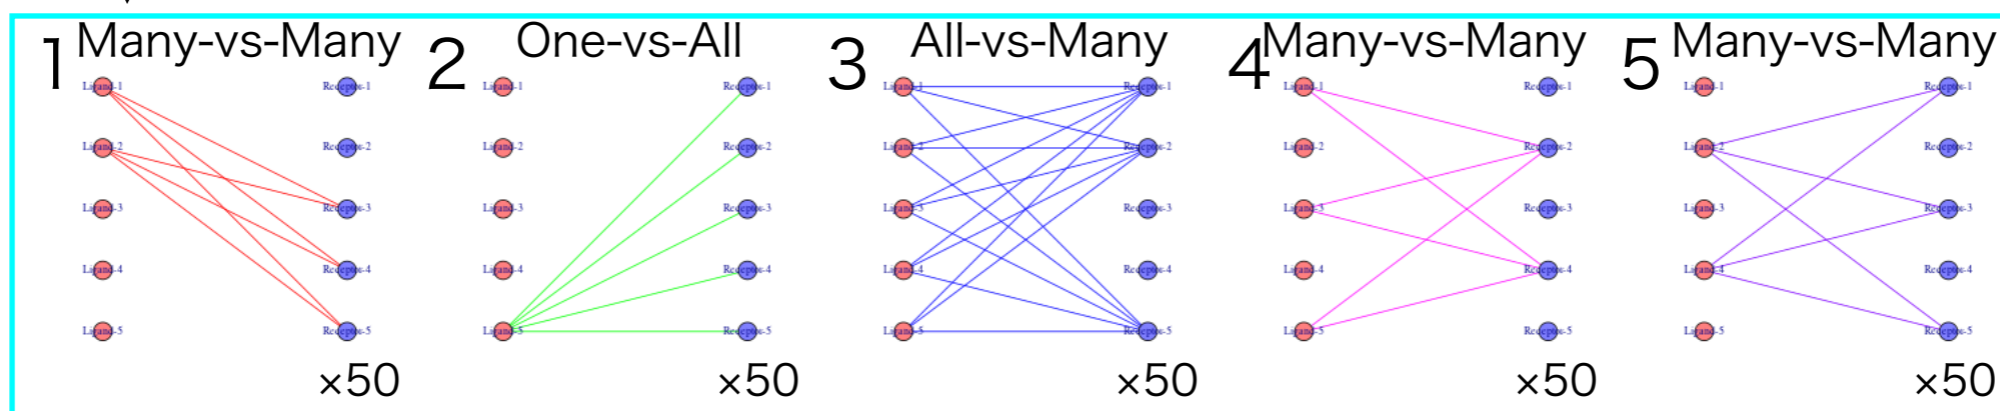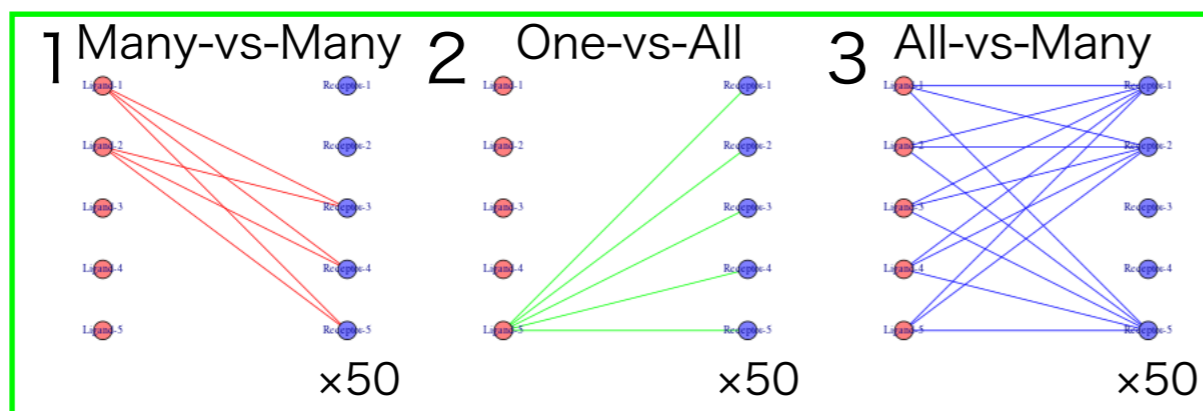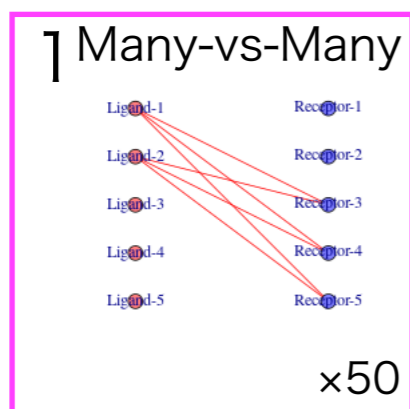



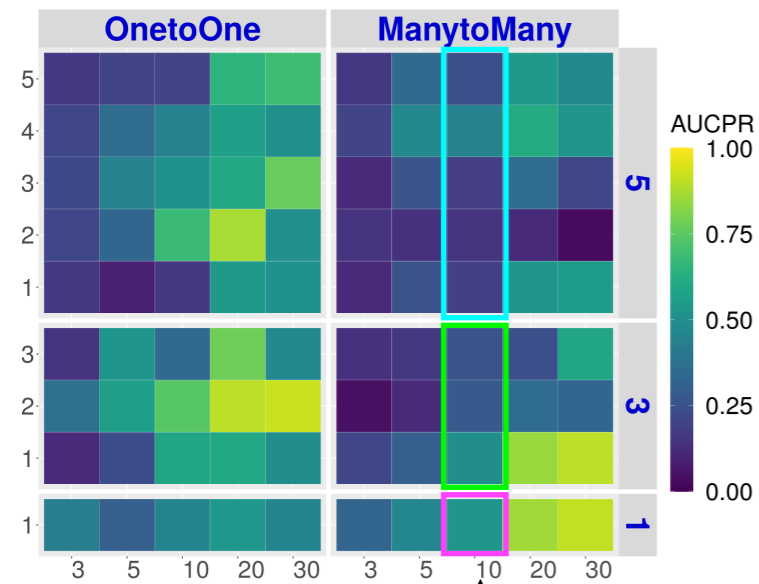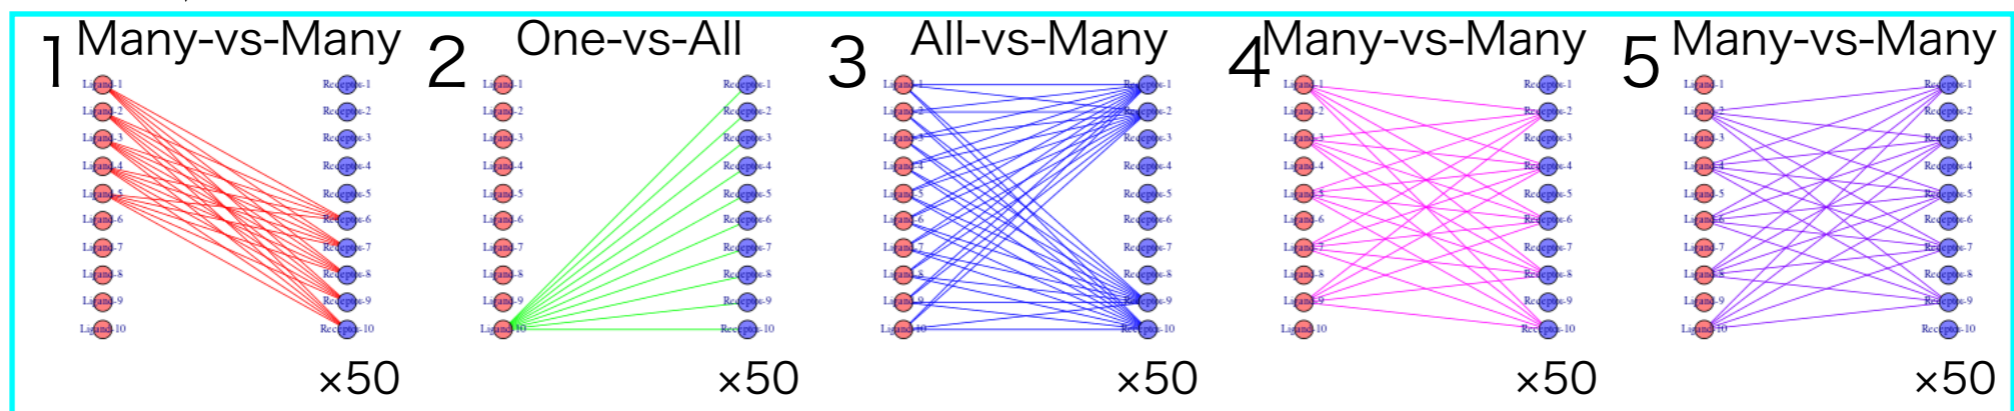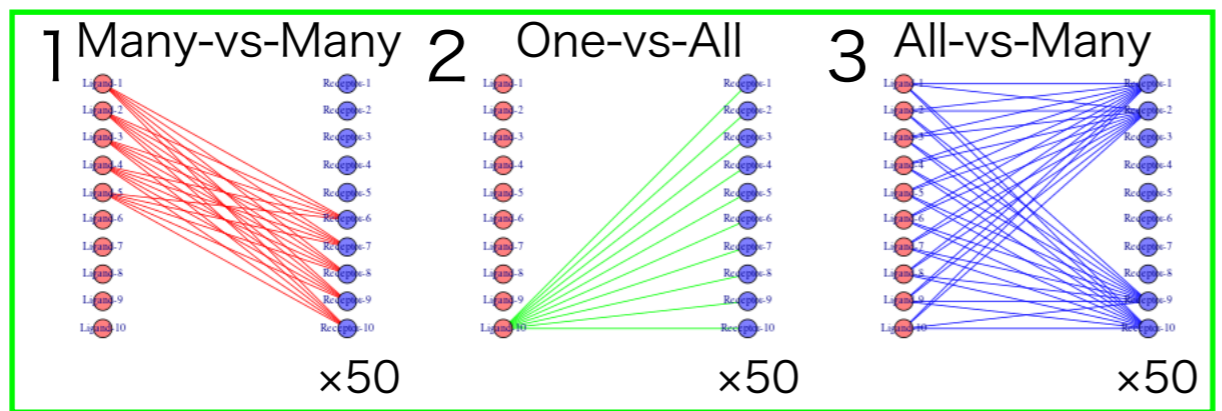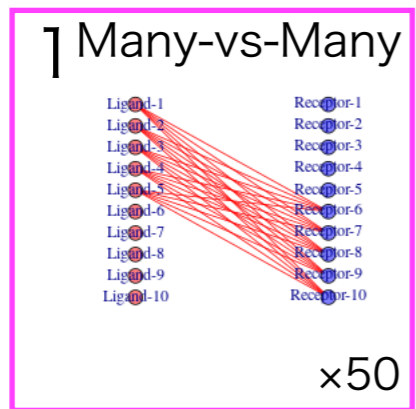

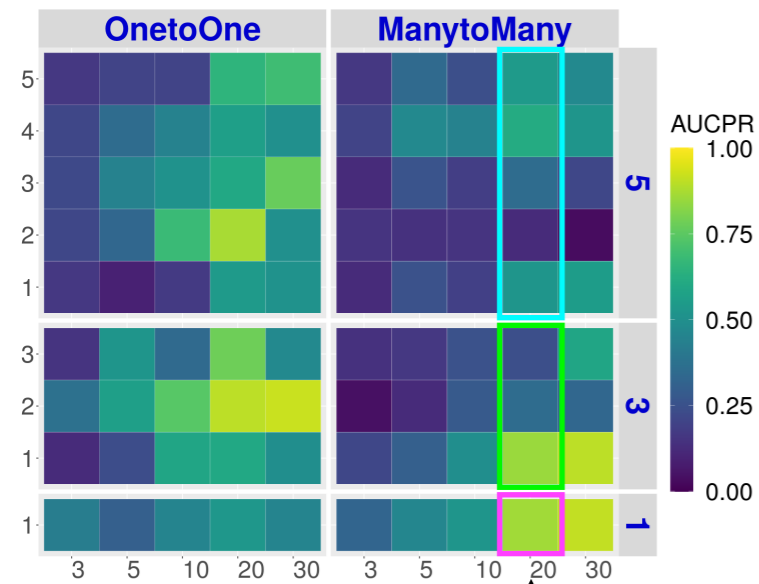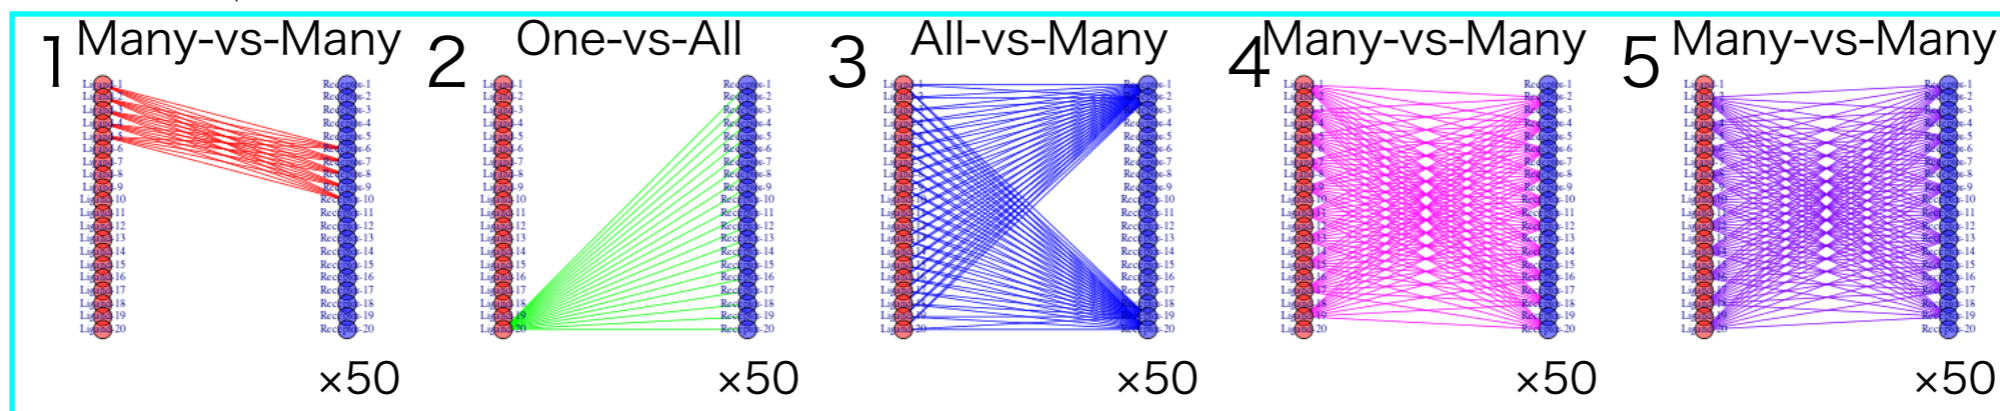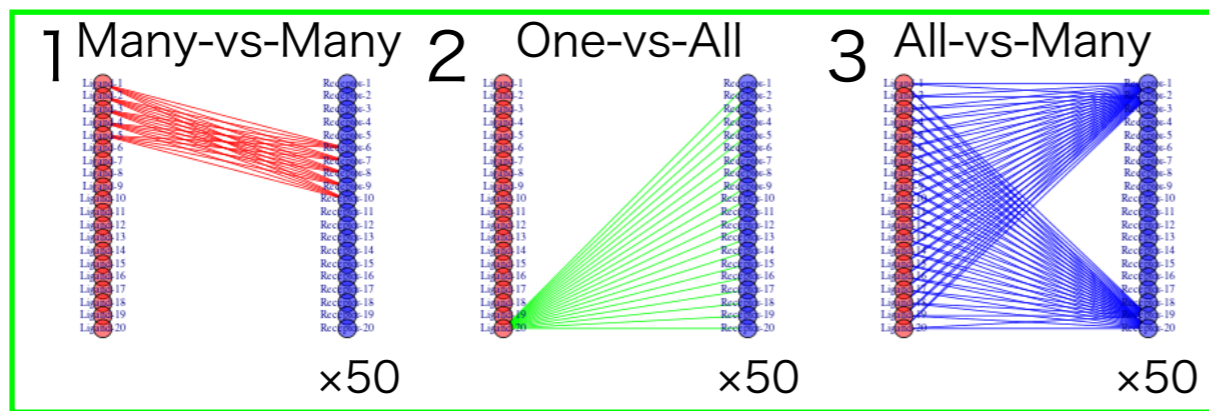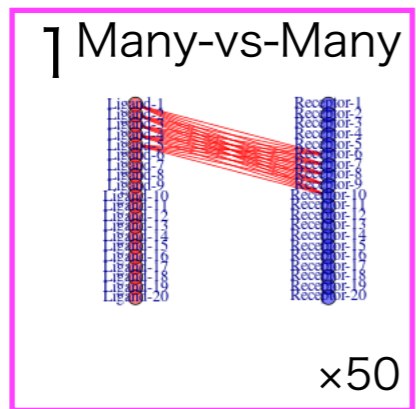

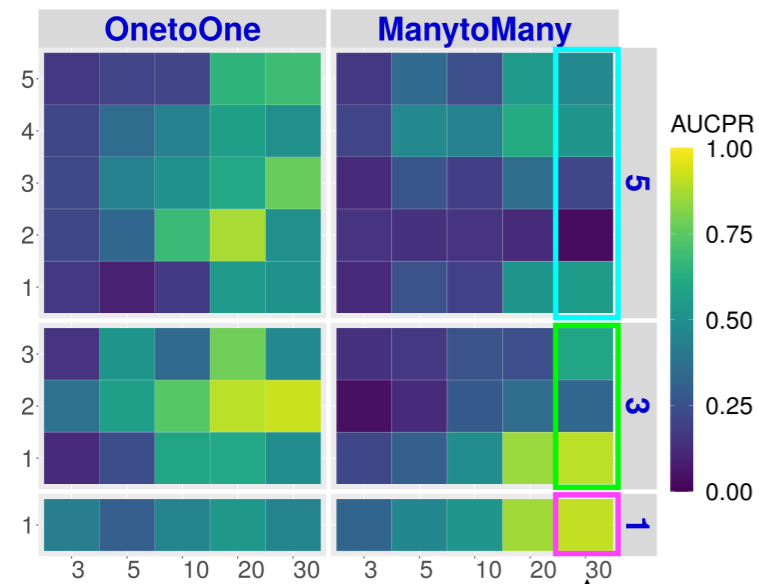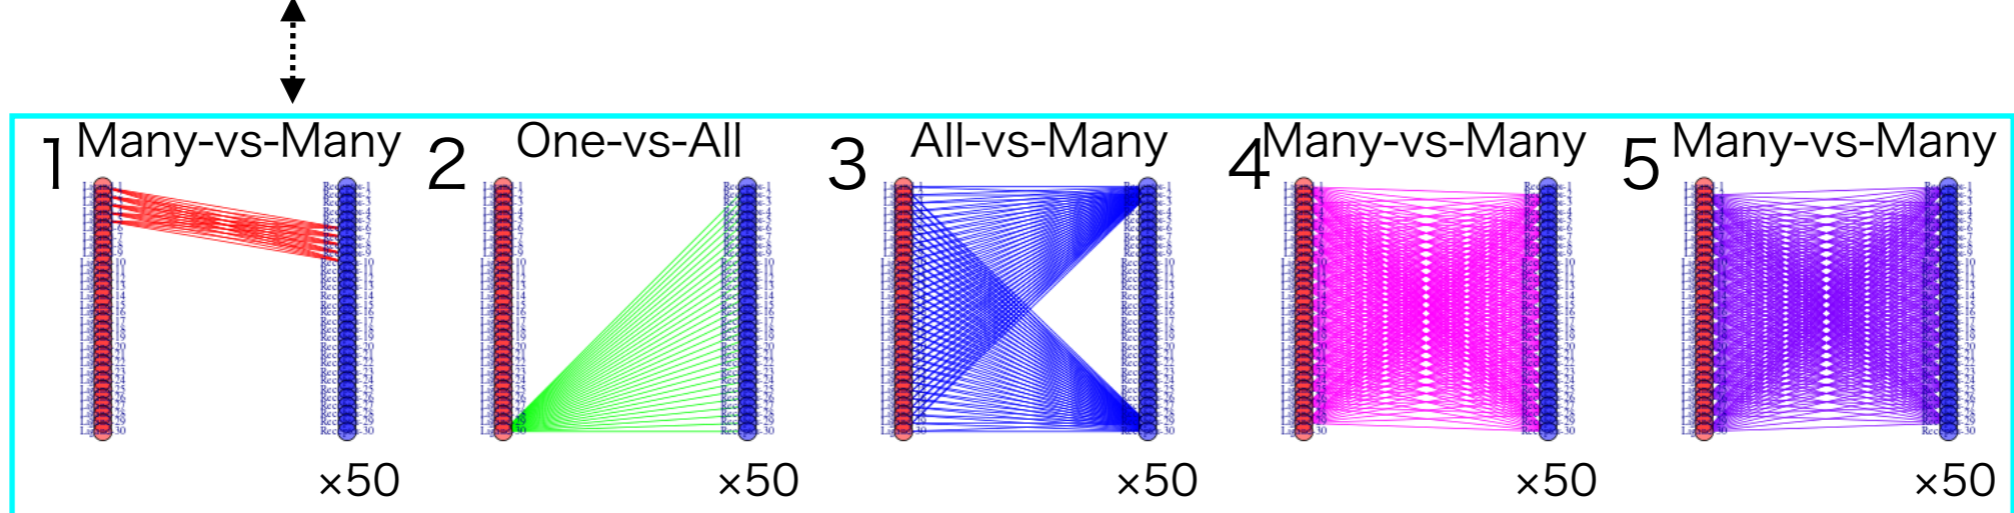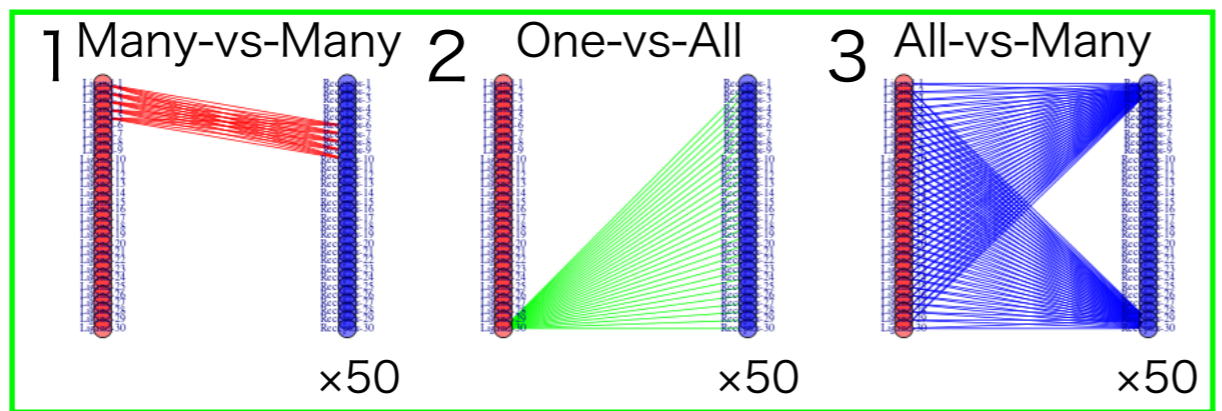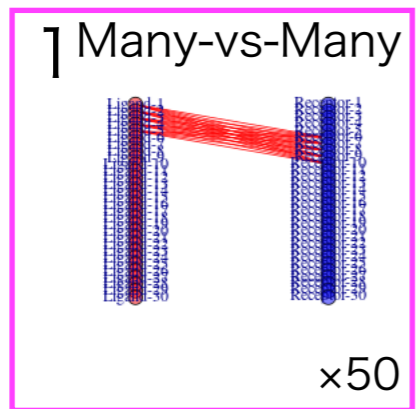

# Real Datasets

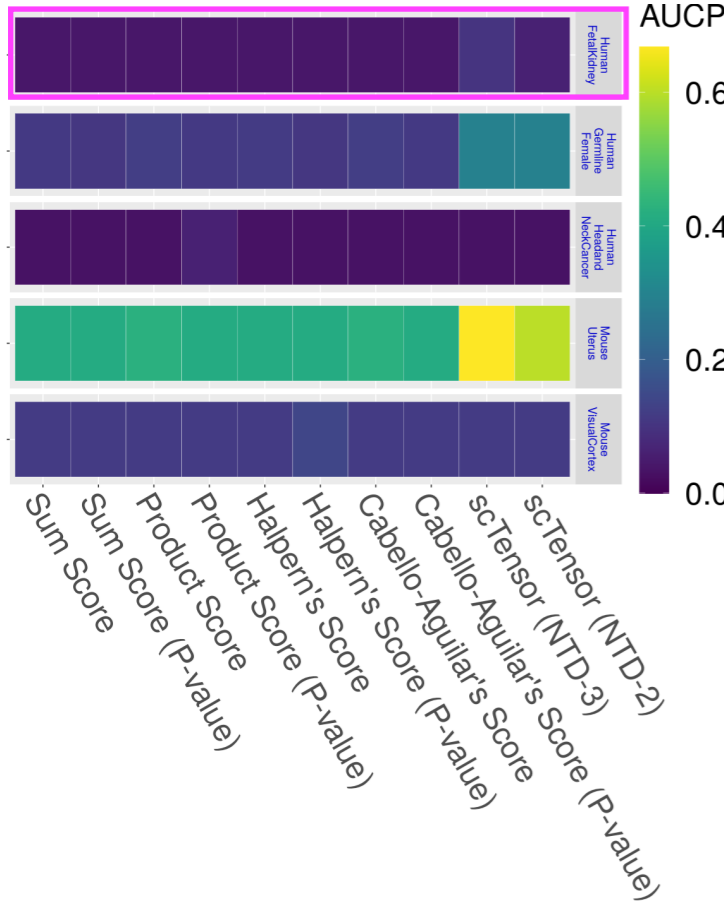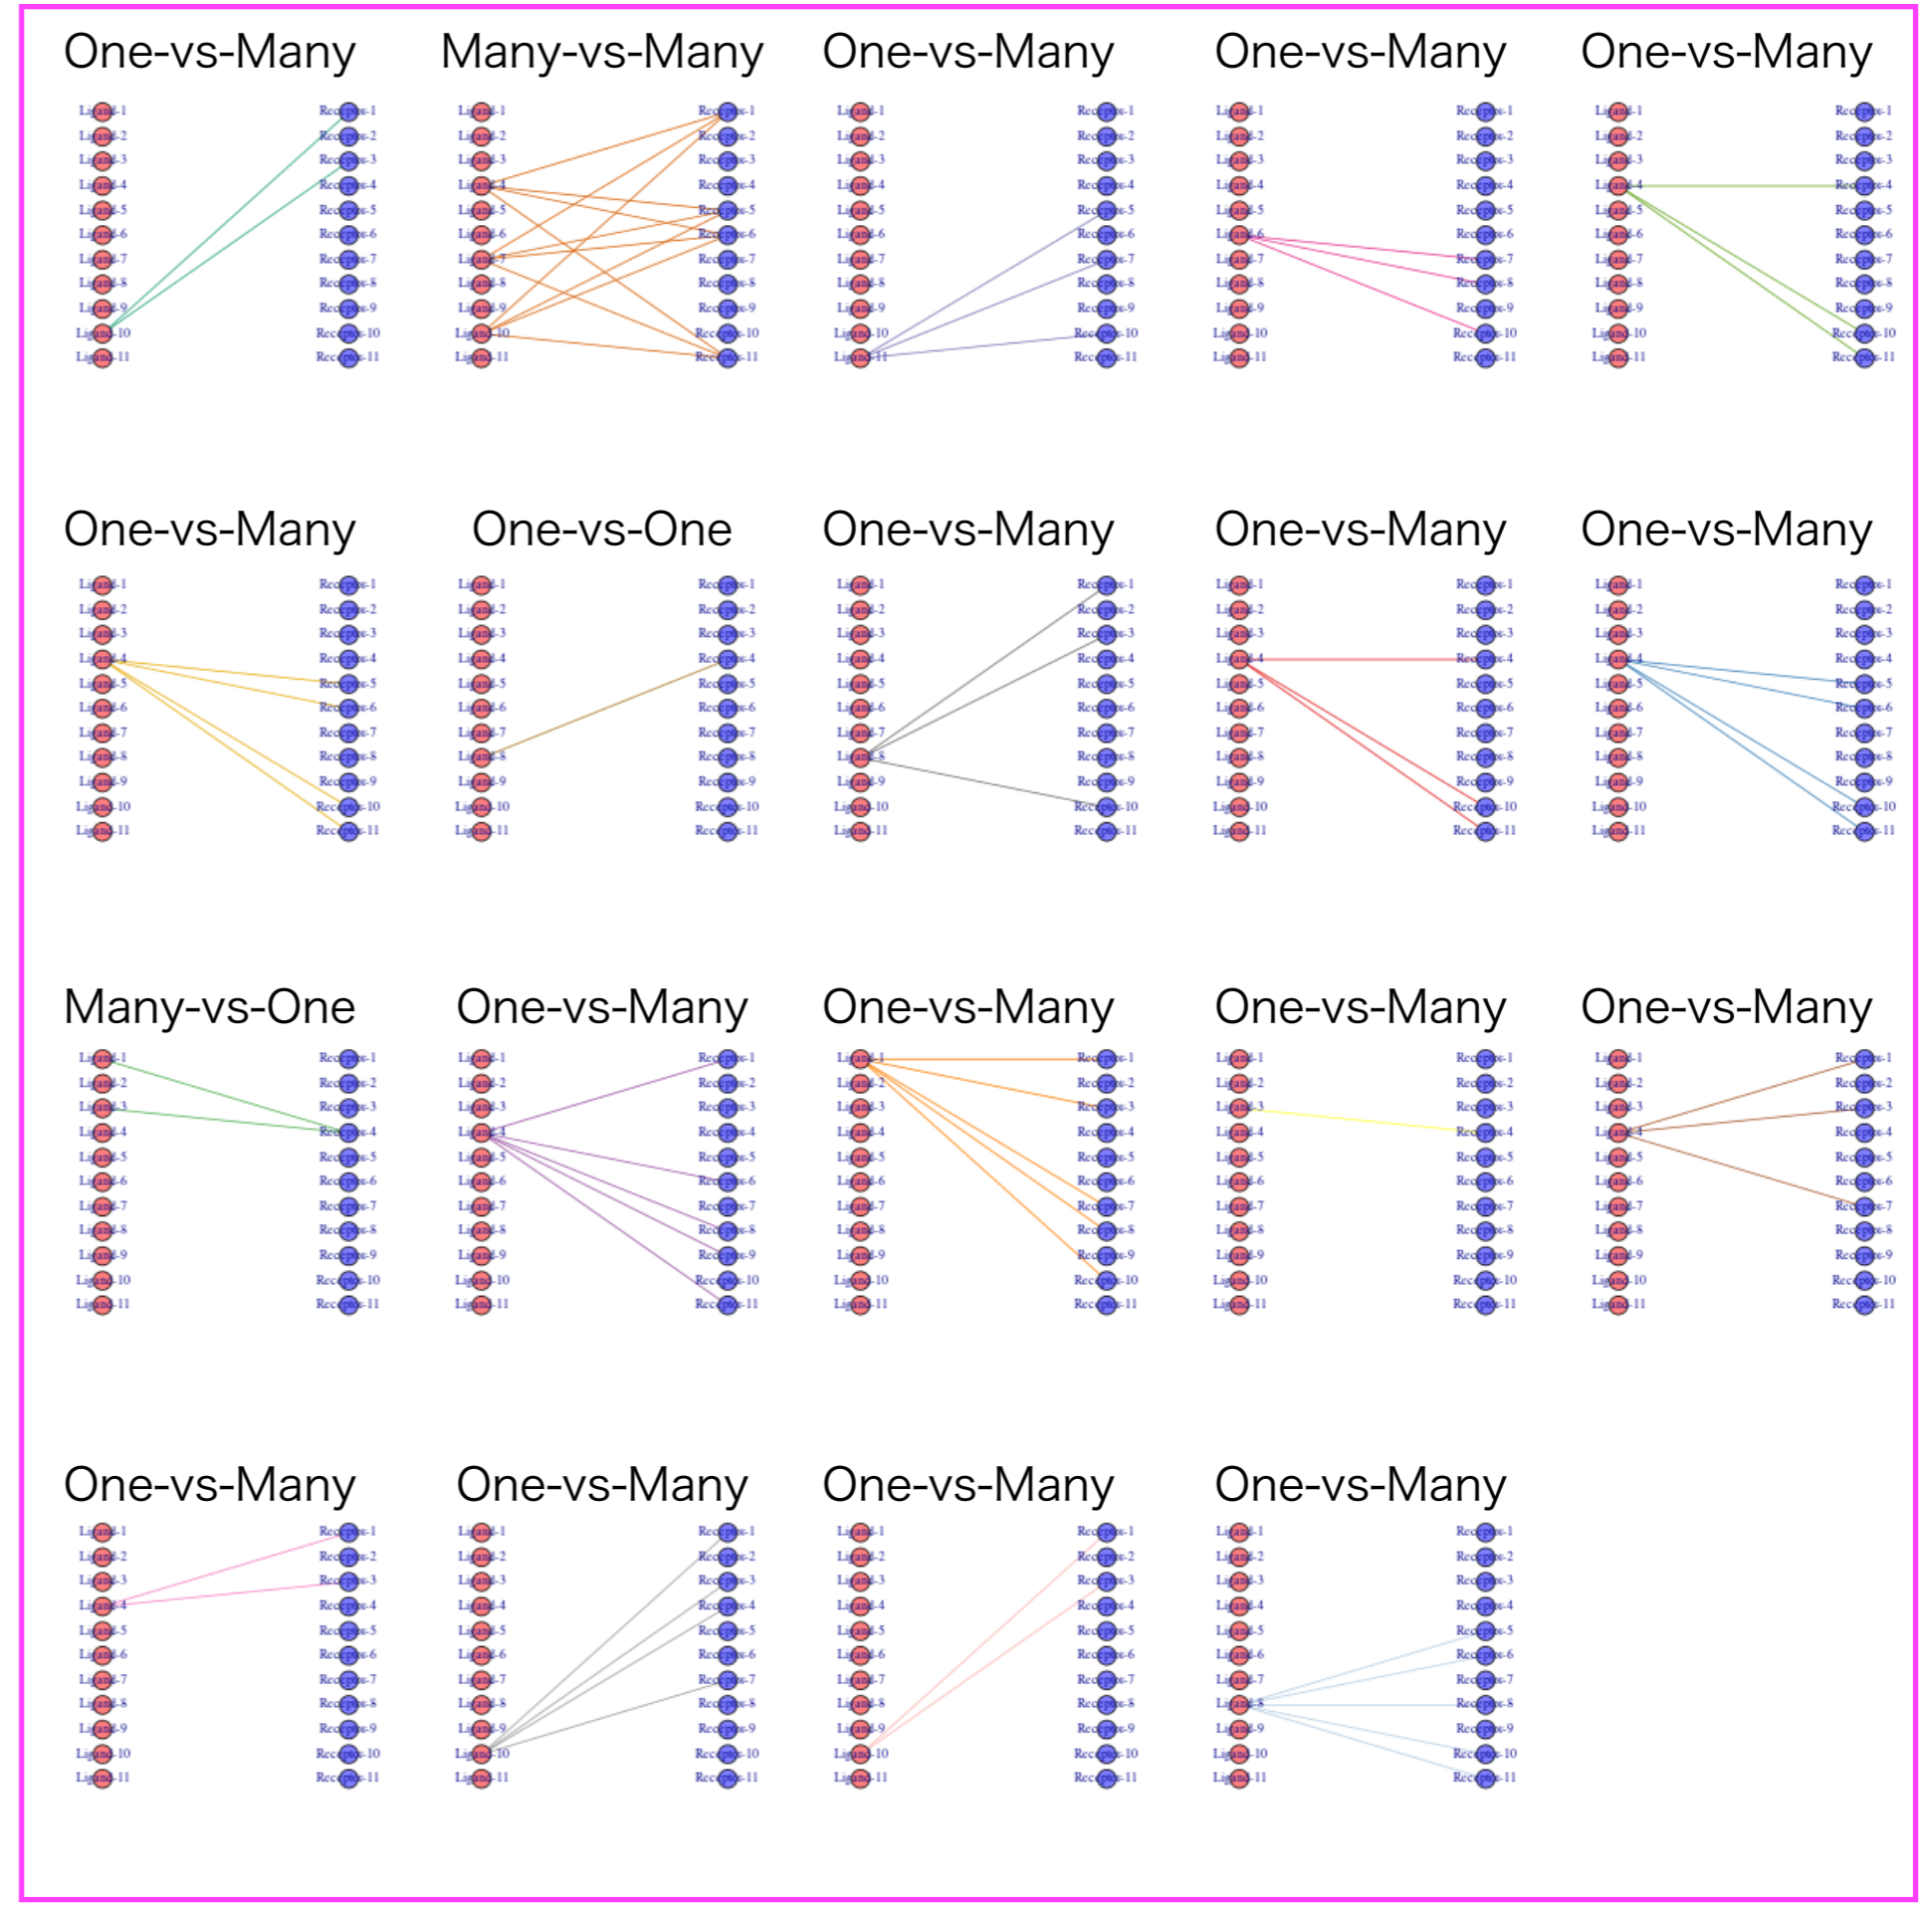



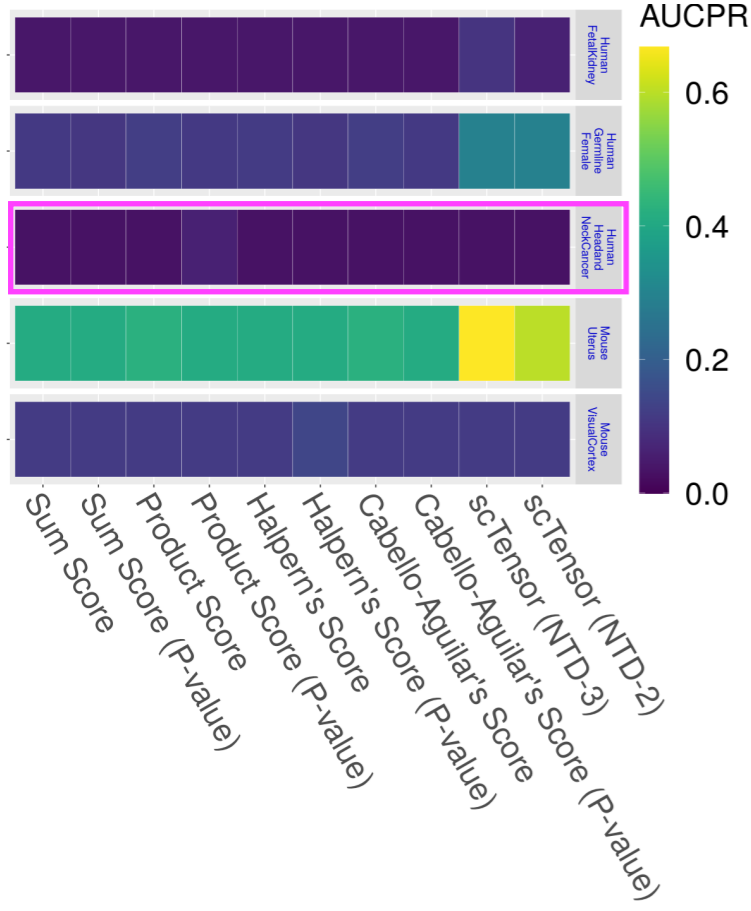

One-vs-Many

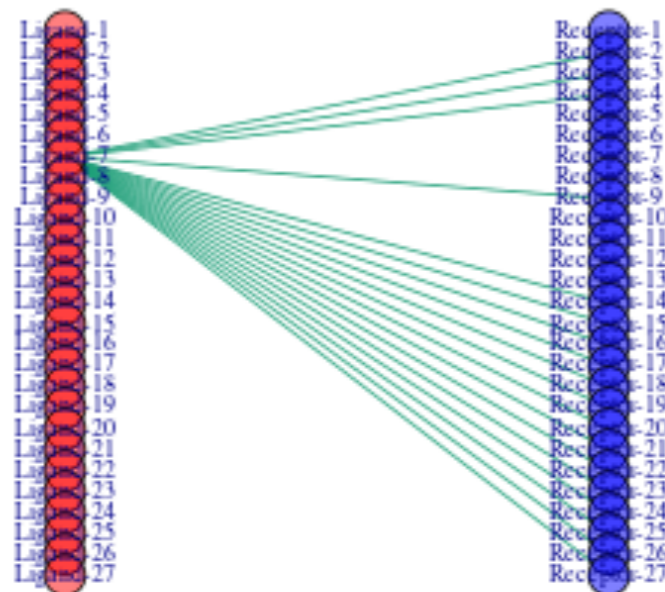

One-vs-Many

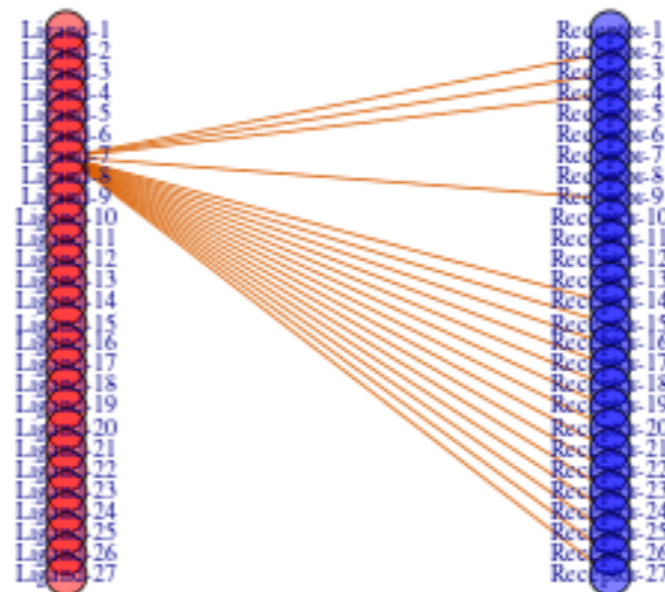

One-vs-Many

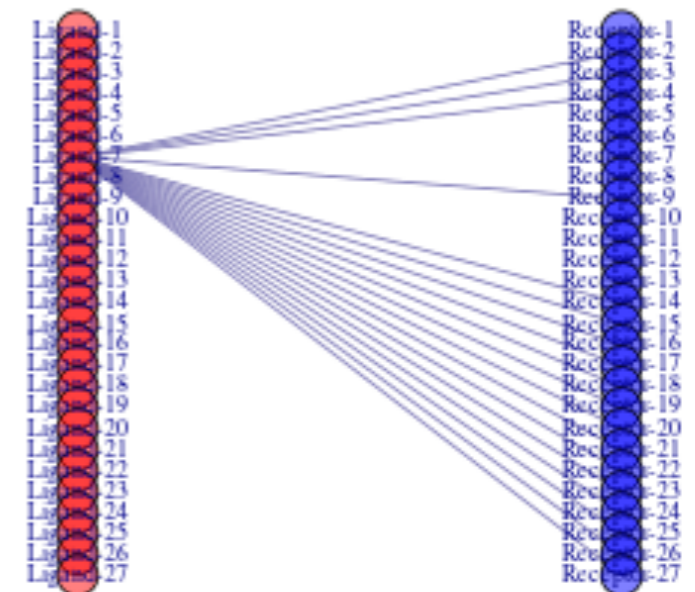

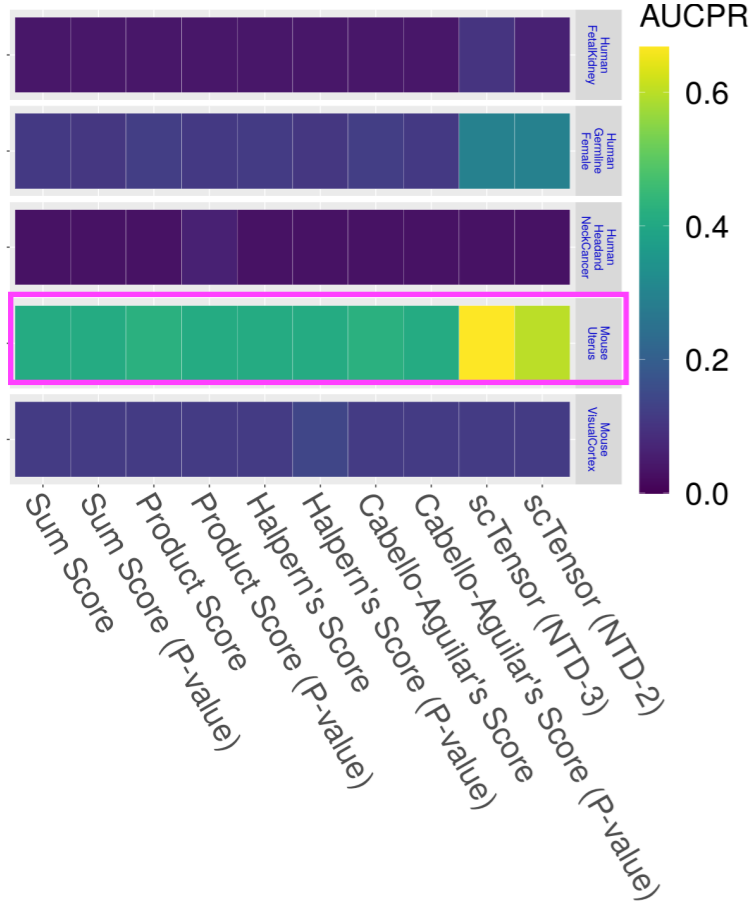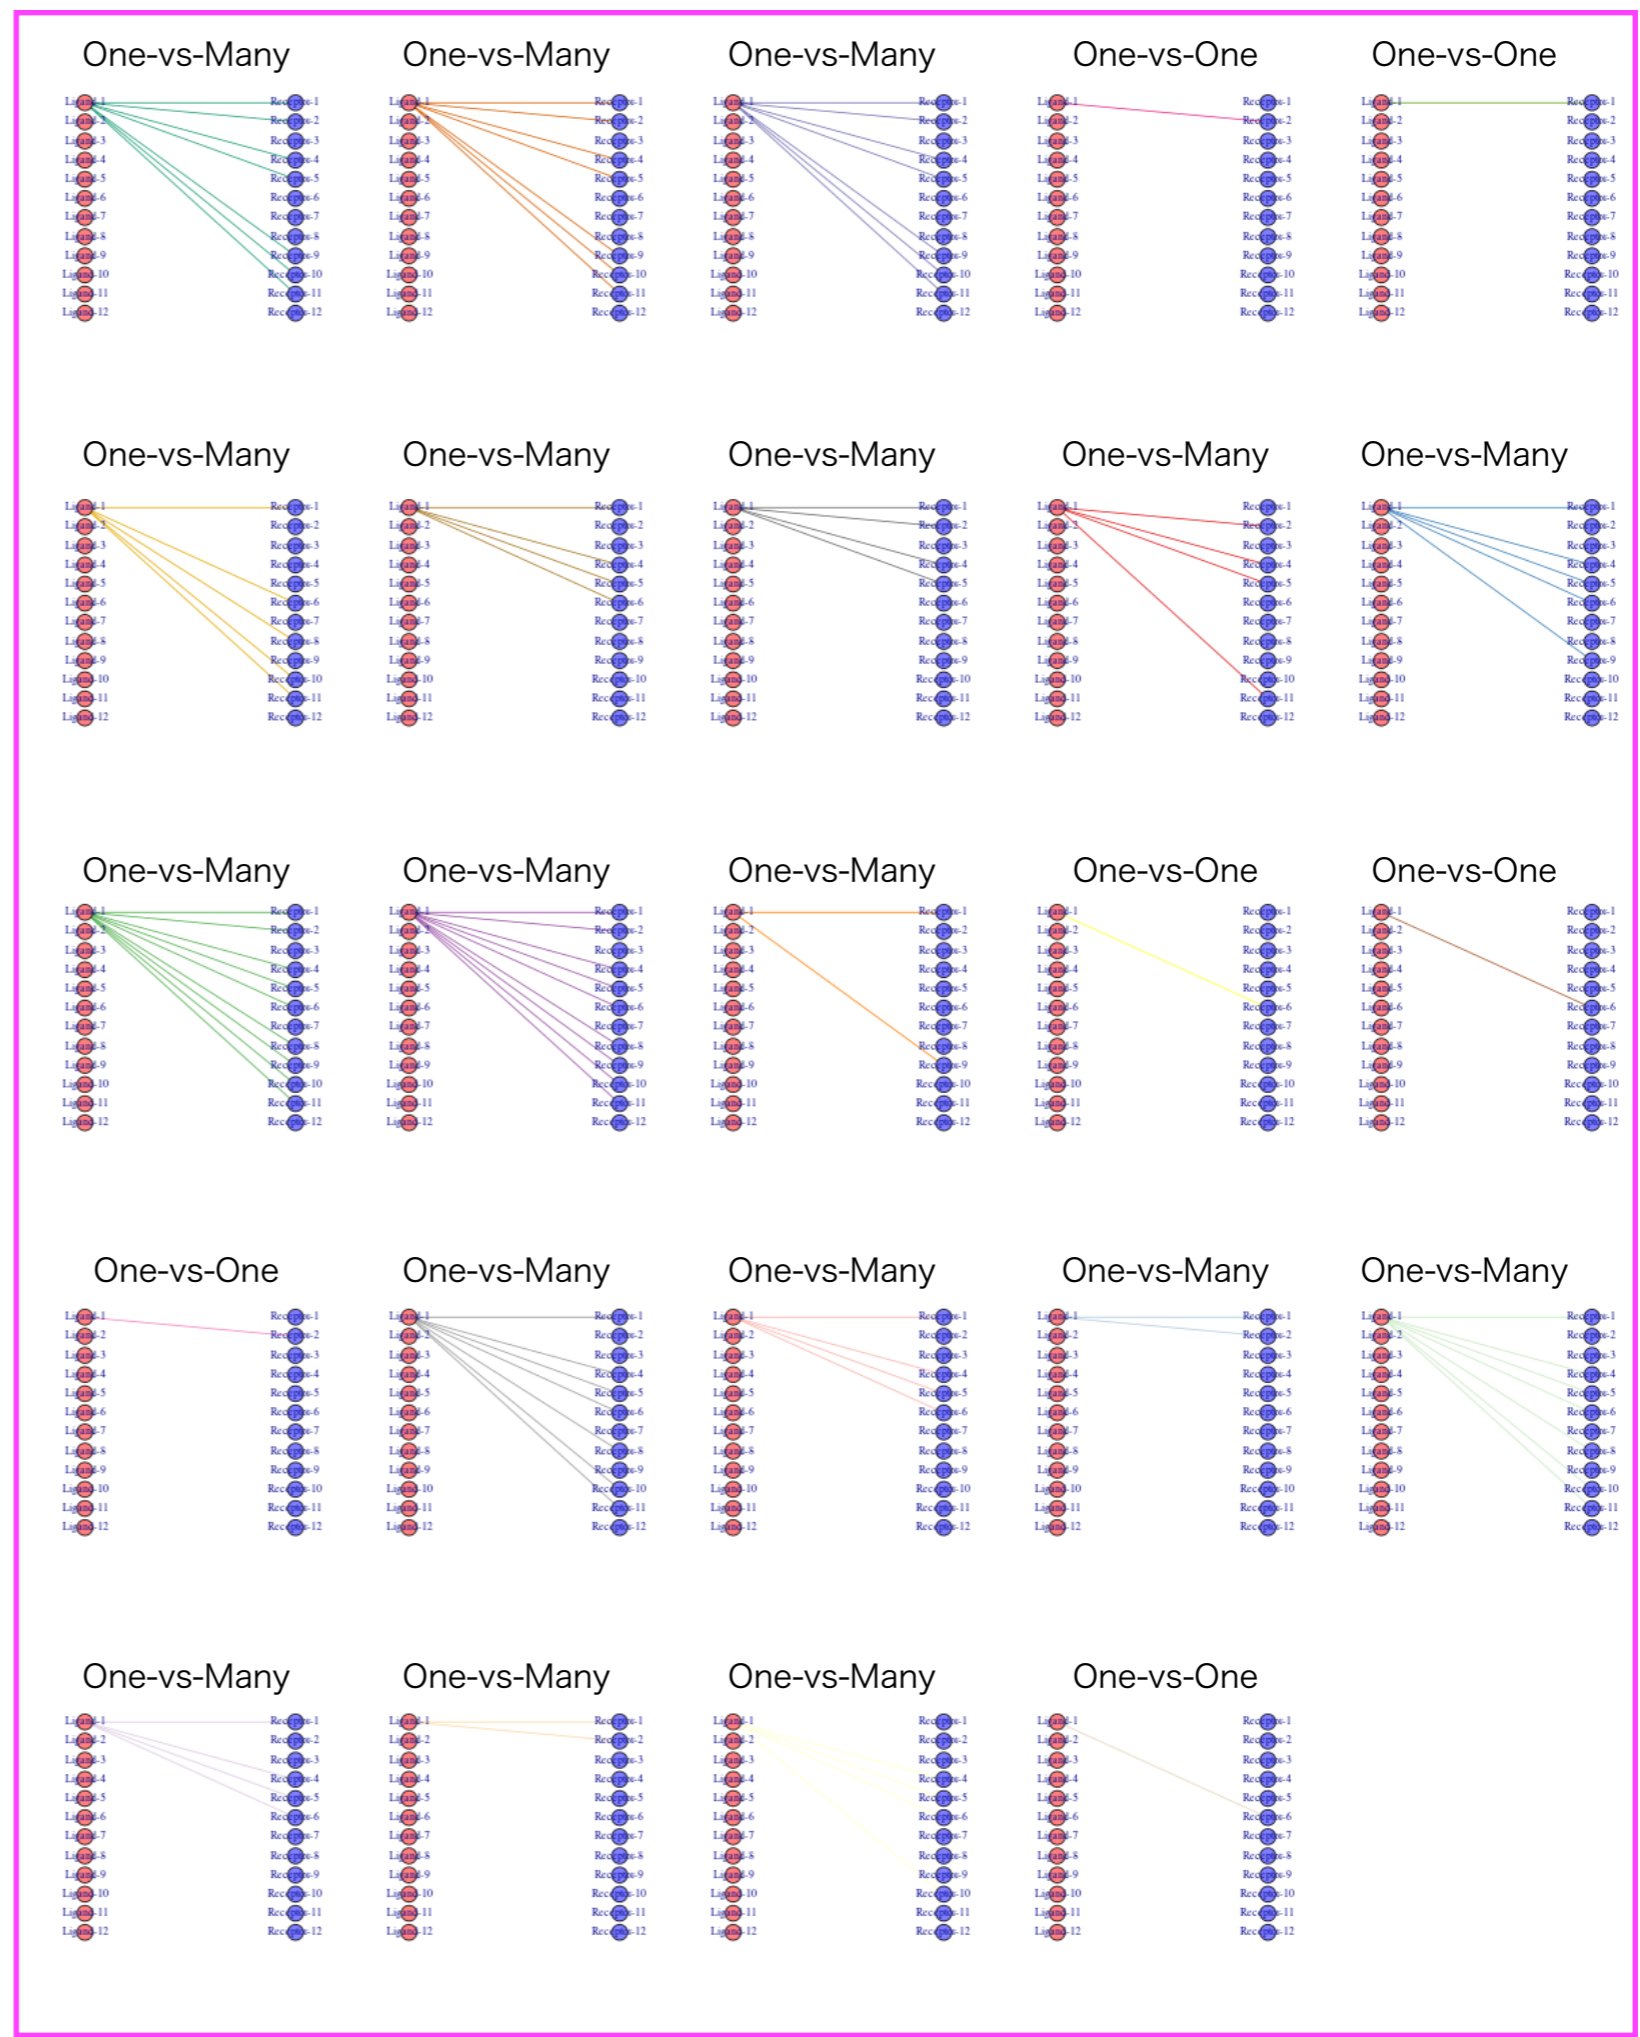



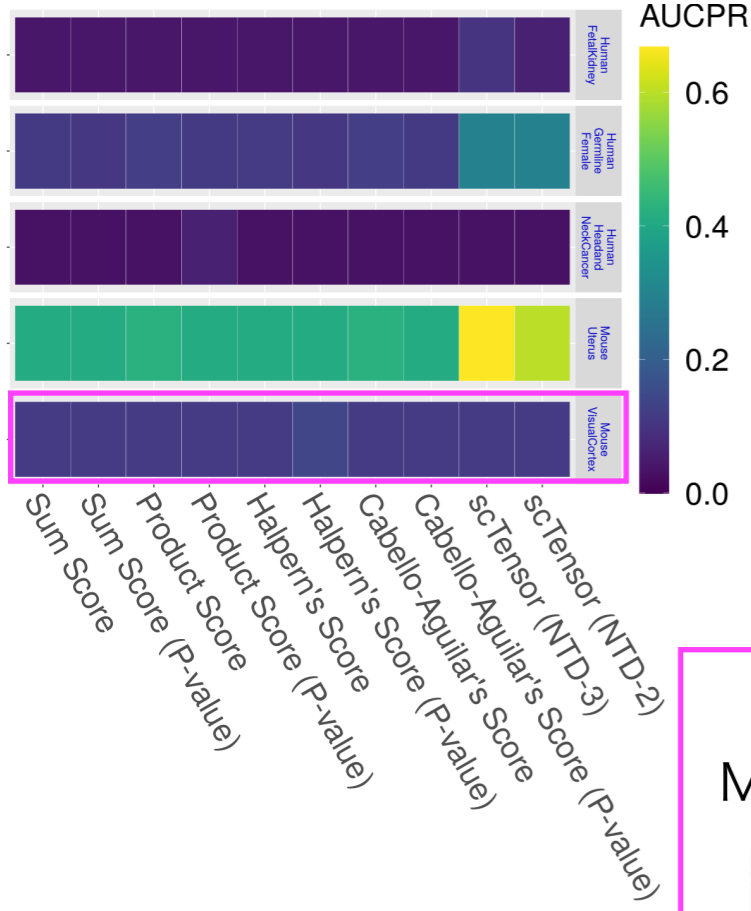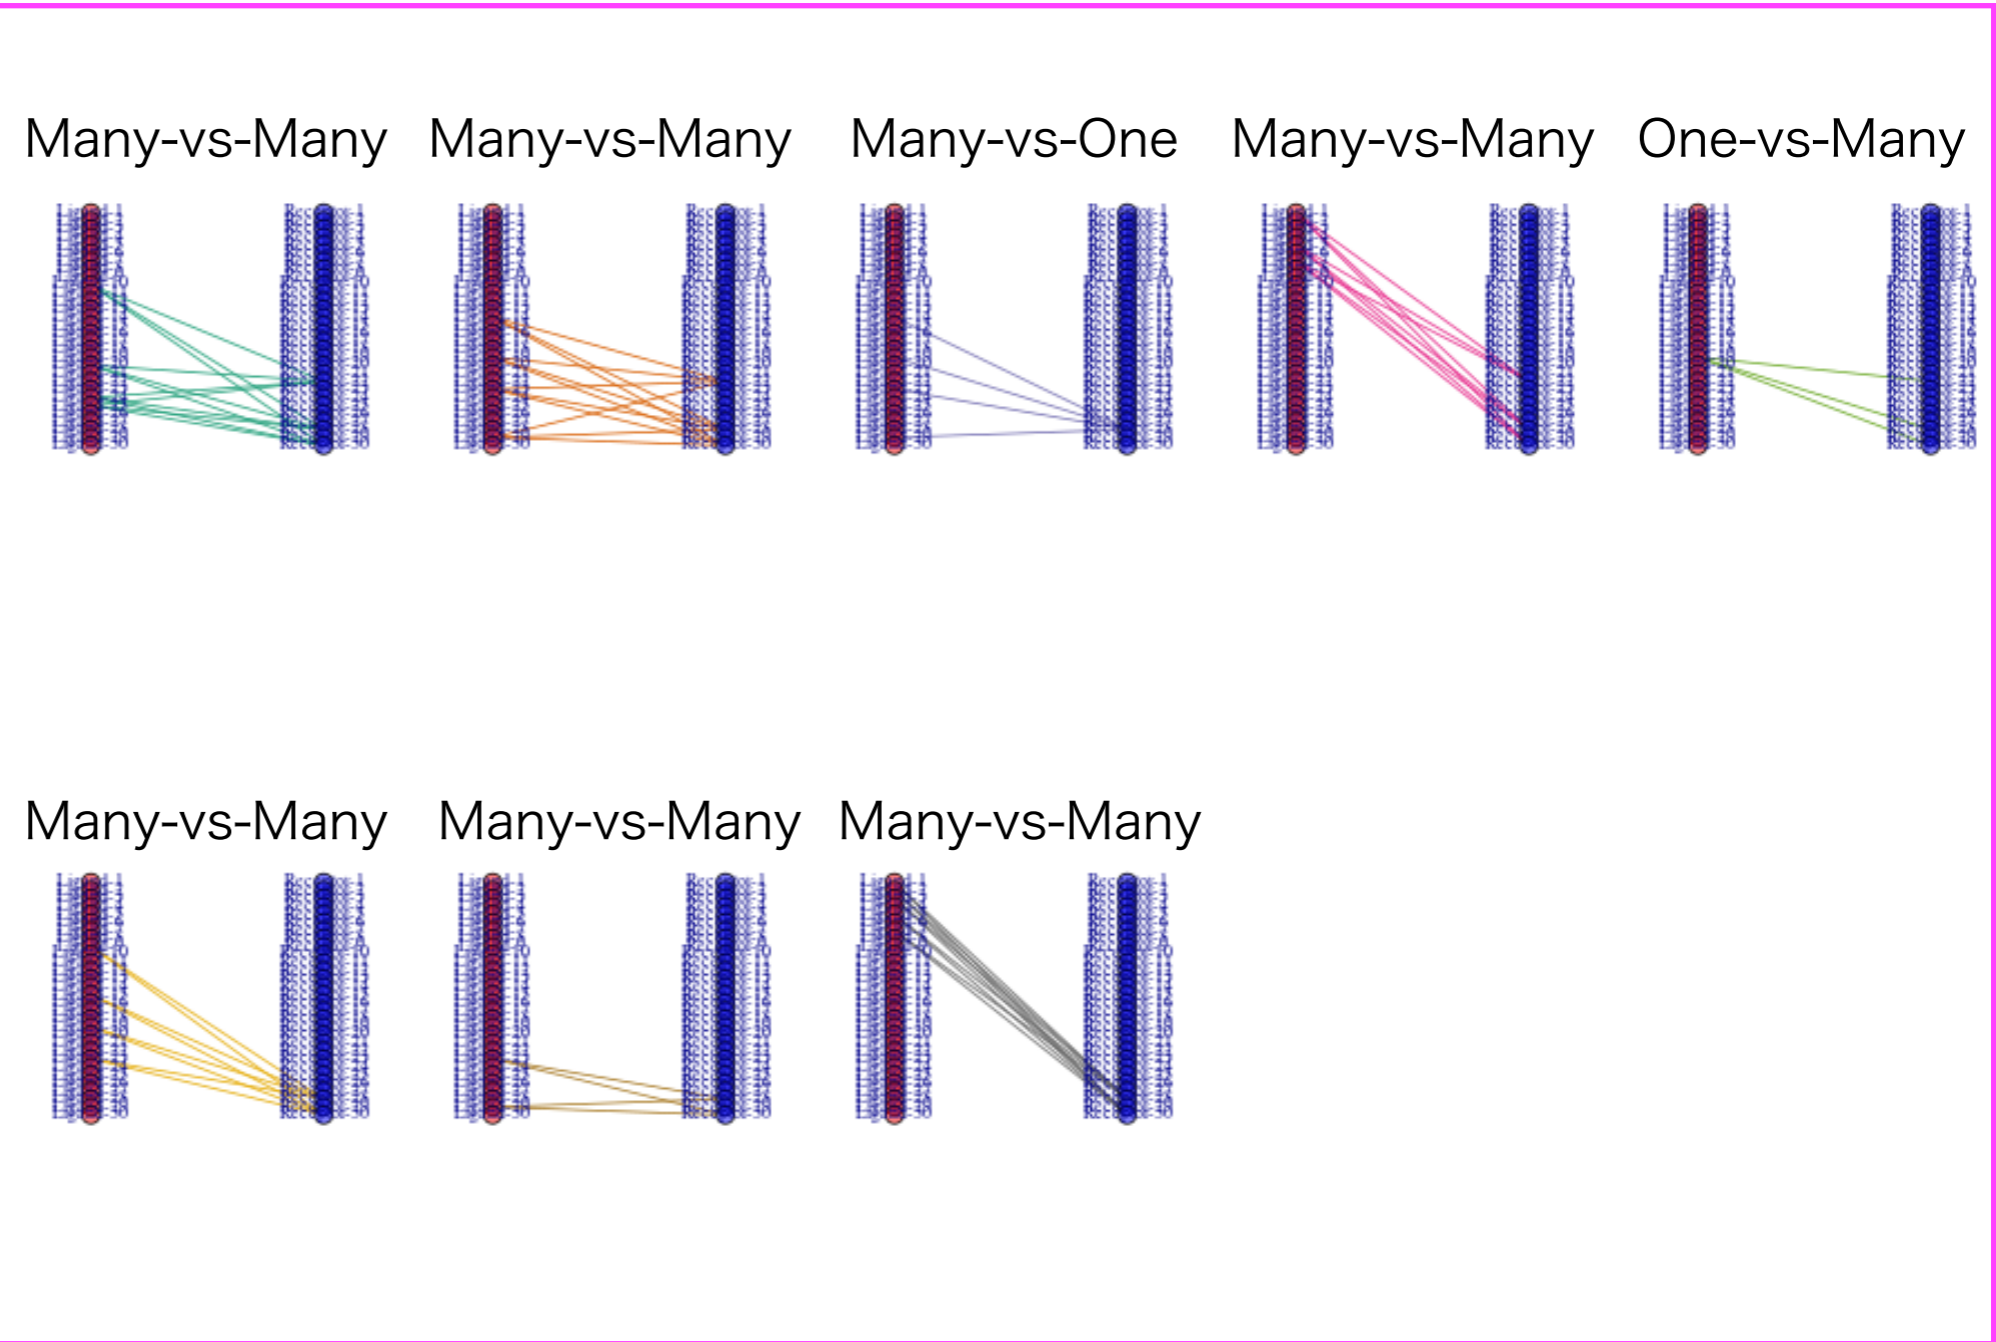

Supplement: 12859_2023_5490_MOESM2_ESM.pdf [file 12859_2023_5490_MOESM2_ESM.pdf]
