# Supplementary material for: Sctensor detects many-to-many cell–cell interactions from single cell RNA-sequencing data
Source: Springer Nature journal article supplement (doi:10.1186/s12859-023-05490-y), 2023-11-07

# Simulated Datasets

## E2 (Summary)

The value ranges 0 to 1 (the closer to 1, the better)

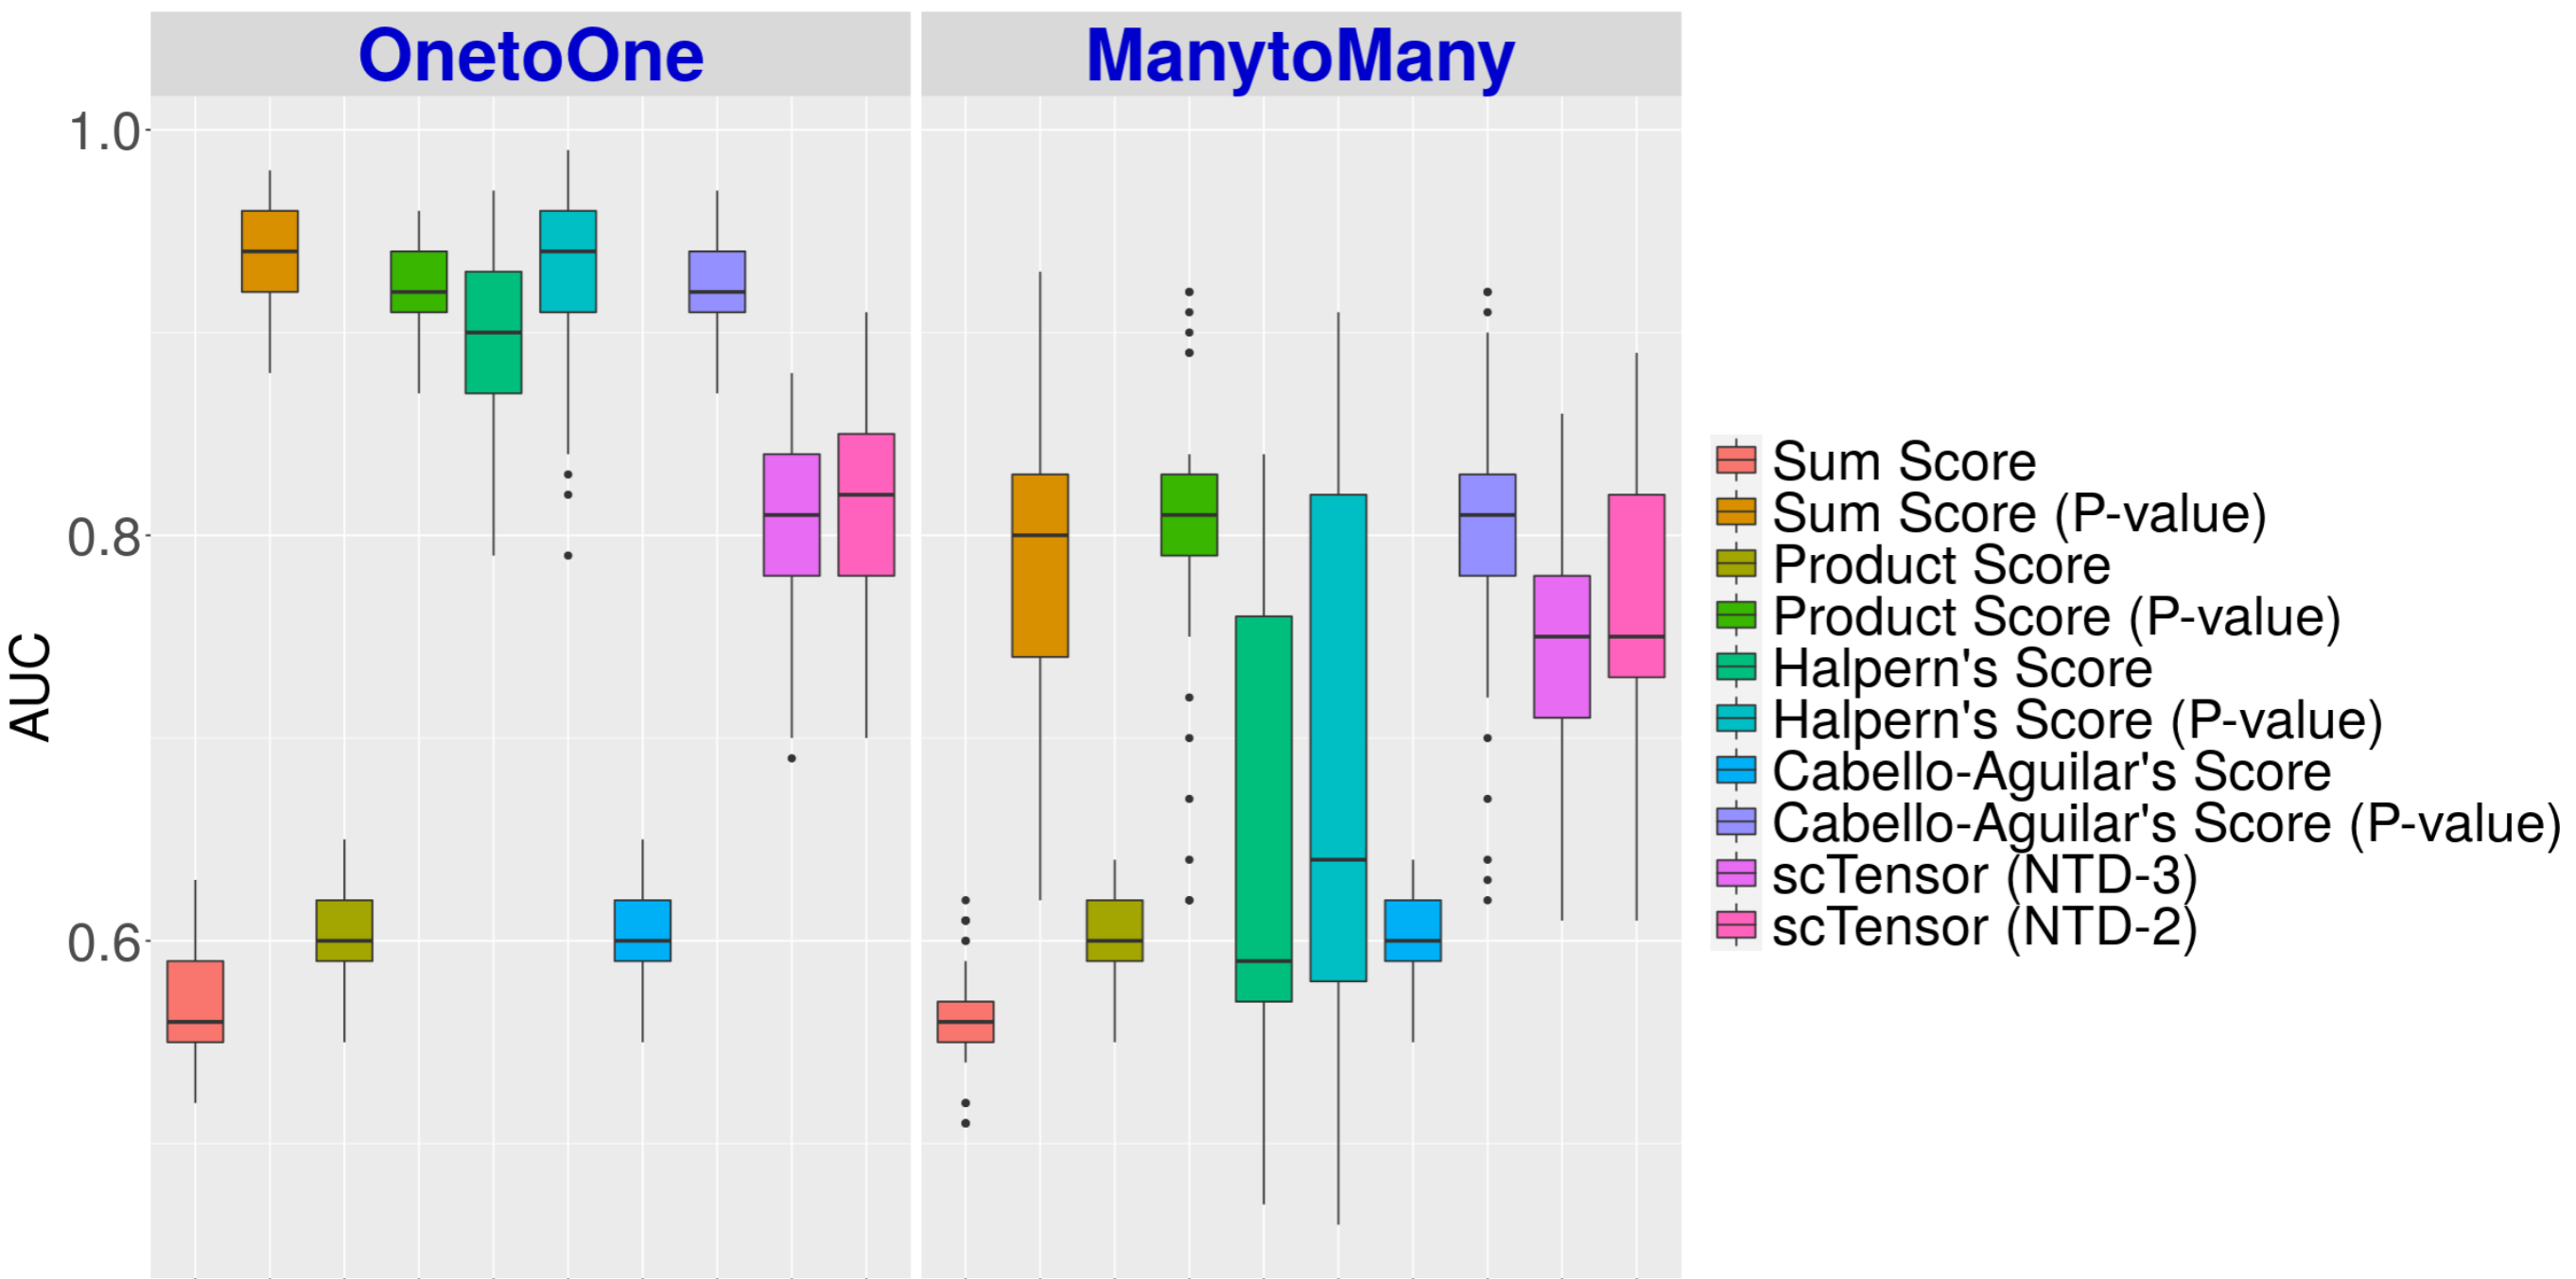

# E5 (Summary)

The value ranges 0 to 1 (the closer to 1, the better)

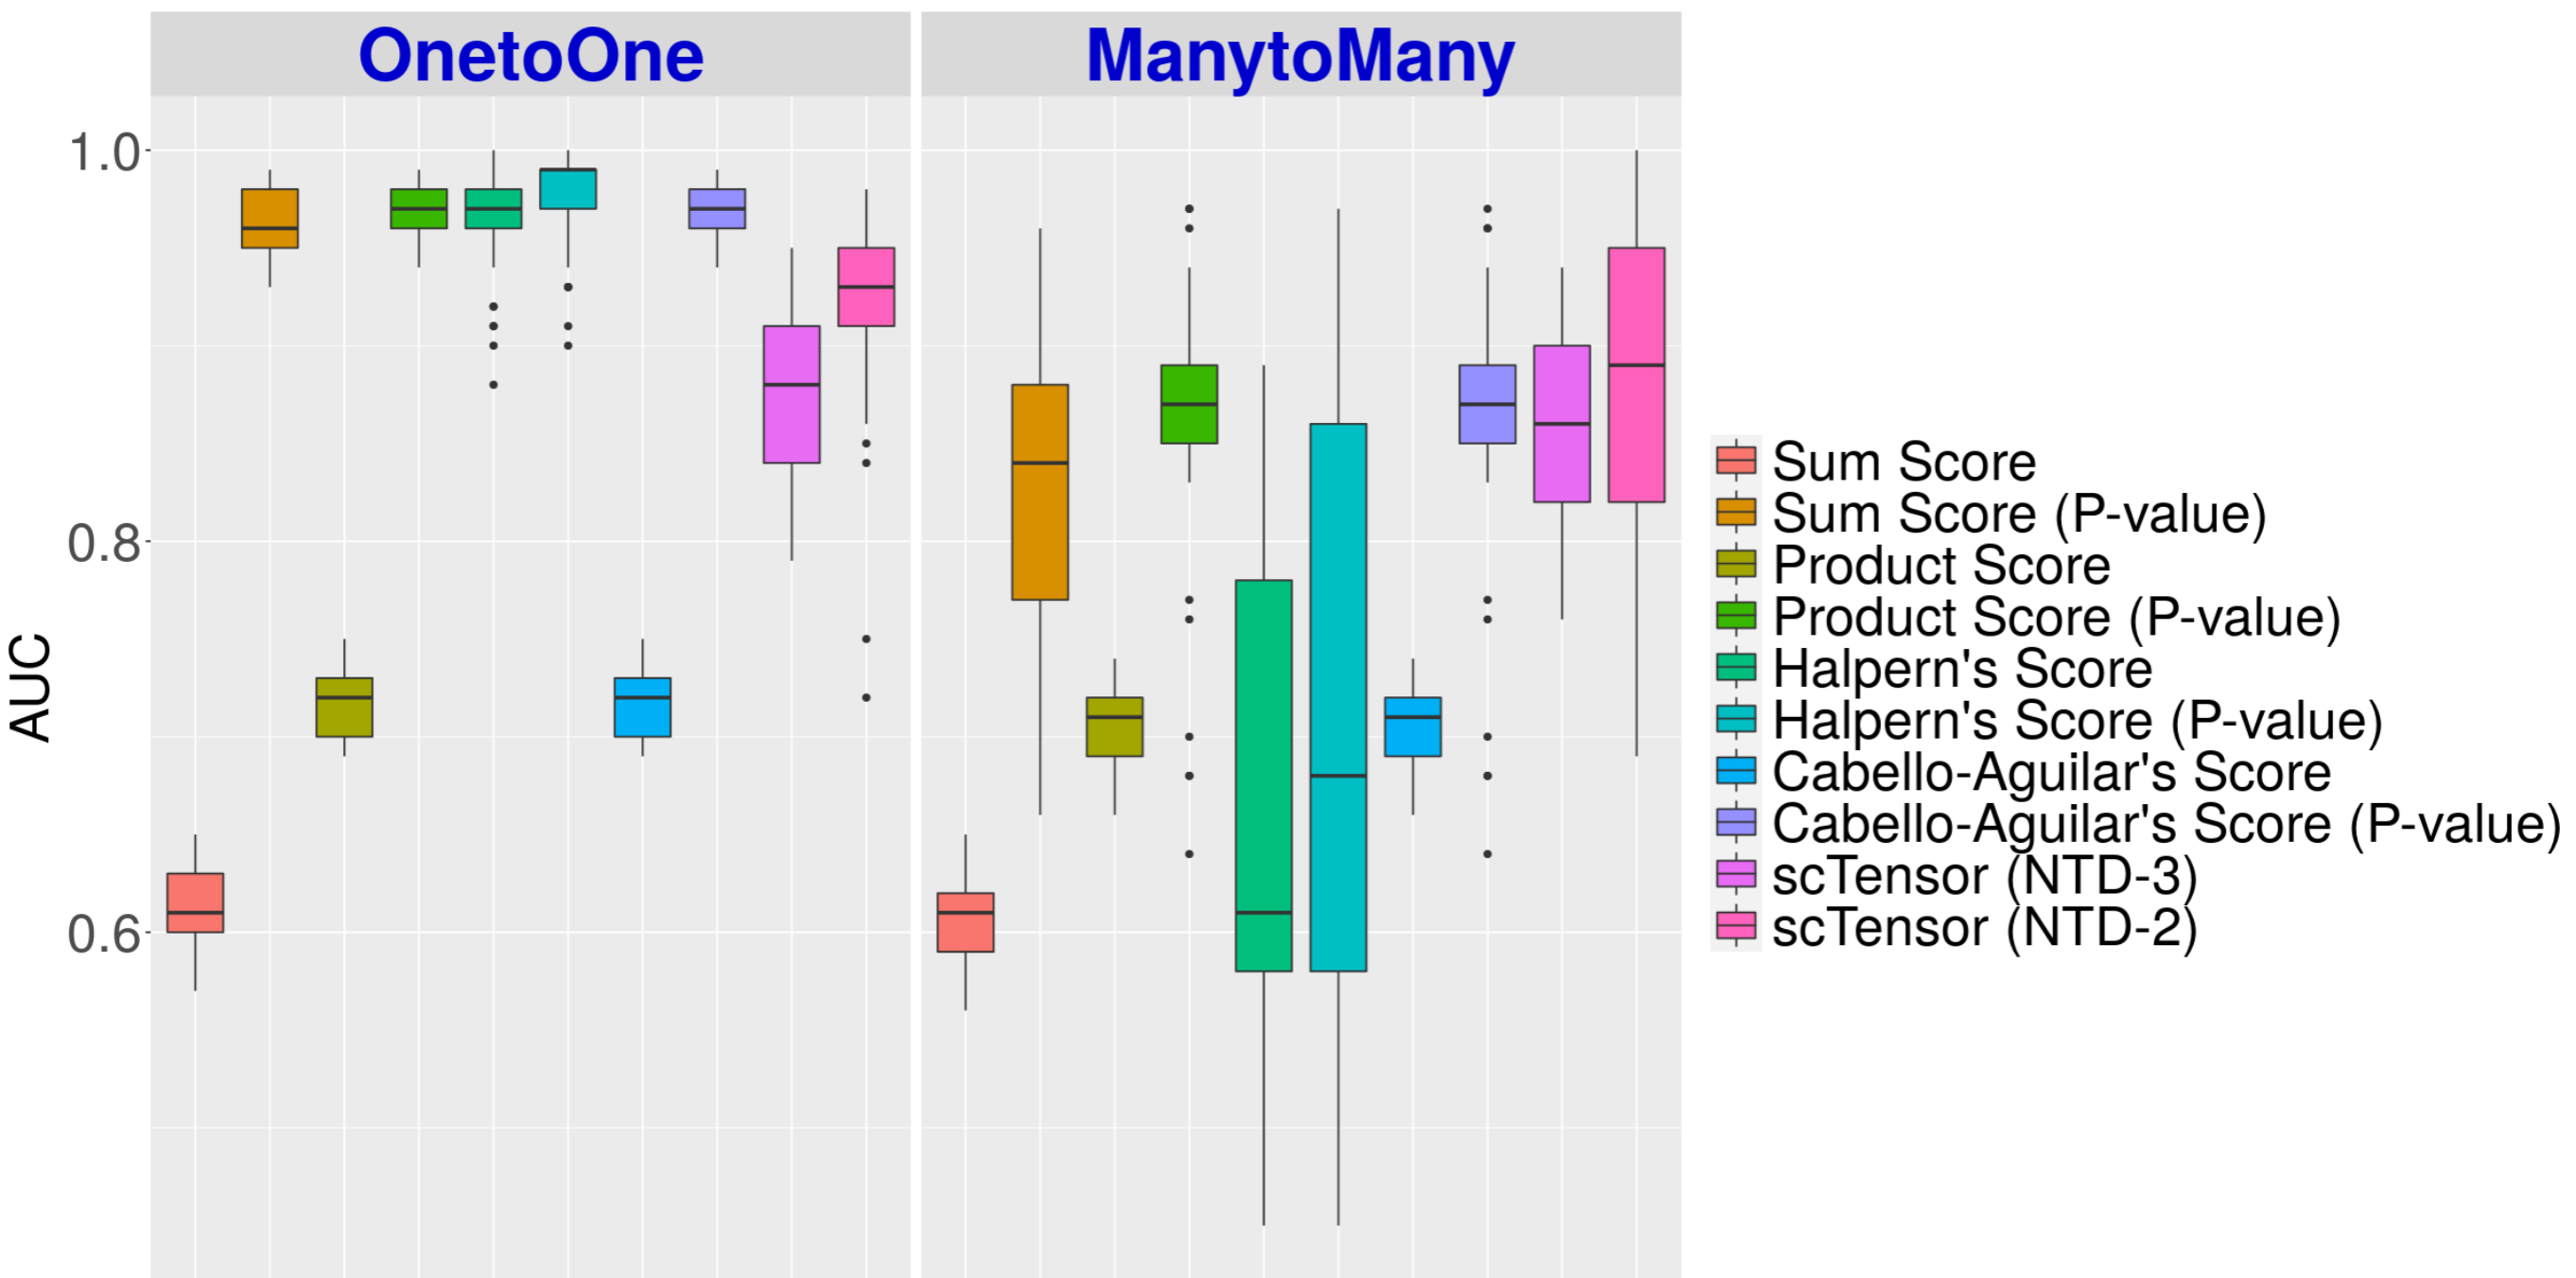

# E10 (Summary)

The value ranges 0 to 1 (the closer to 1, the better)

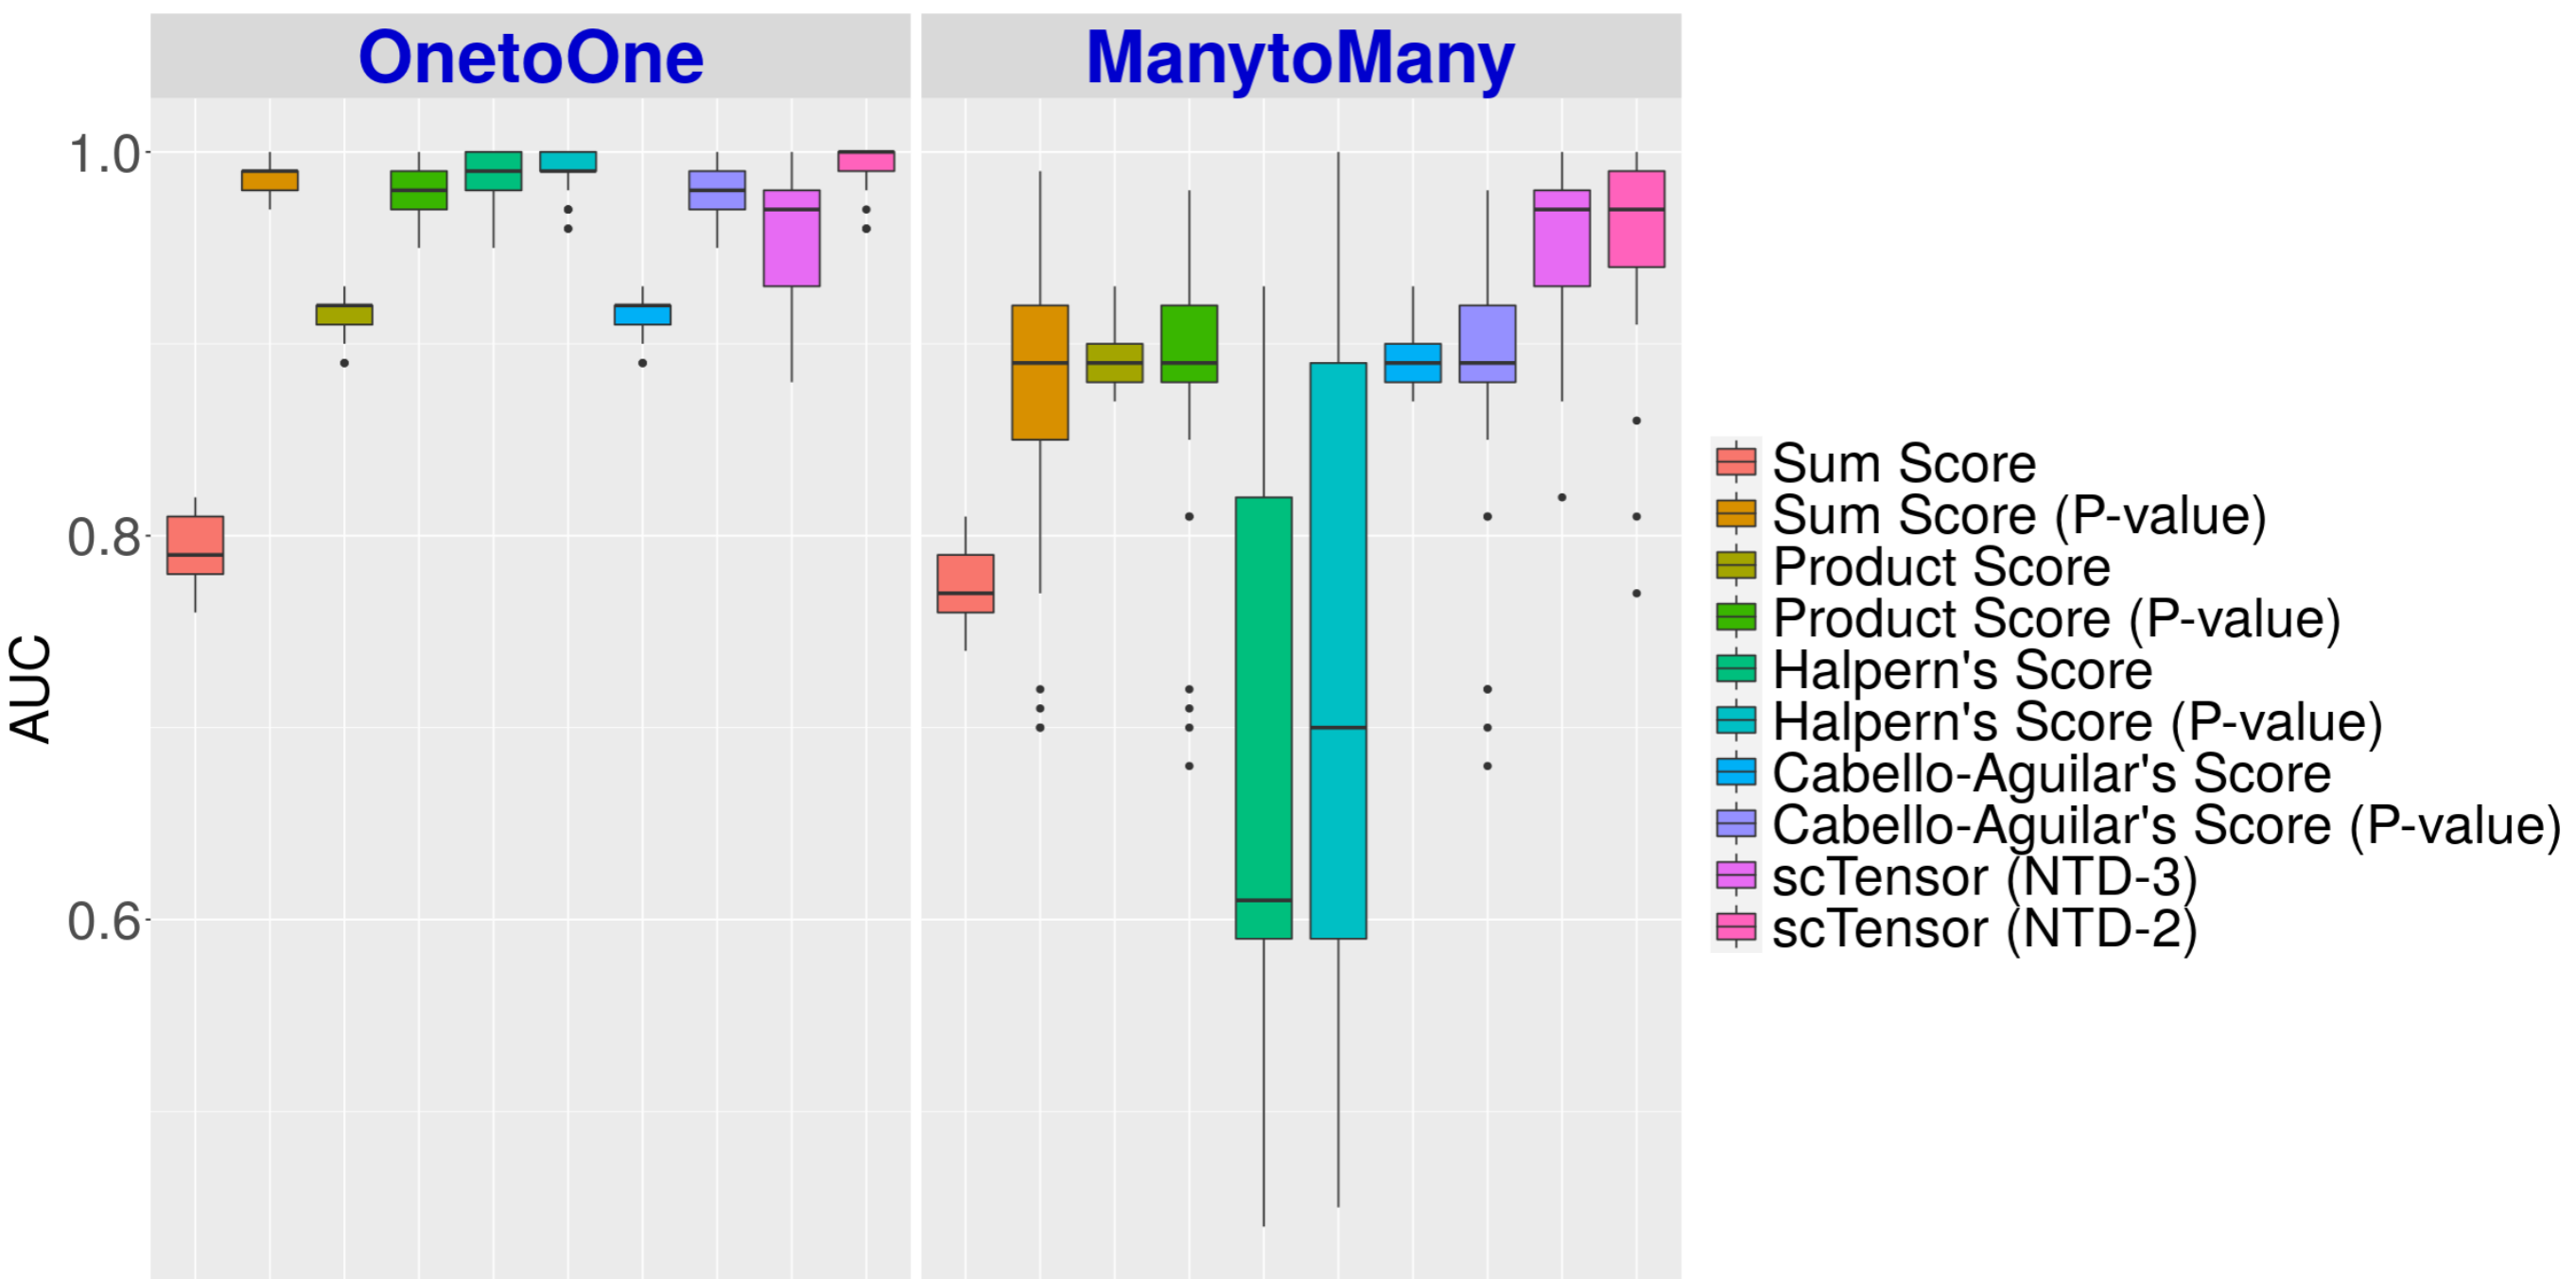

# E2 (Details)

The value ranges 0 to 1 (the closer to 1, the better)

### Sum Score

### Product Score

### Halpern's Score

### Cabello-Aguilar's Score

### scTensor (NTD-3)

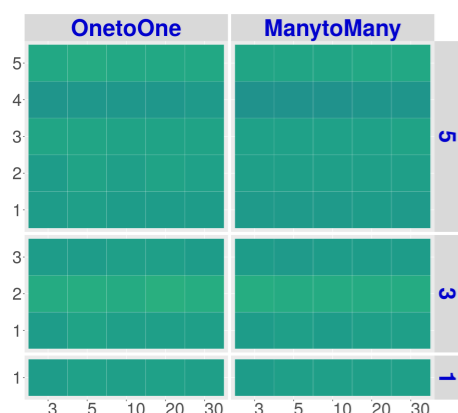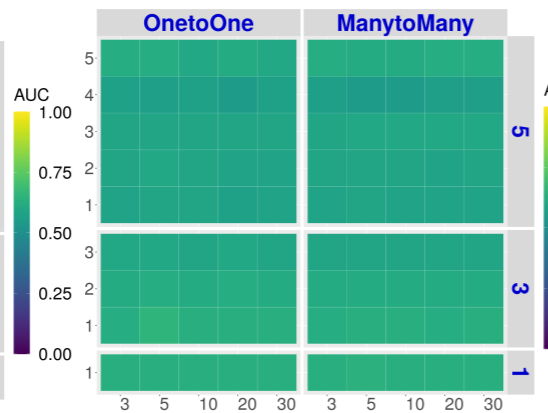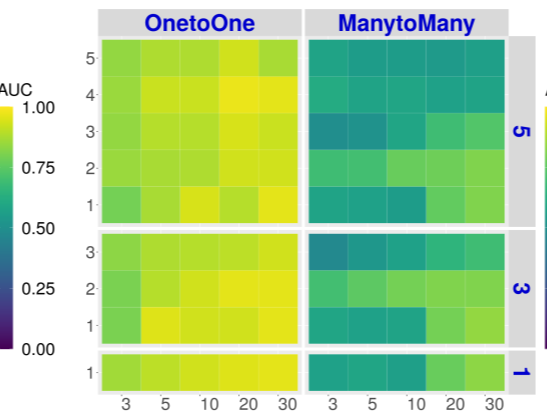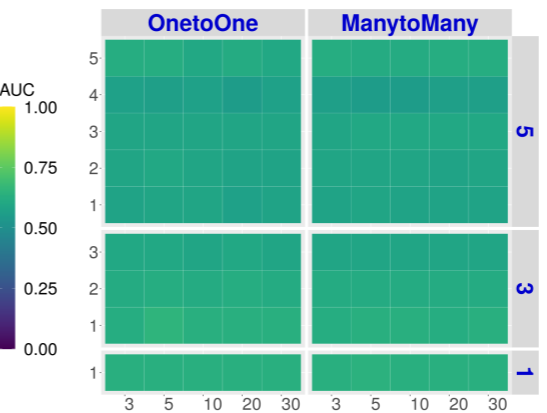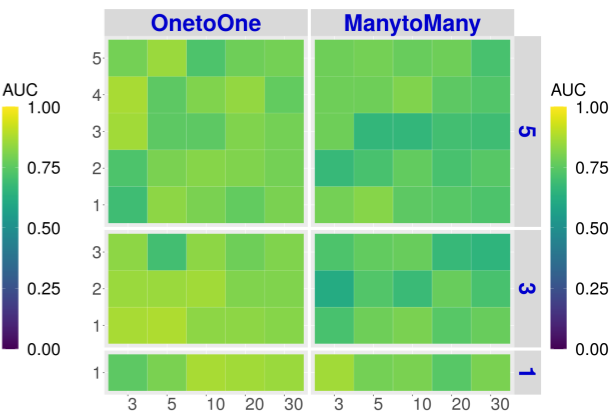

### Sum Score (P-value)

### Product Score (P-value)

### Halpern's Score (P-value)

### Cabello-Aguilar's Score (P-value)

### scTensor (NTD-2)

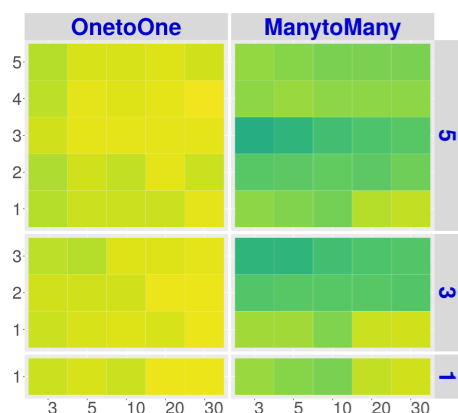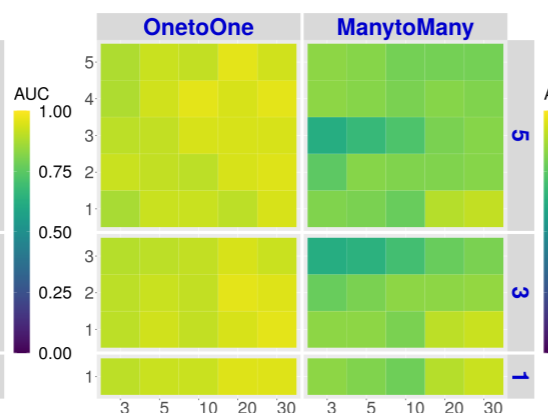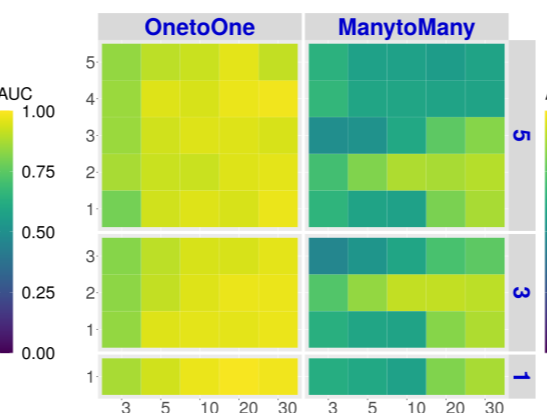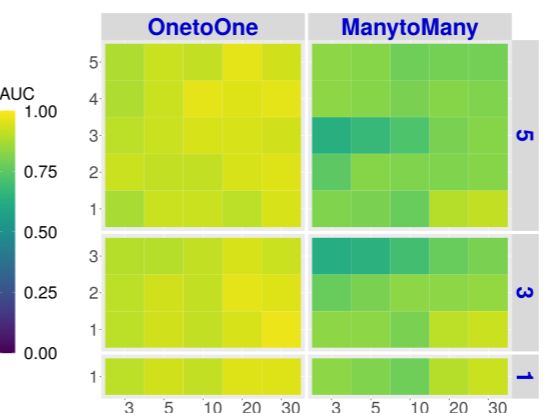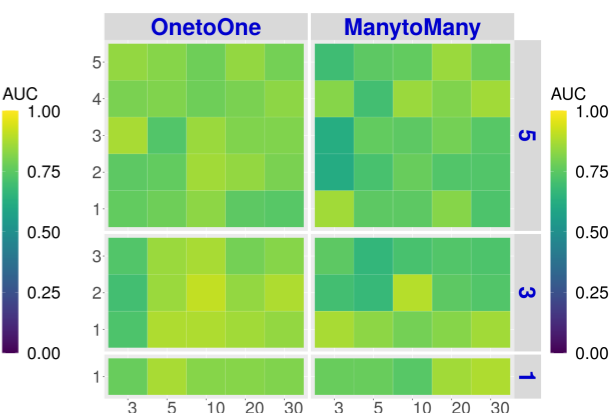

# E5 (Details)

The value ranges 0 to 1 (the closer to 1, the better)

## Sum Score

## Product Score

## Halpern's Score

## Cabello-Aguilar's Score

## scTensor (NTD-3)

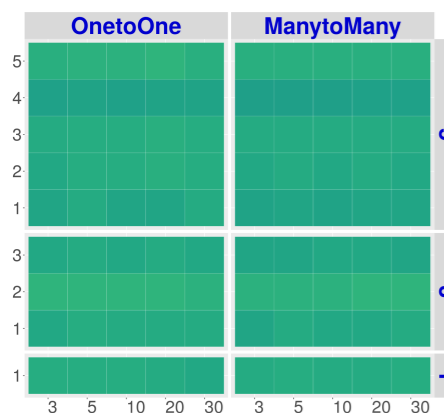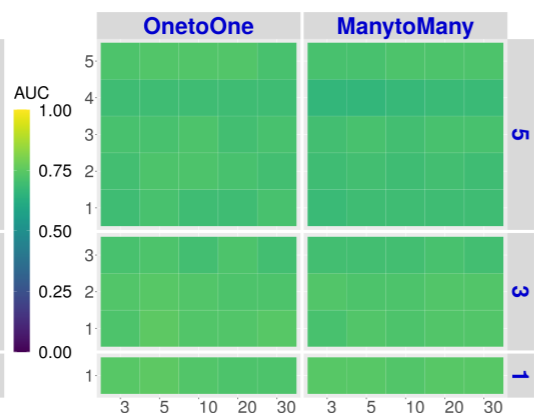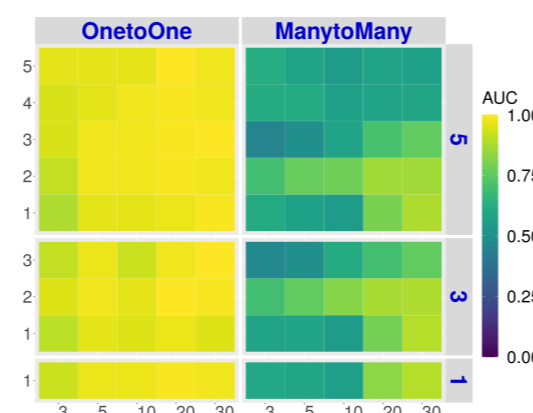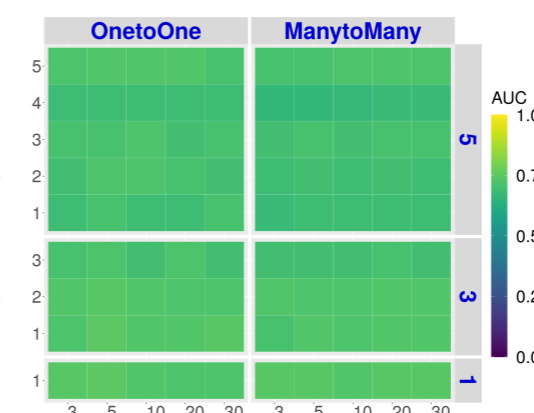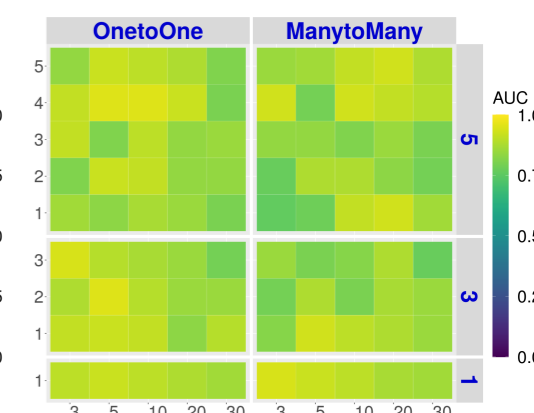

## Sum Score (P-value)

## Product Score (P-value)

## Halpern's Score (P-value)

## Cabello-Aguilar's Score (P-value)

## scTensor (NTD-2)

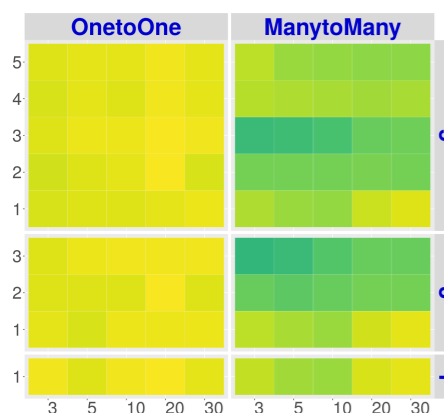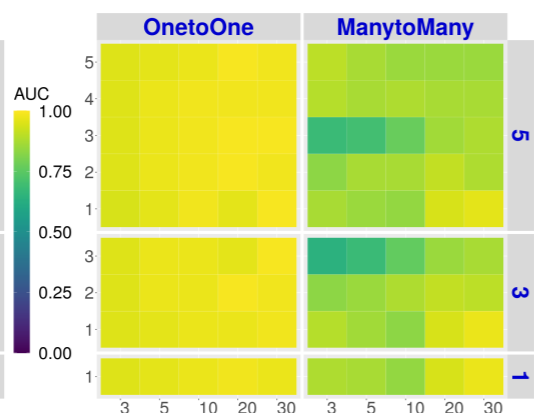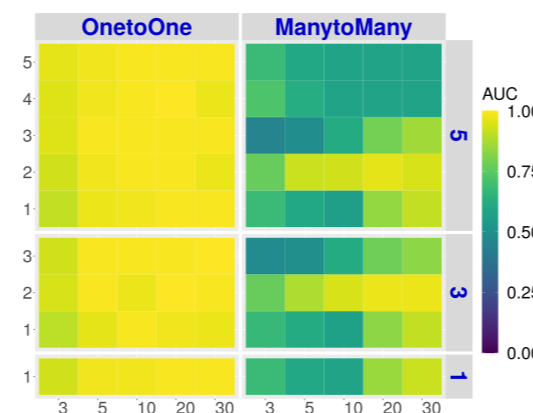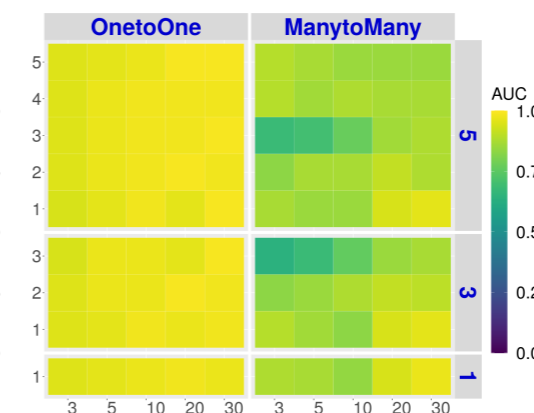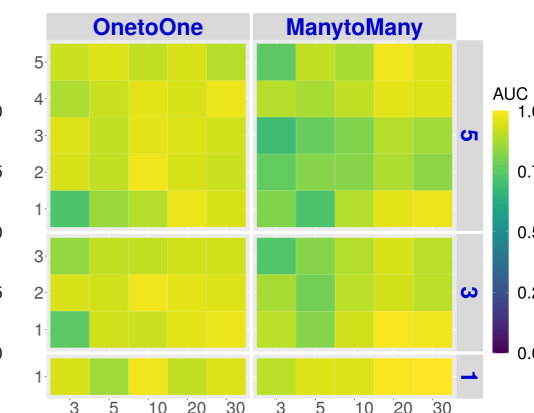

# E10 (Details)

The value ranges 0 to 1 (the closer to 1, the better)

### Sum Score

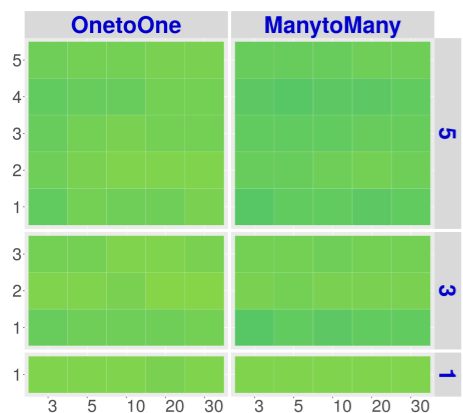

### Product Score

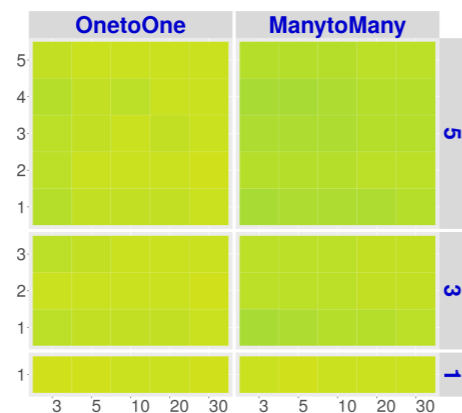

### Halpern's Score

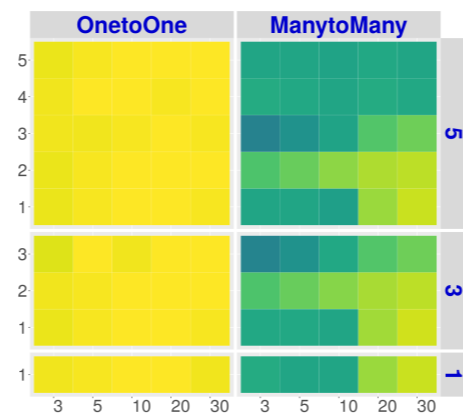

### Cabello-Aguilar's Score

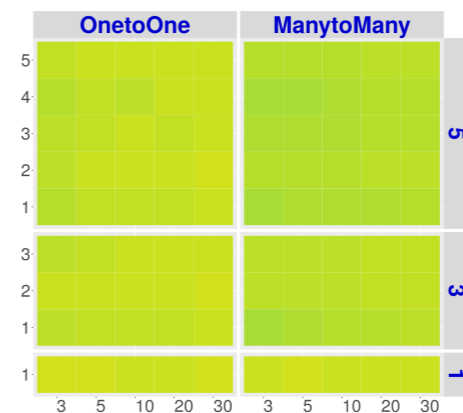

### scTensor (NTD-3)

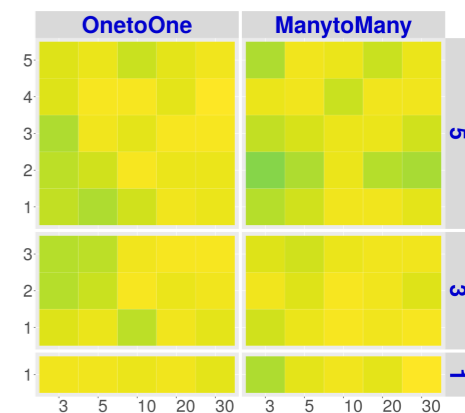

### Sum Score (P-value)

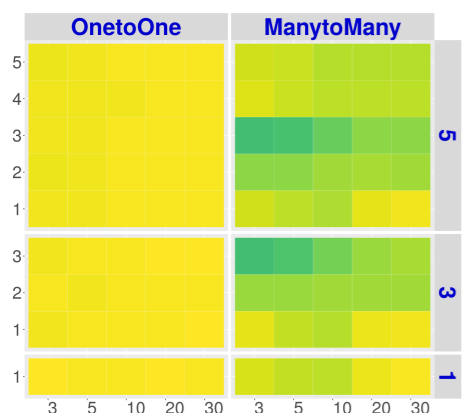

### Product Score (P-value)

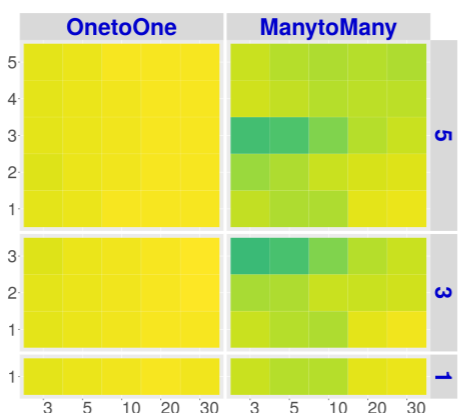

### Halpern's Score (P-value)

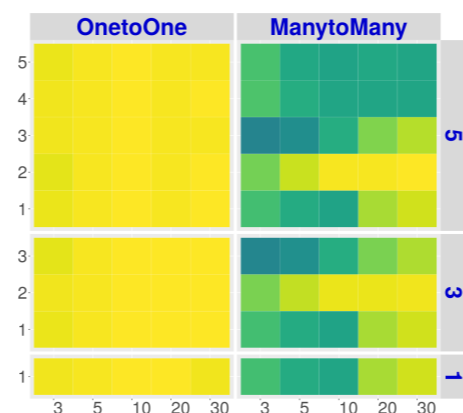

### Cabello-Aguilar's Score (P-value)

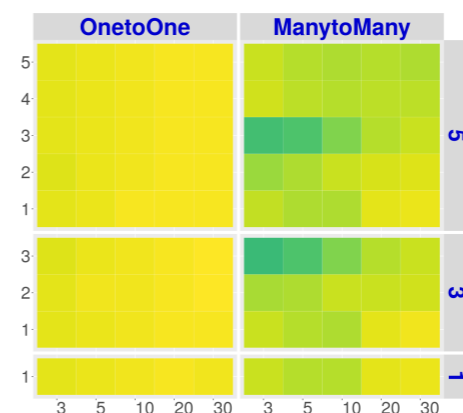

### scTensor (NTD-2)

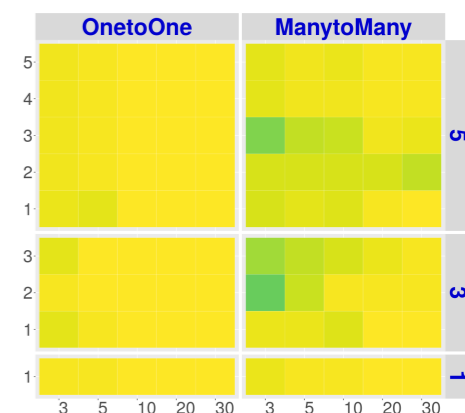

# Real Datasets



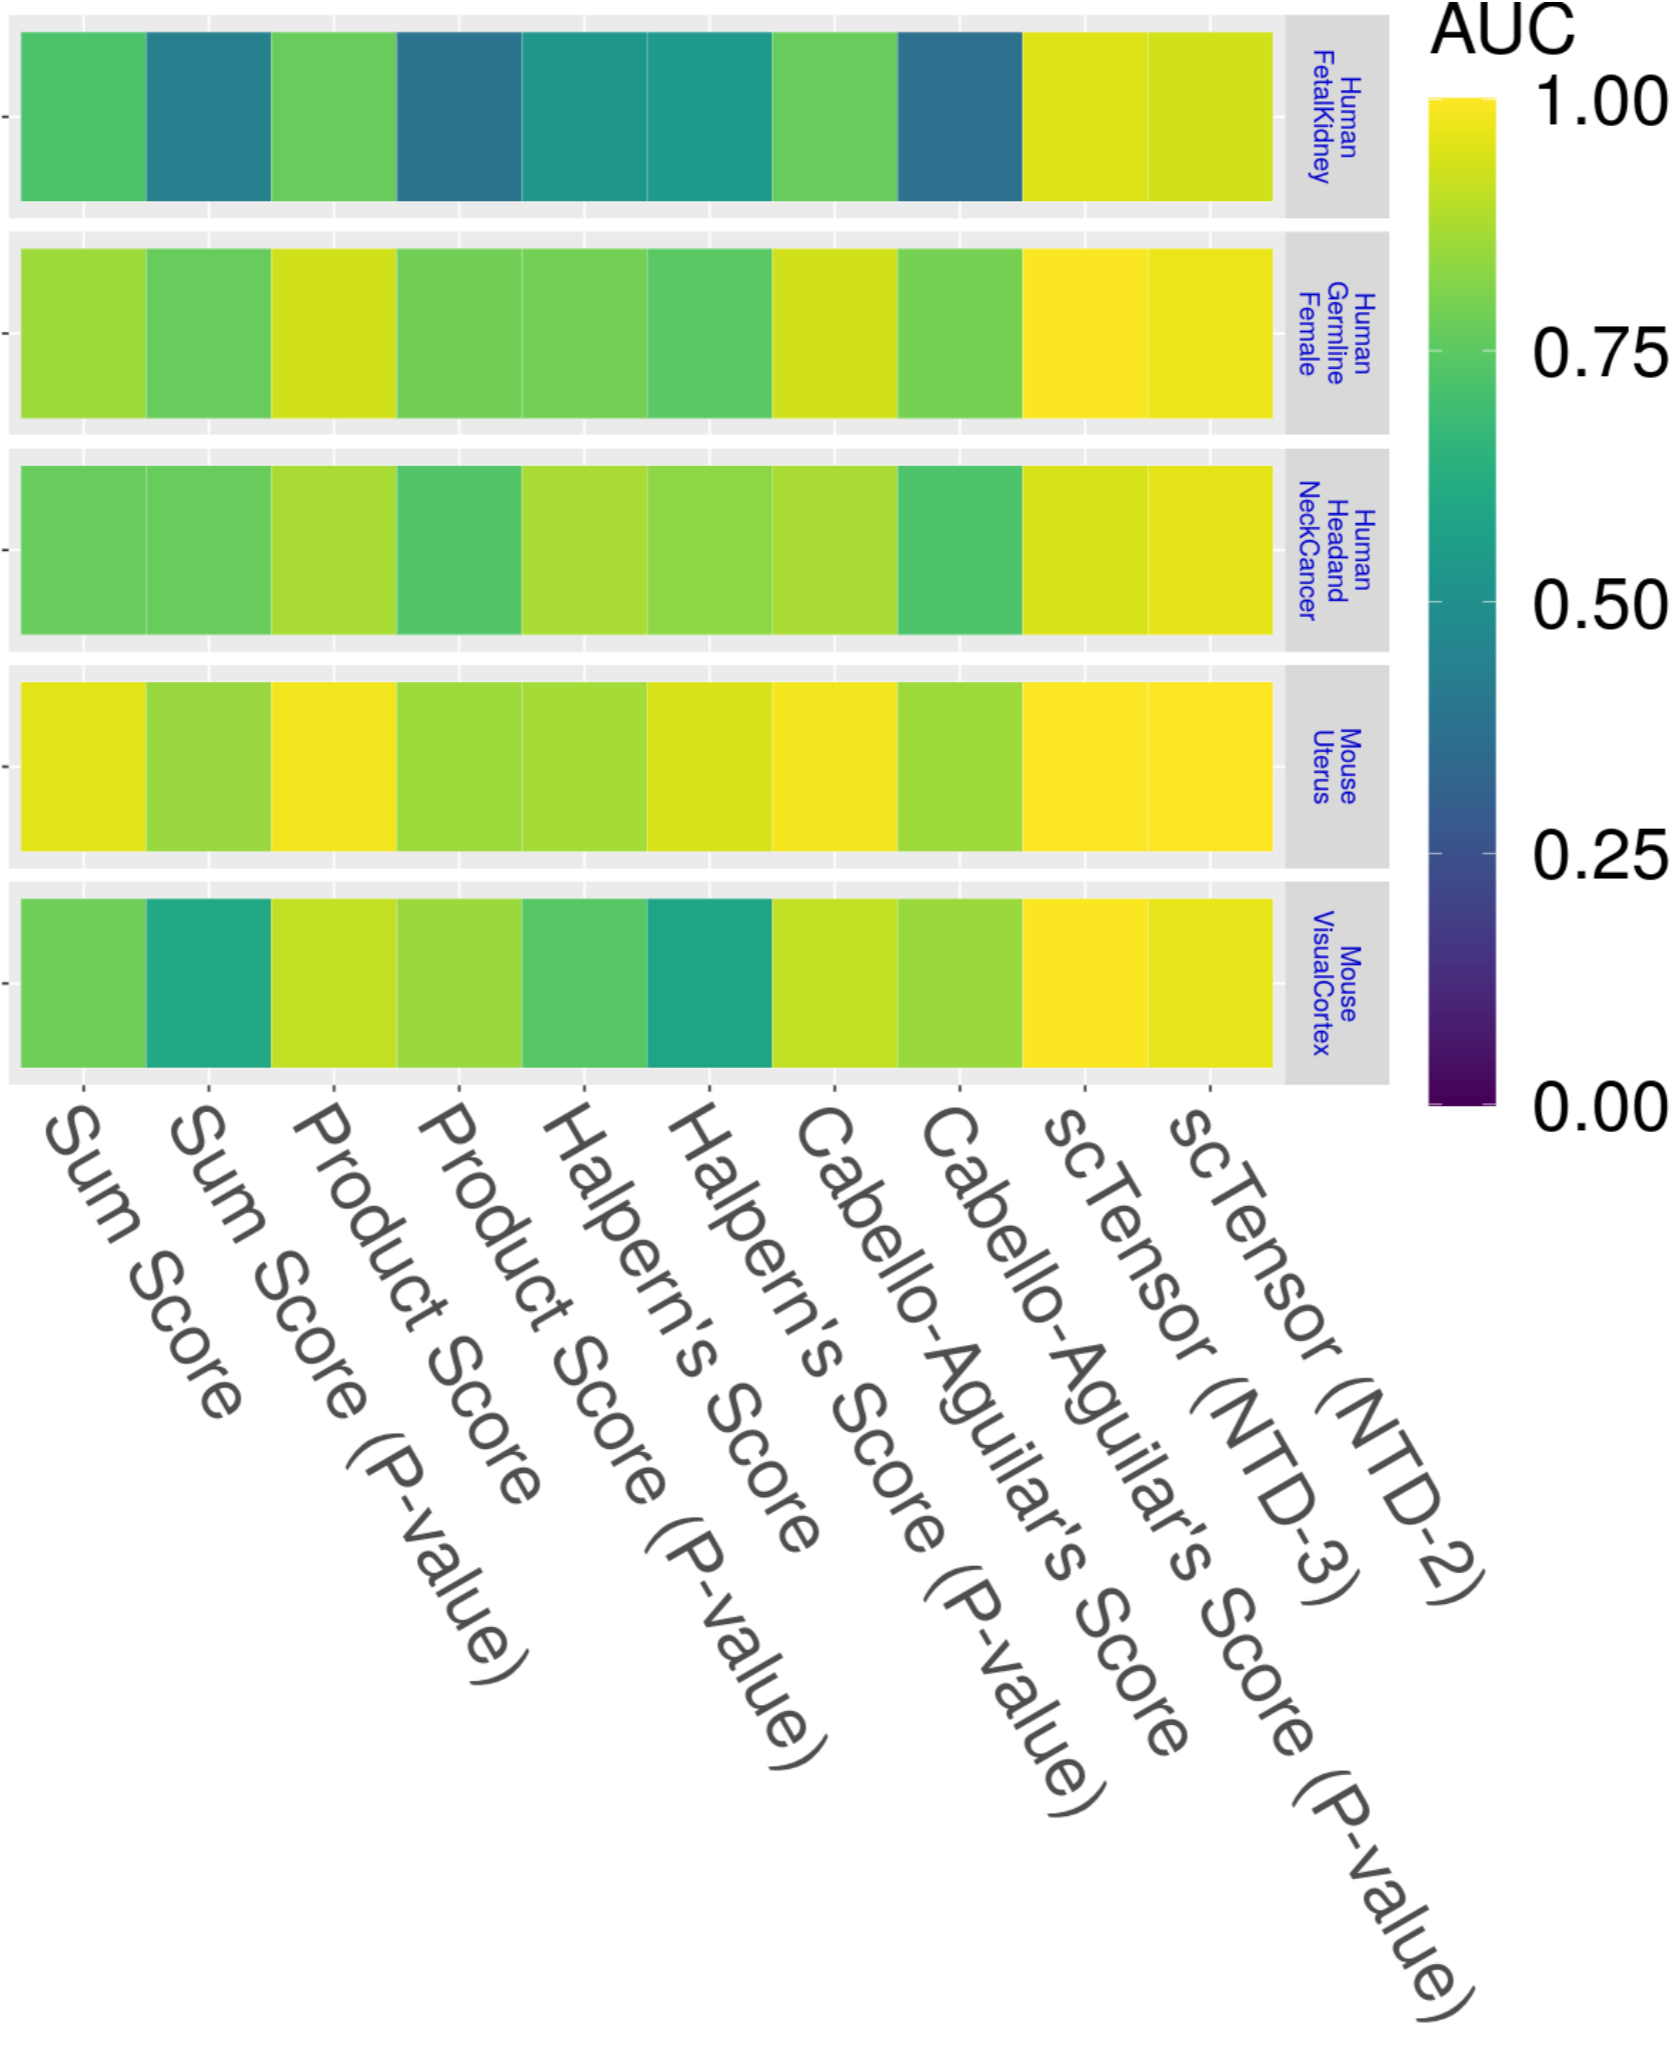

Supplement: 12859_2023_5490_MOESM3_ESM.pdf [file 12859_2023_5490_MOESM3_ESM.pdf]
