# Supplementary material for: Sctensor detects many-to-many cell–cell interactions from single cell RNA-sequencing data
Source: Springer Nature journal article supplement (doi:10.1186/s12859-023-05490-y), 2023-11-07

# Simulated Datasets

# E2 (Summary)

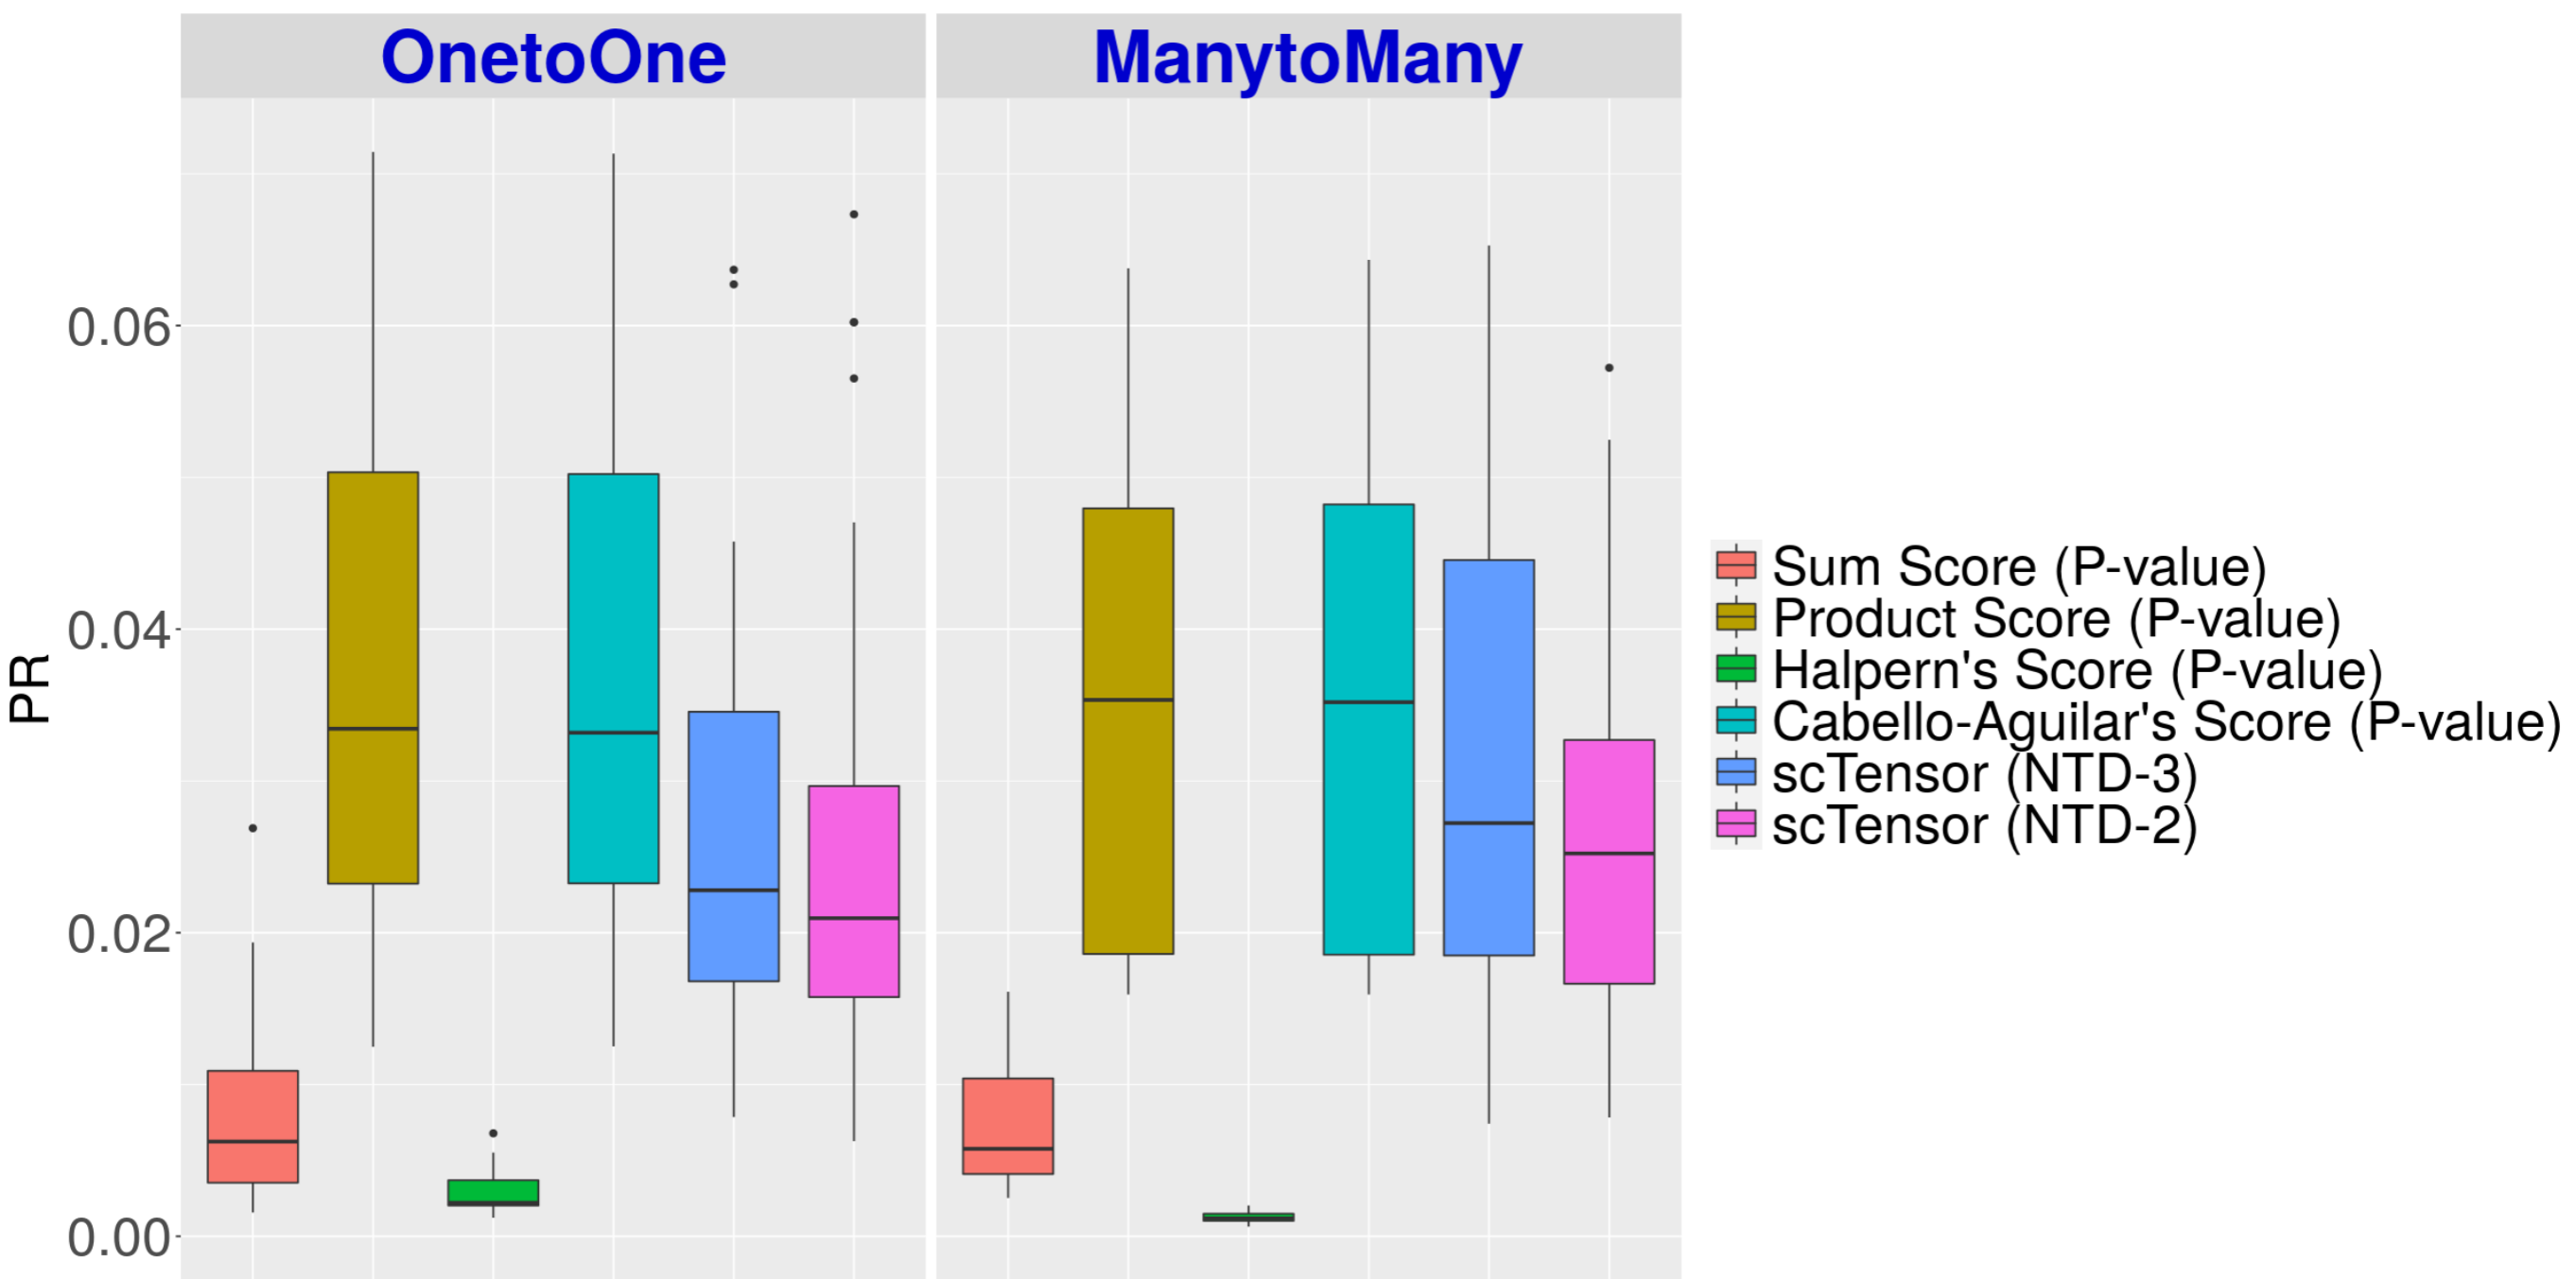

# E5 (Summary)

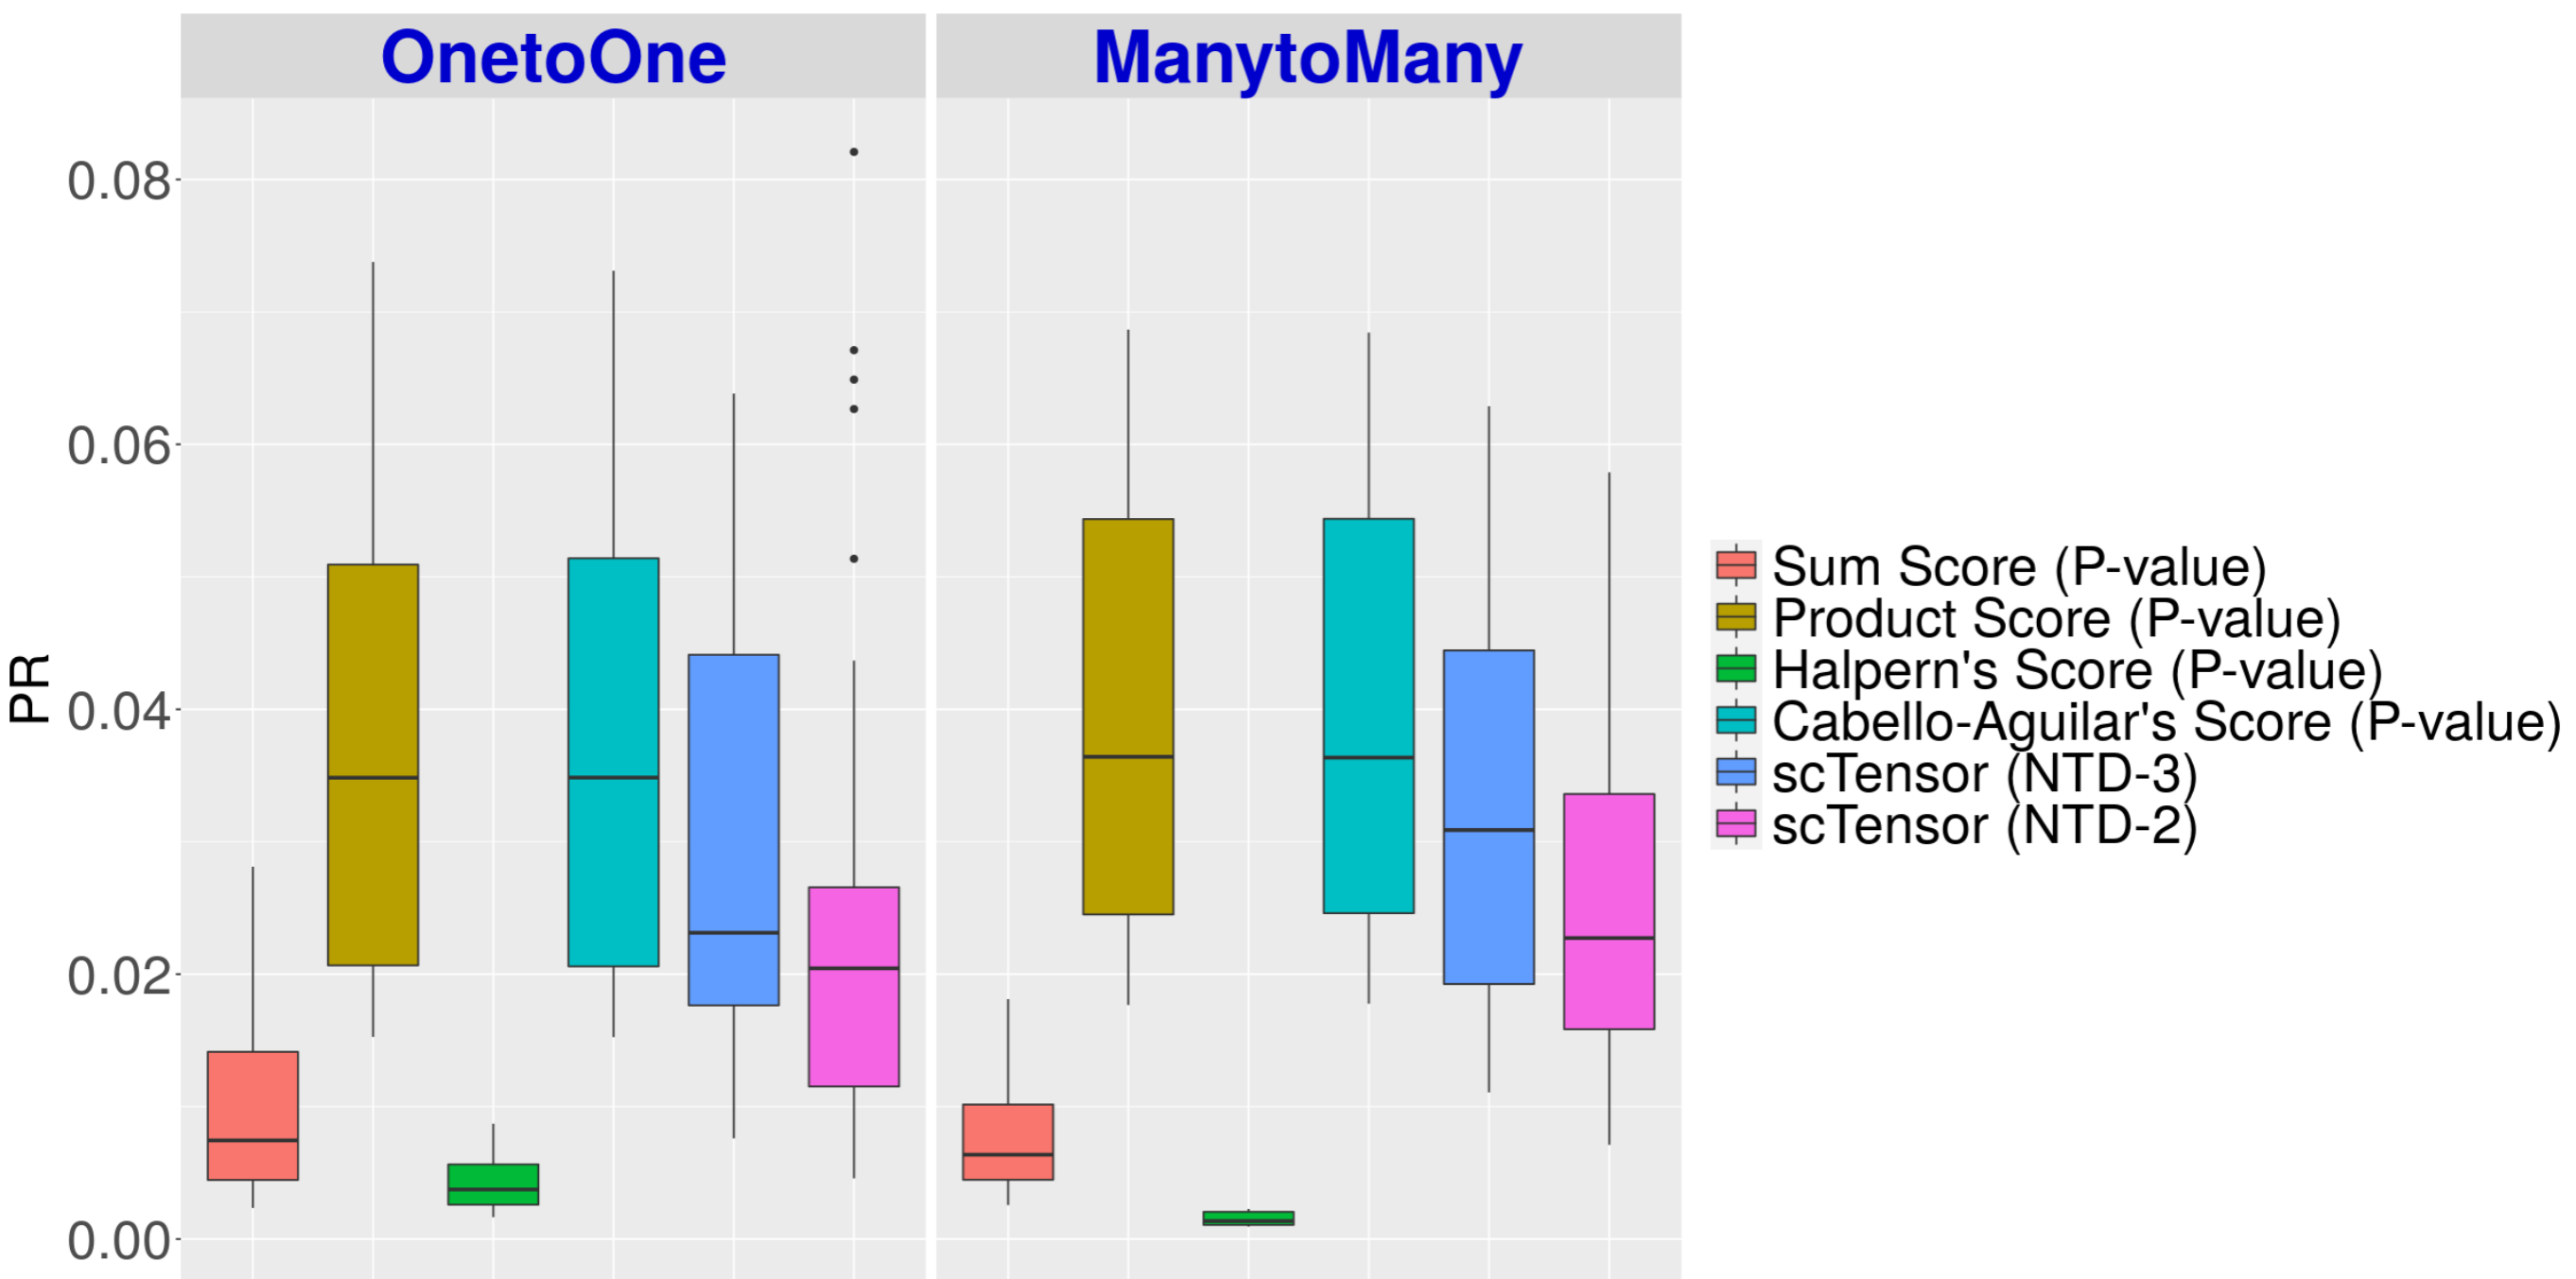

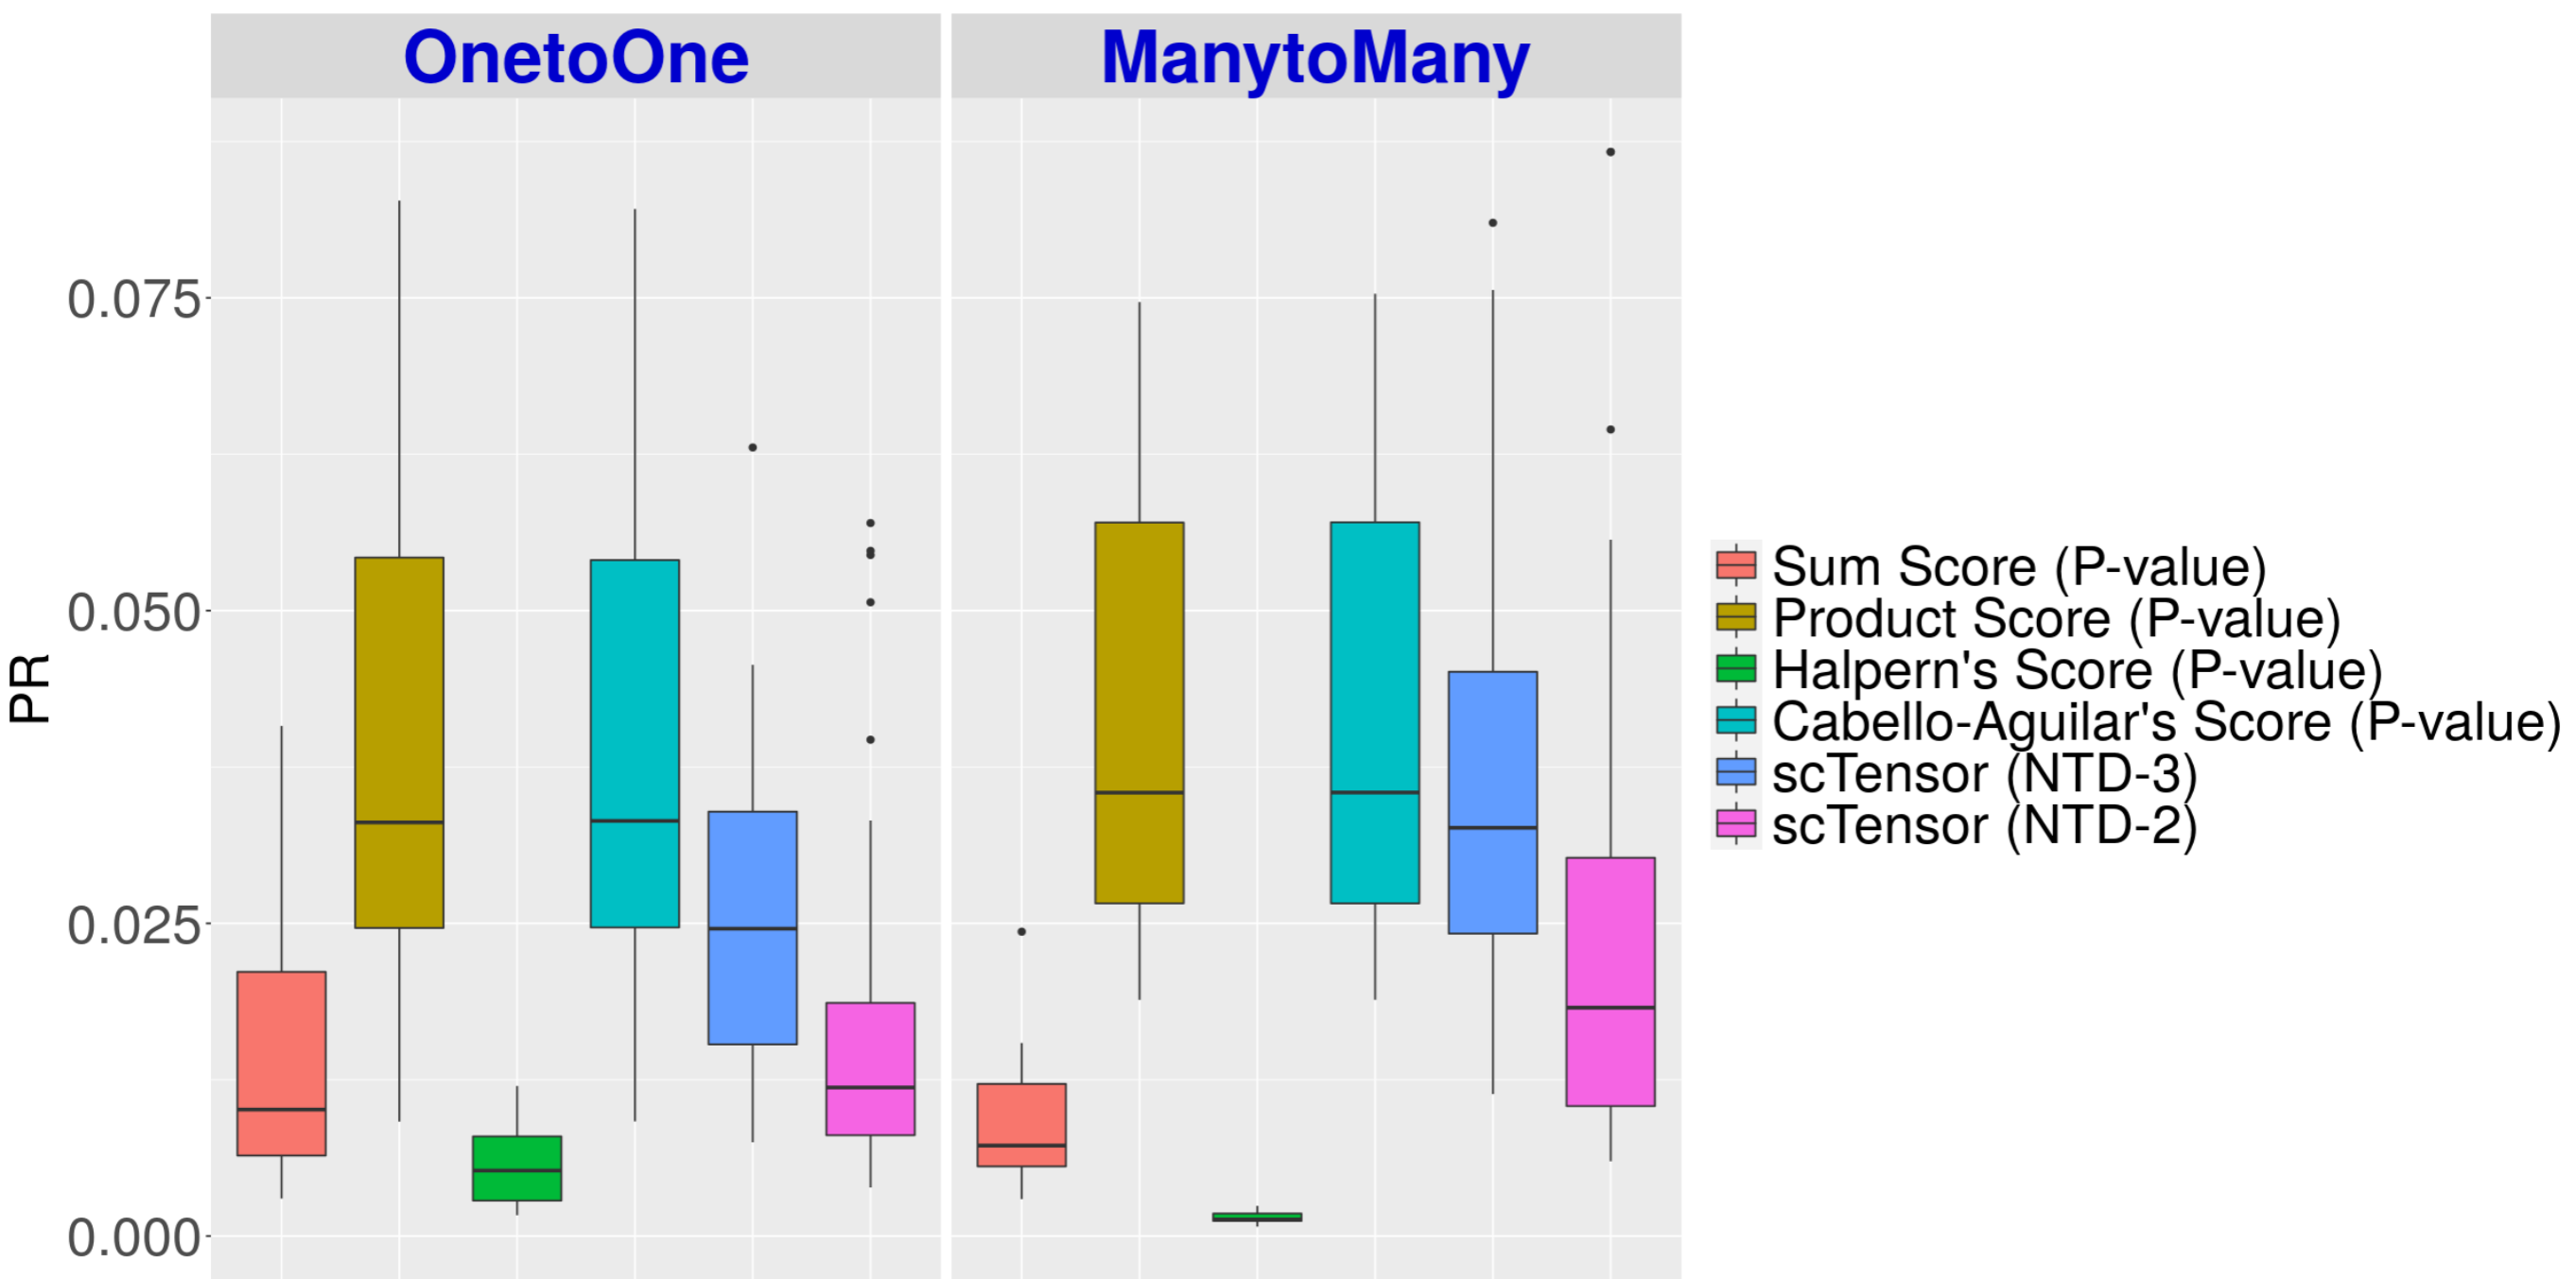

# E2 (Details)

## Sum Score (P-value)

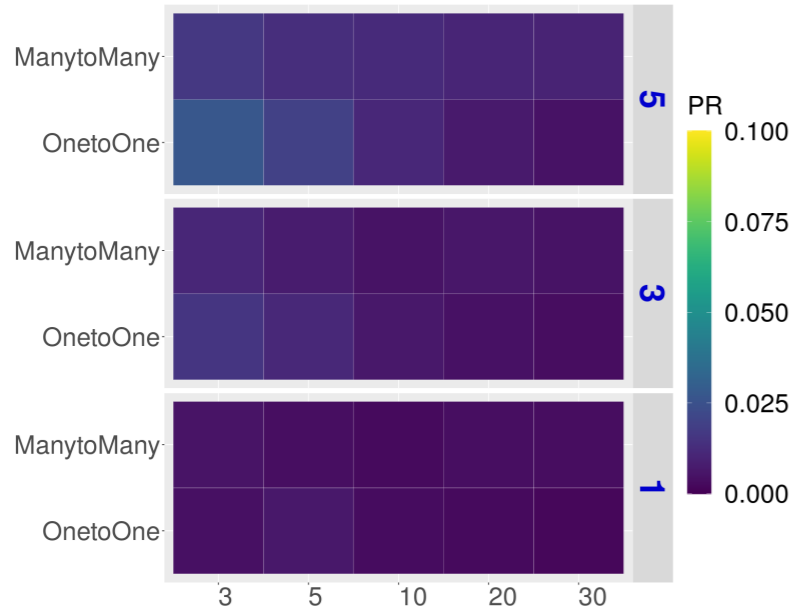

## Halpern's Score (P-value)

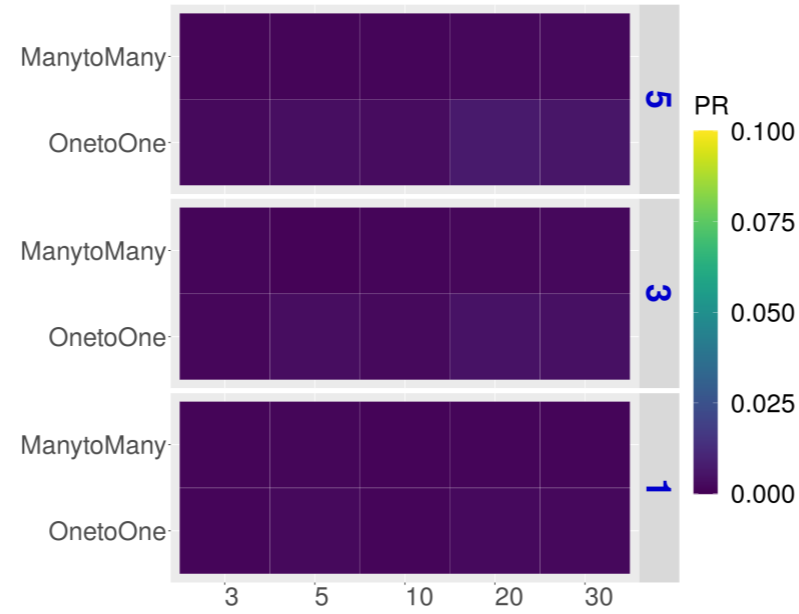

## scTensor (NTD-3)

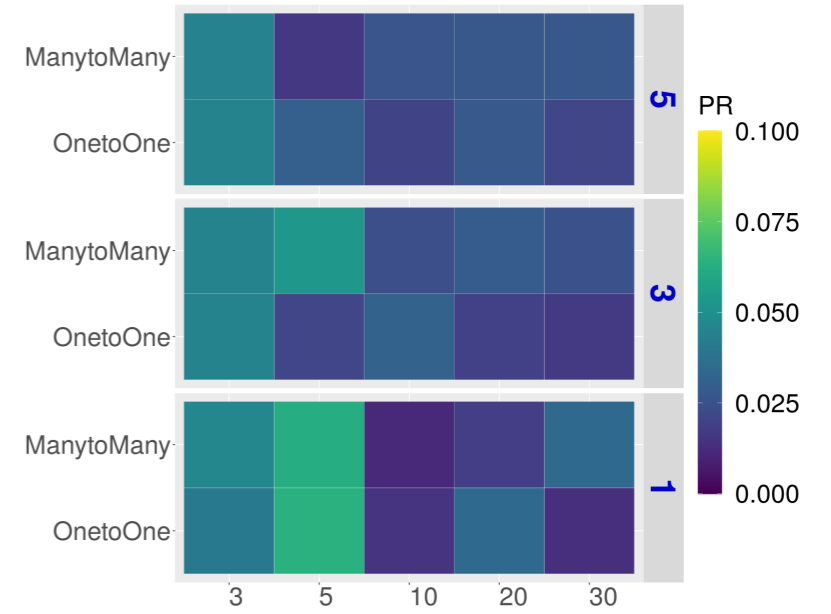

## Product Score (P-value)

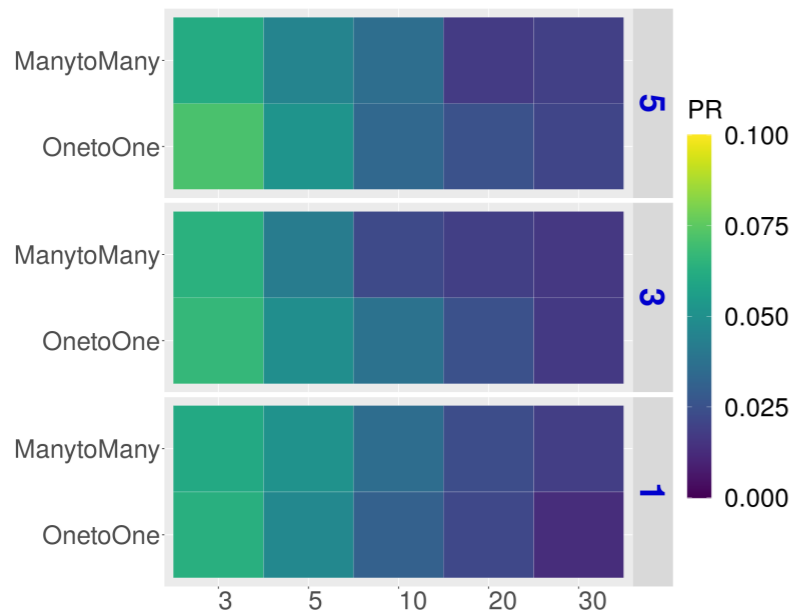

## Cabello-Aguilar's Score (P-value)

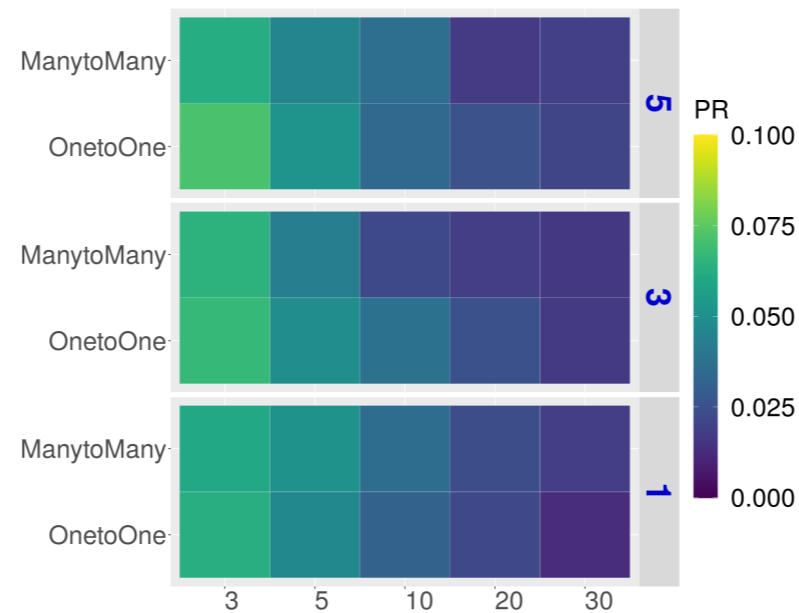

## scTensor (NTD-2)

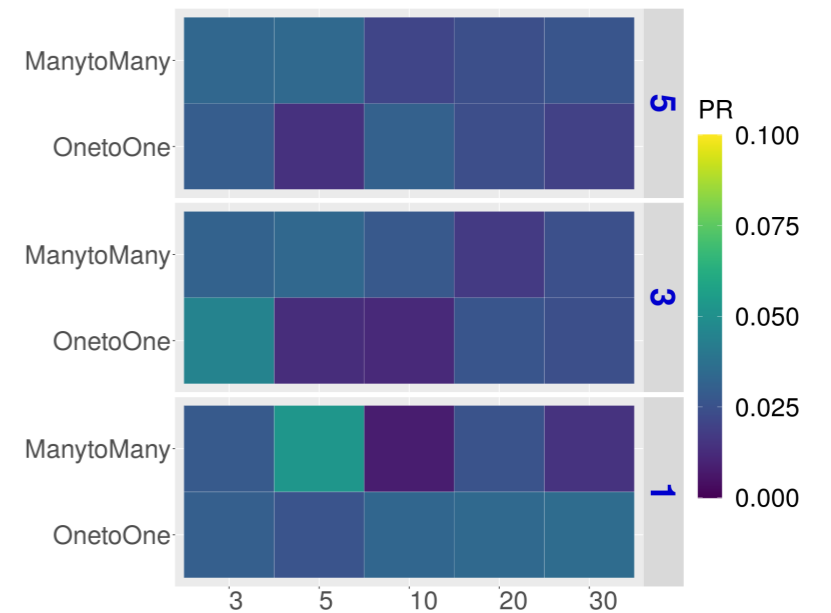

# E5 (Details)

### Sum Score (P-value)

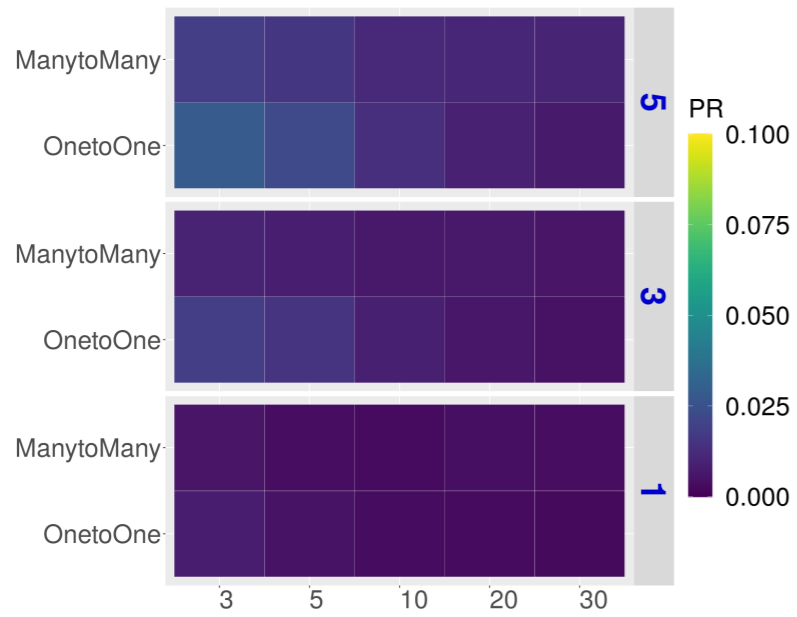

### Halpern's Score (P-value)

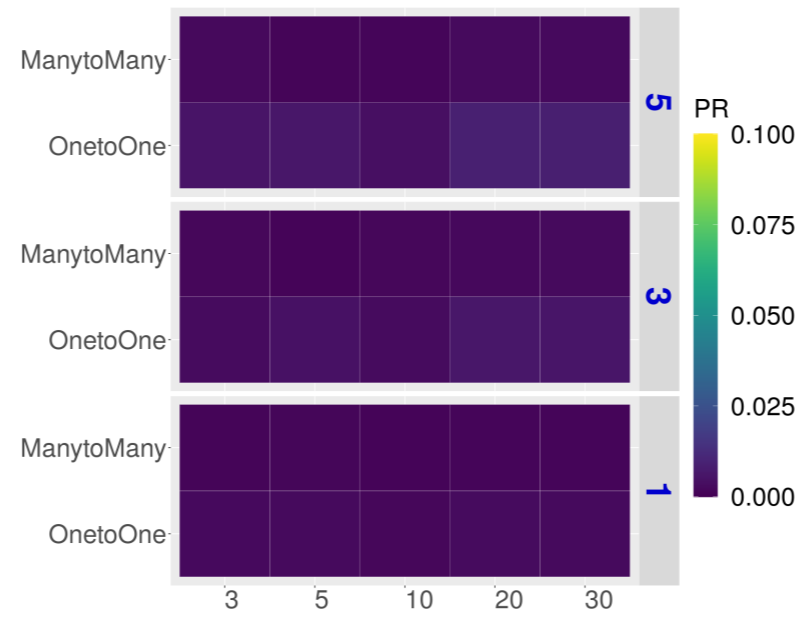

### scTensor (NTD-3)

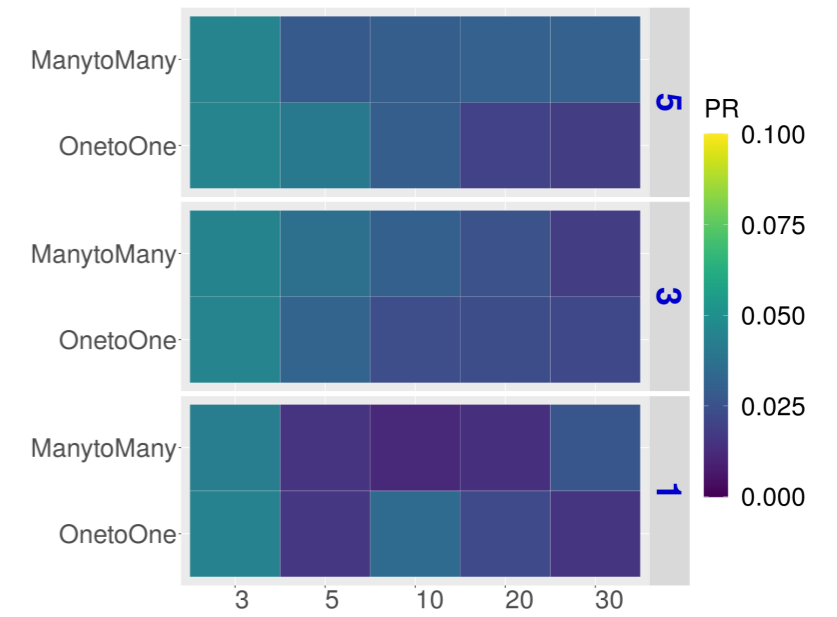

### Product Score (P-value)

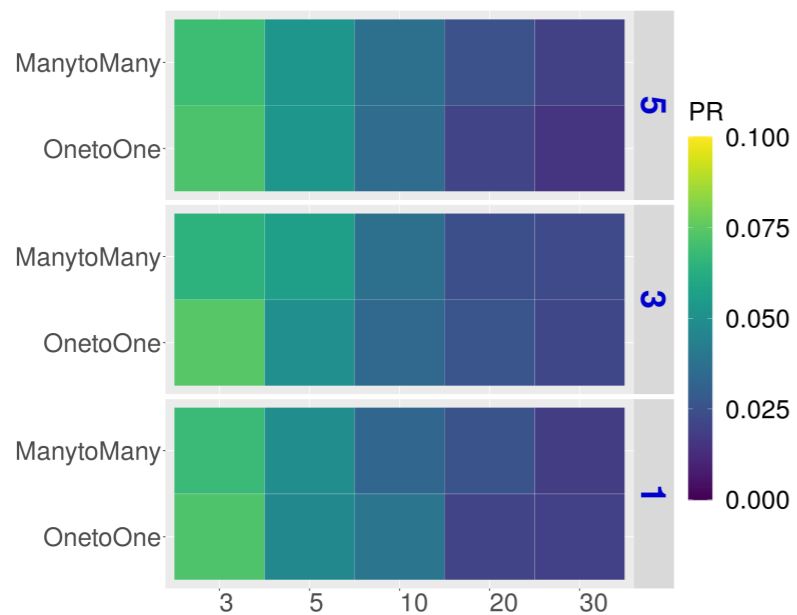

### Cabello-Aguilar's Score (P-value)

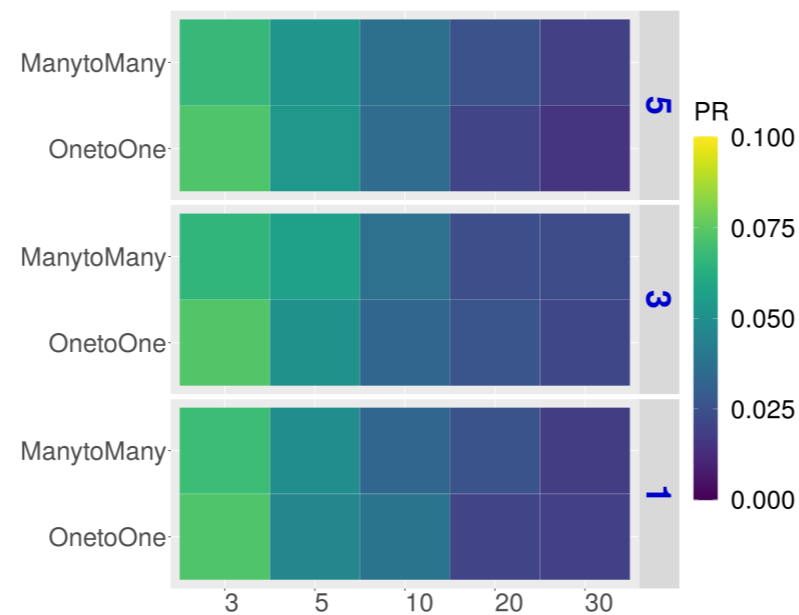

### scTensor (NTD-2)

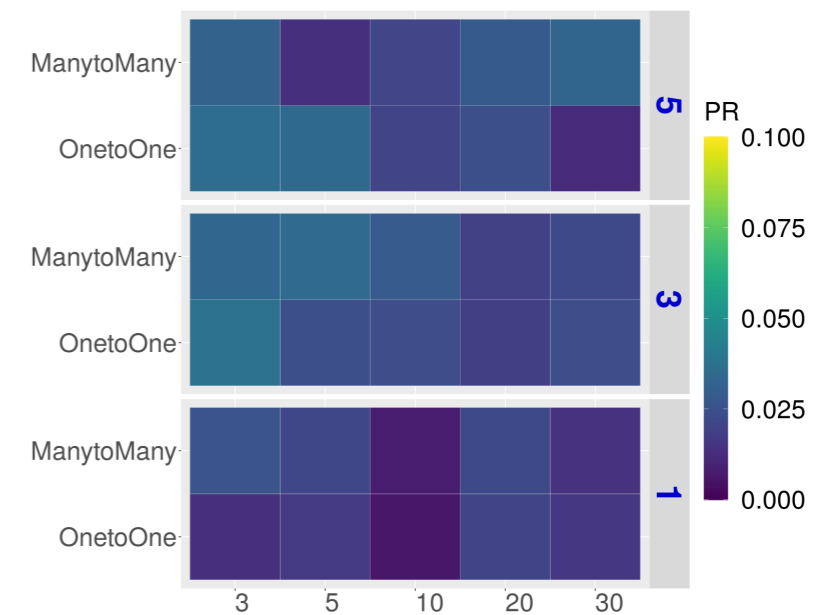

# E10 (Details)

## Sum Score (P-value)

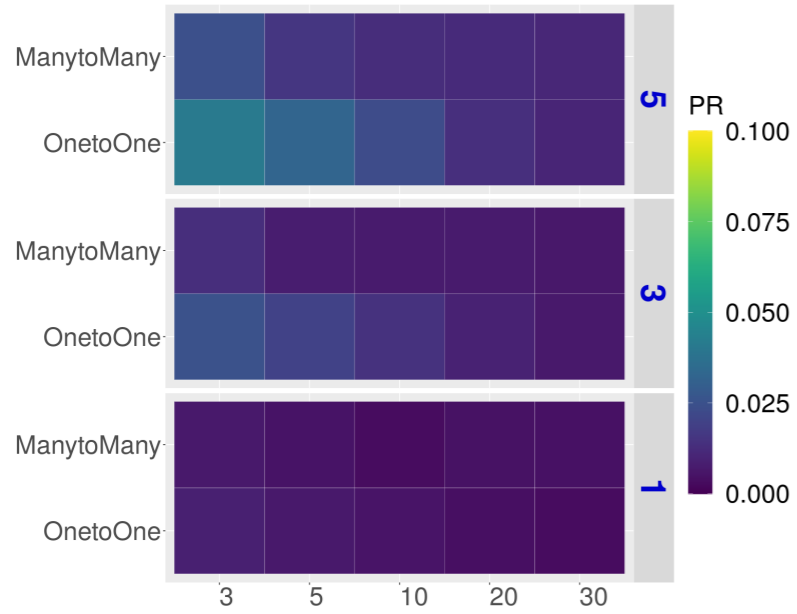

## Halpern's Score (P-value)

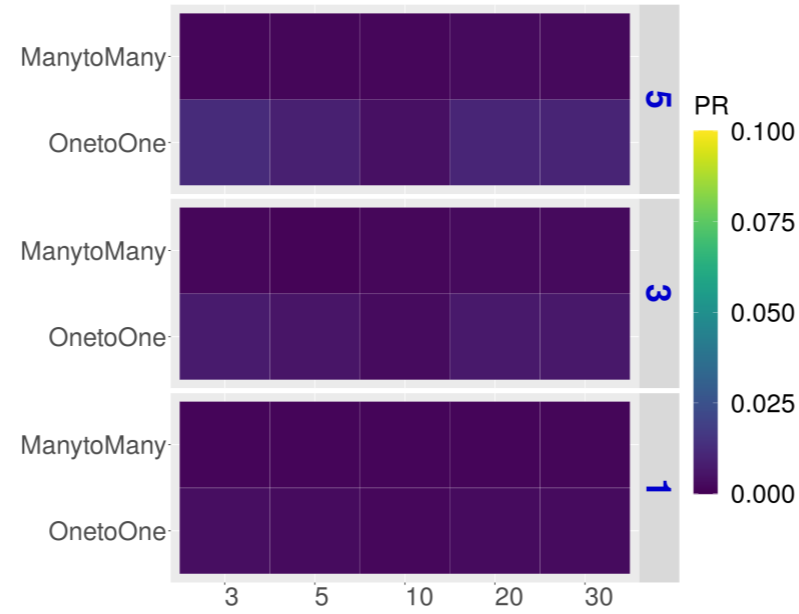

## scTensor (NTD-3)

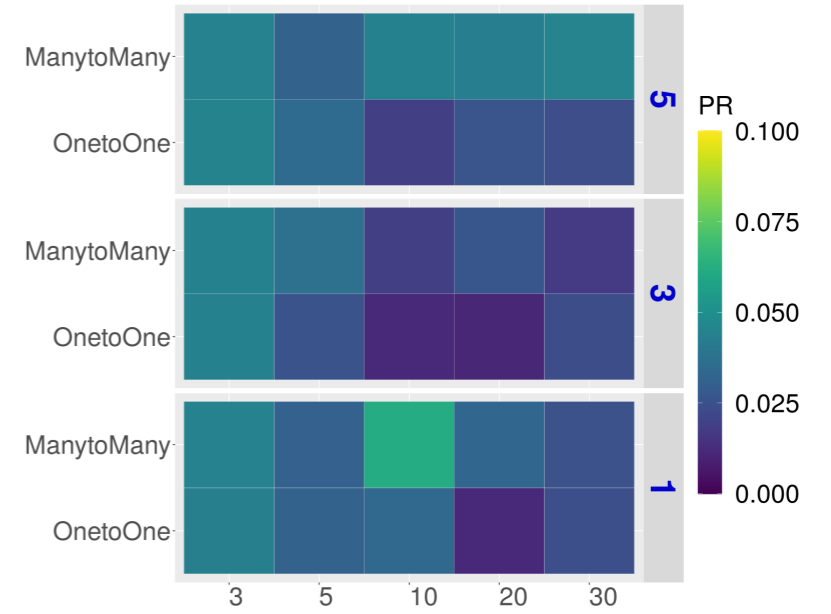

## Product Score (P-value)

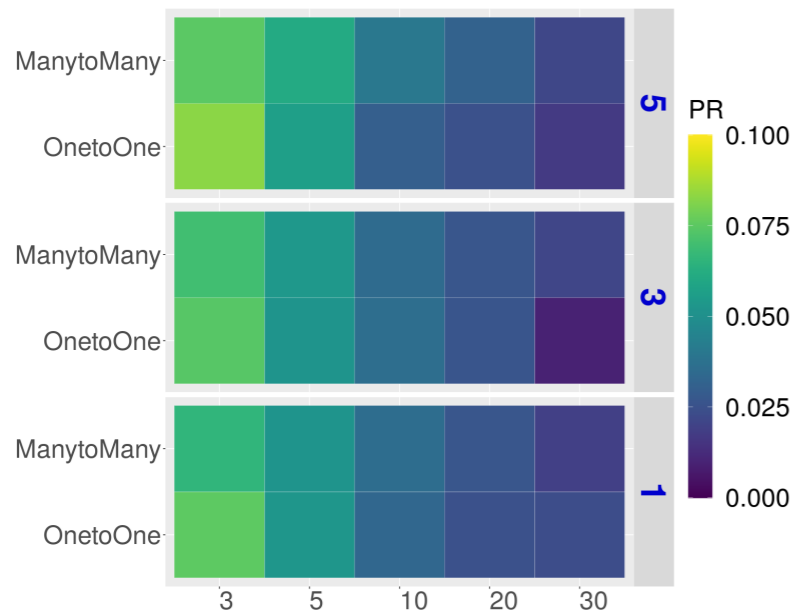

## Cabello-Aguilar's Score (P-value)

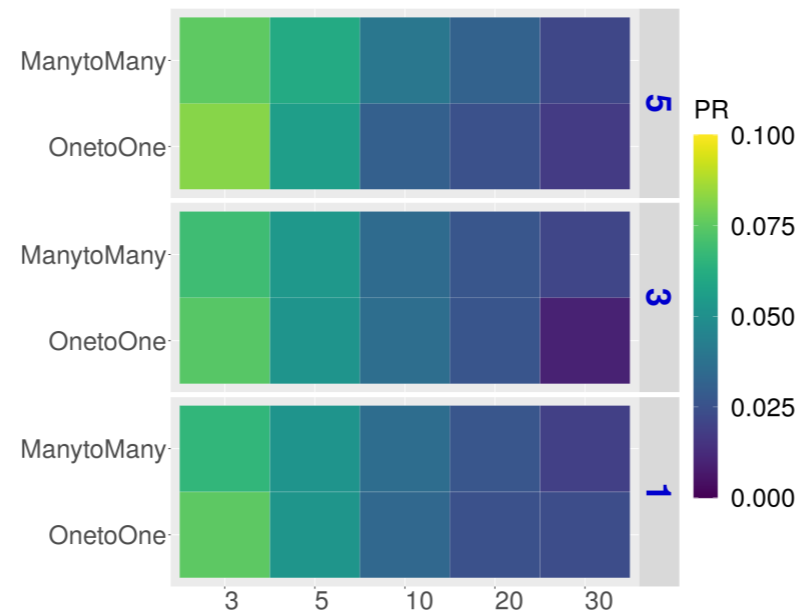

## scTensor (NTD-2)

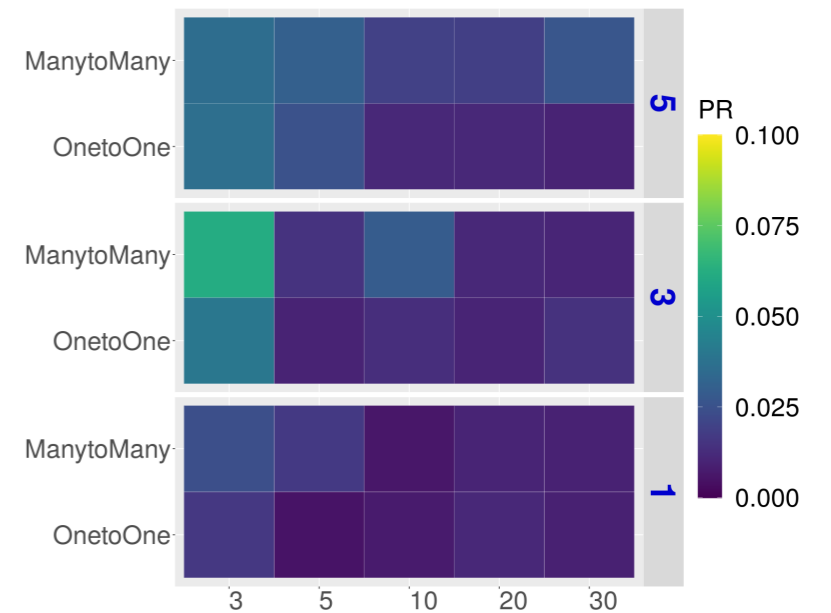

# Real Datasets



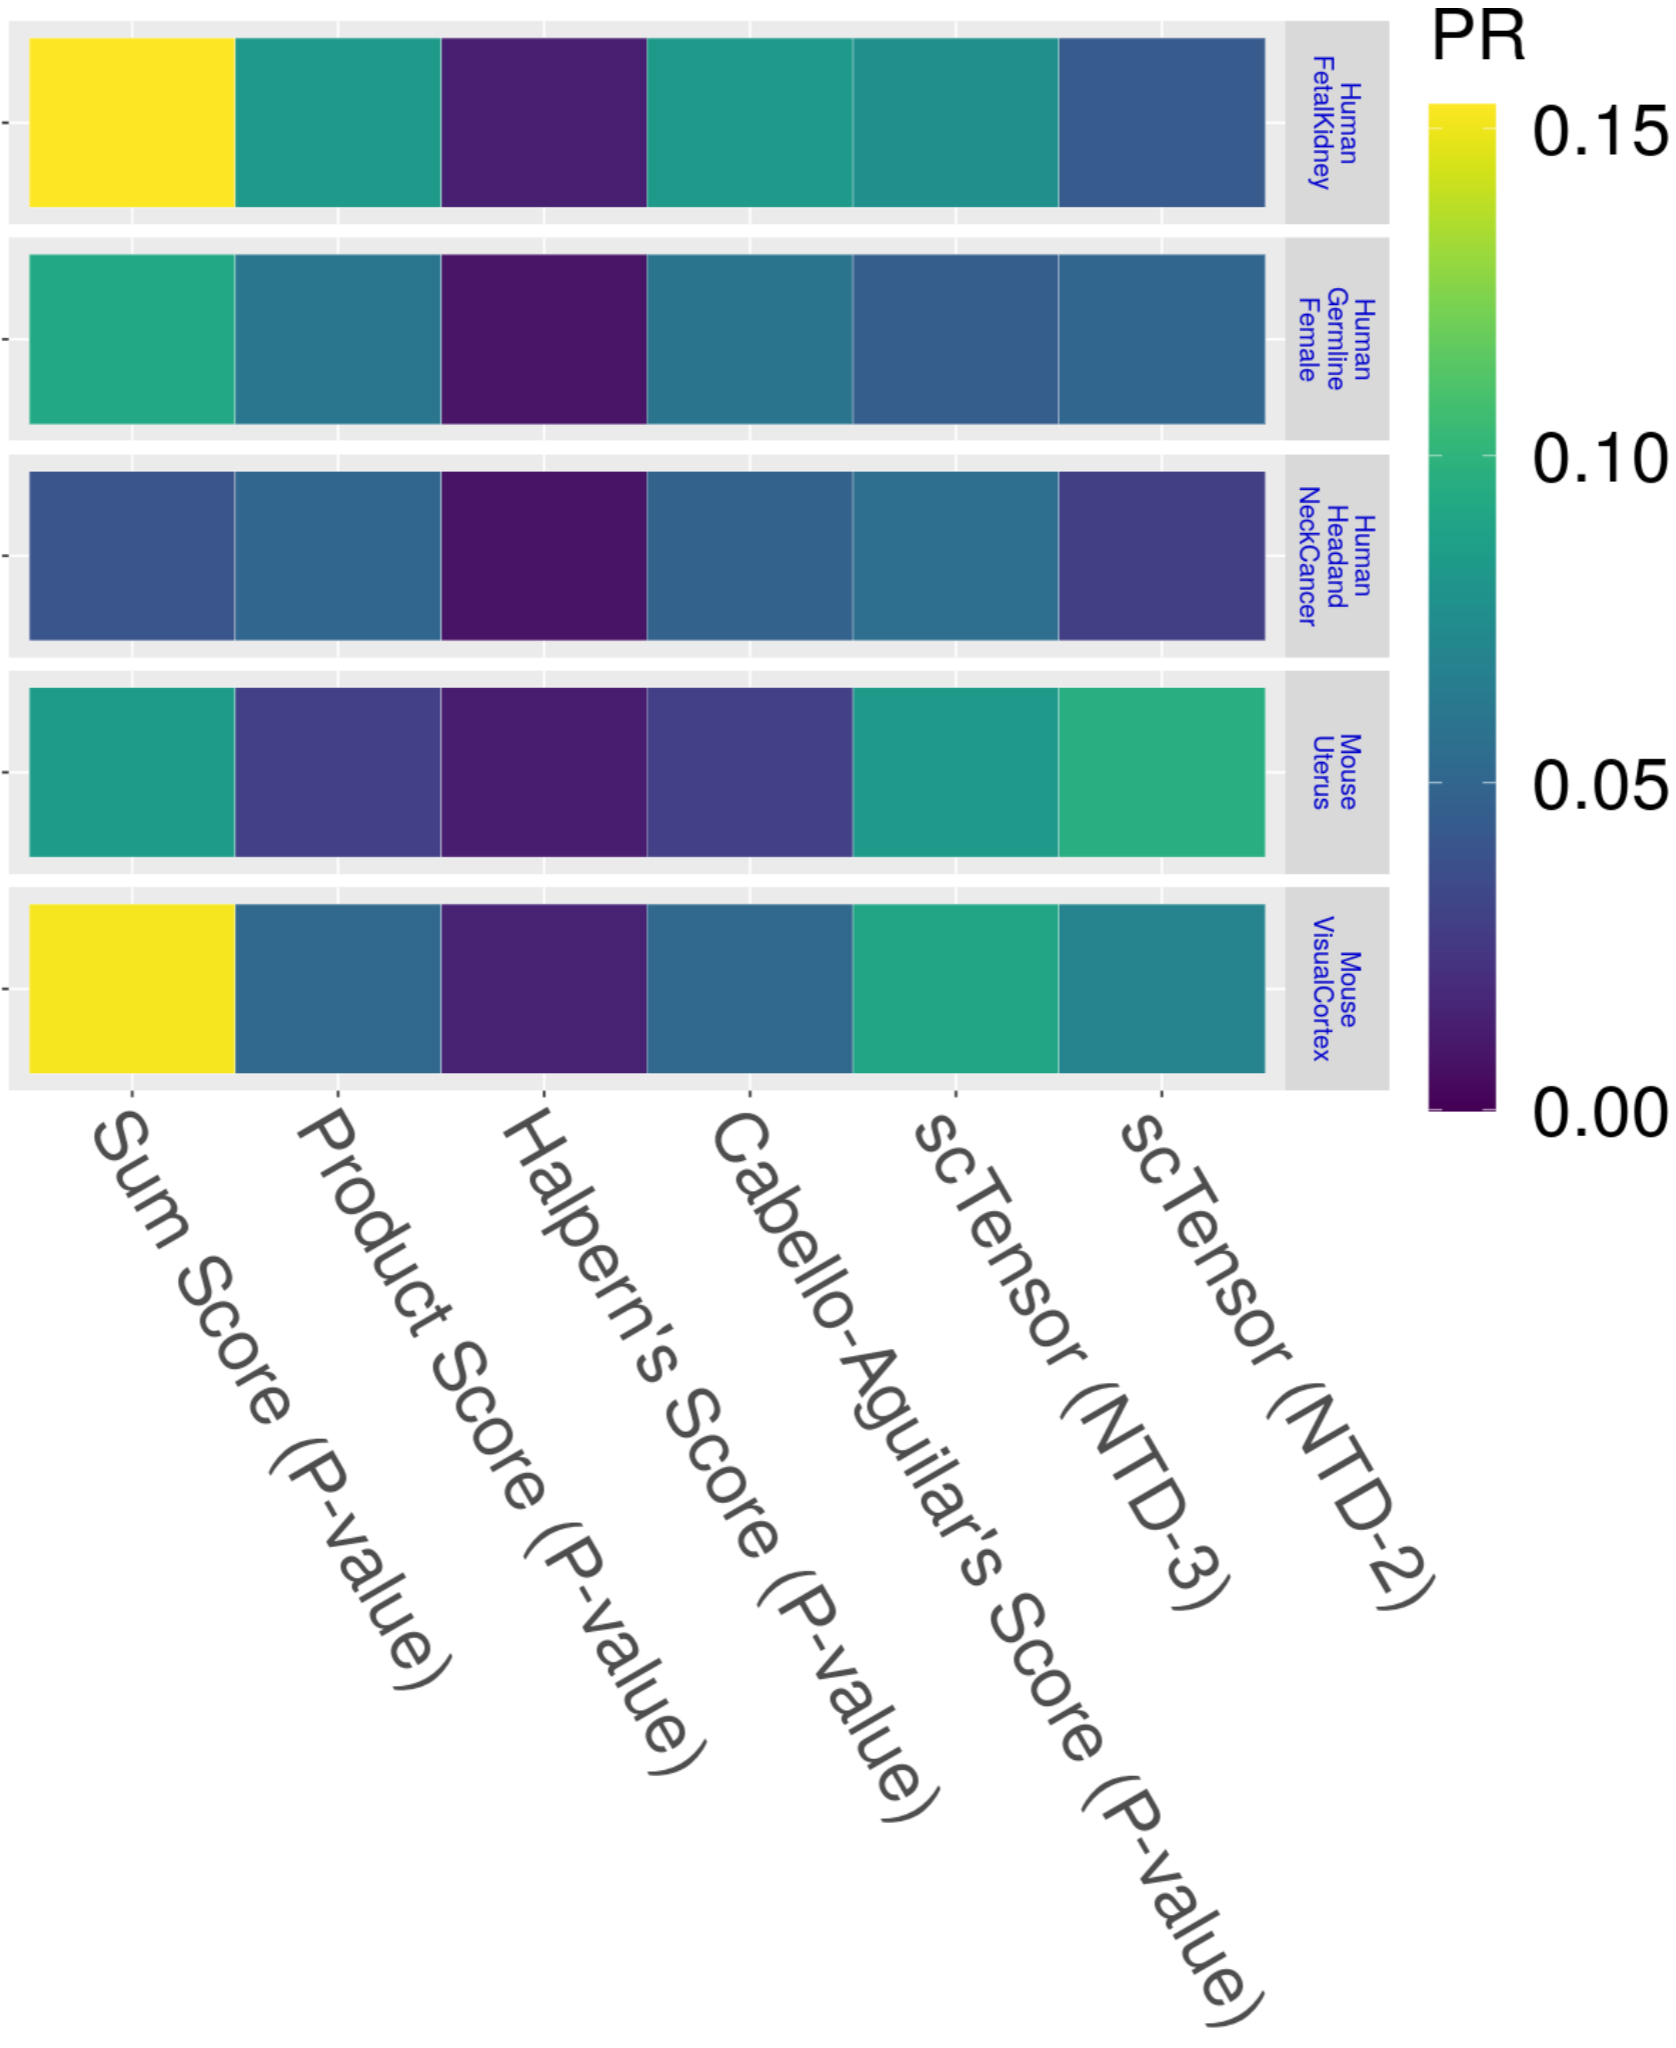

Supplement: 12859_2023_5490_MOESM9_ESM.pdf [file 12859_2023_5490_MOESM9_ESM.pdf]
