# Supplementary material for: Sctensor detects many-to-many cell–cell interactions from single cell RNA-sequencing data
Source: Springer Nature journal article supplement (doi:10.1186/s12859-023-05490-y), 2023-11-07

# Simulated Datasets

## E2 (Summary)

The value ranges 0 to 1 (the closer to 1, the better)

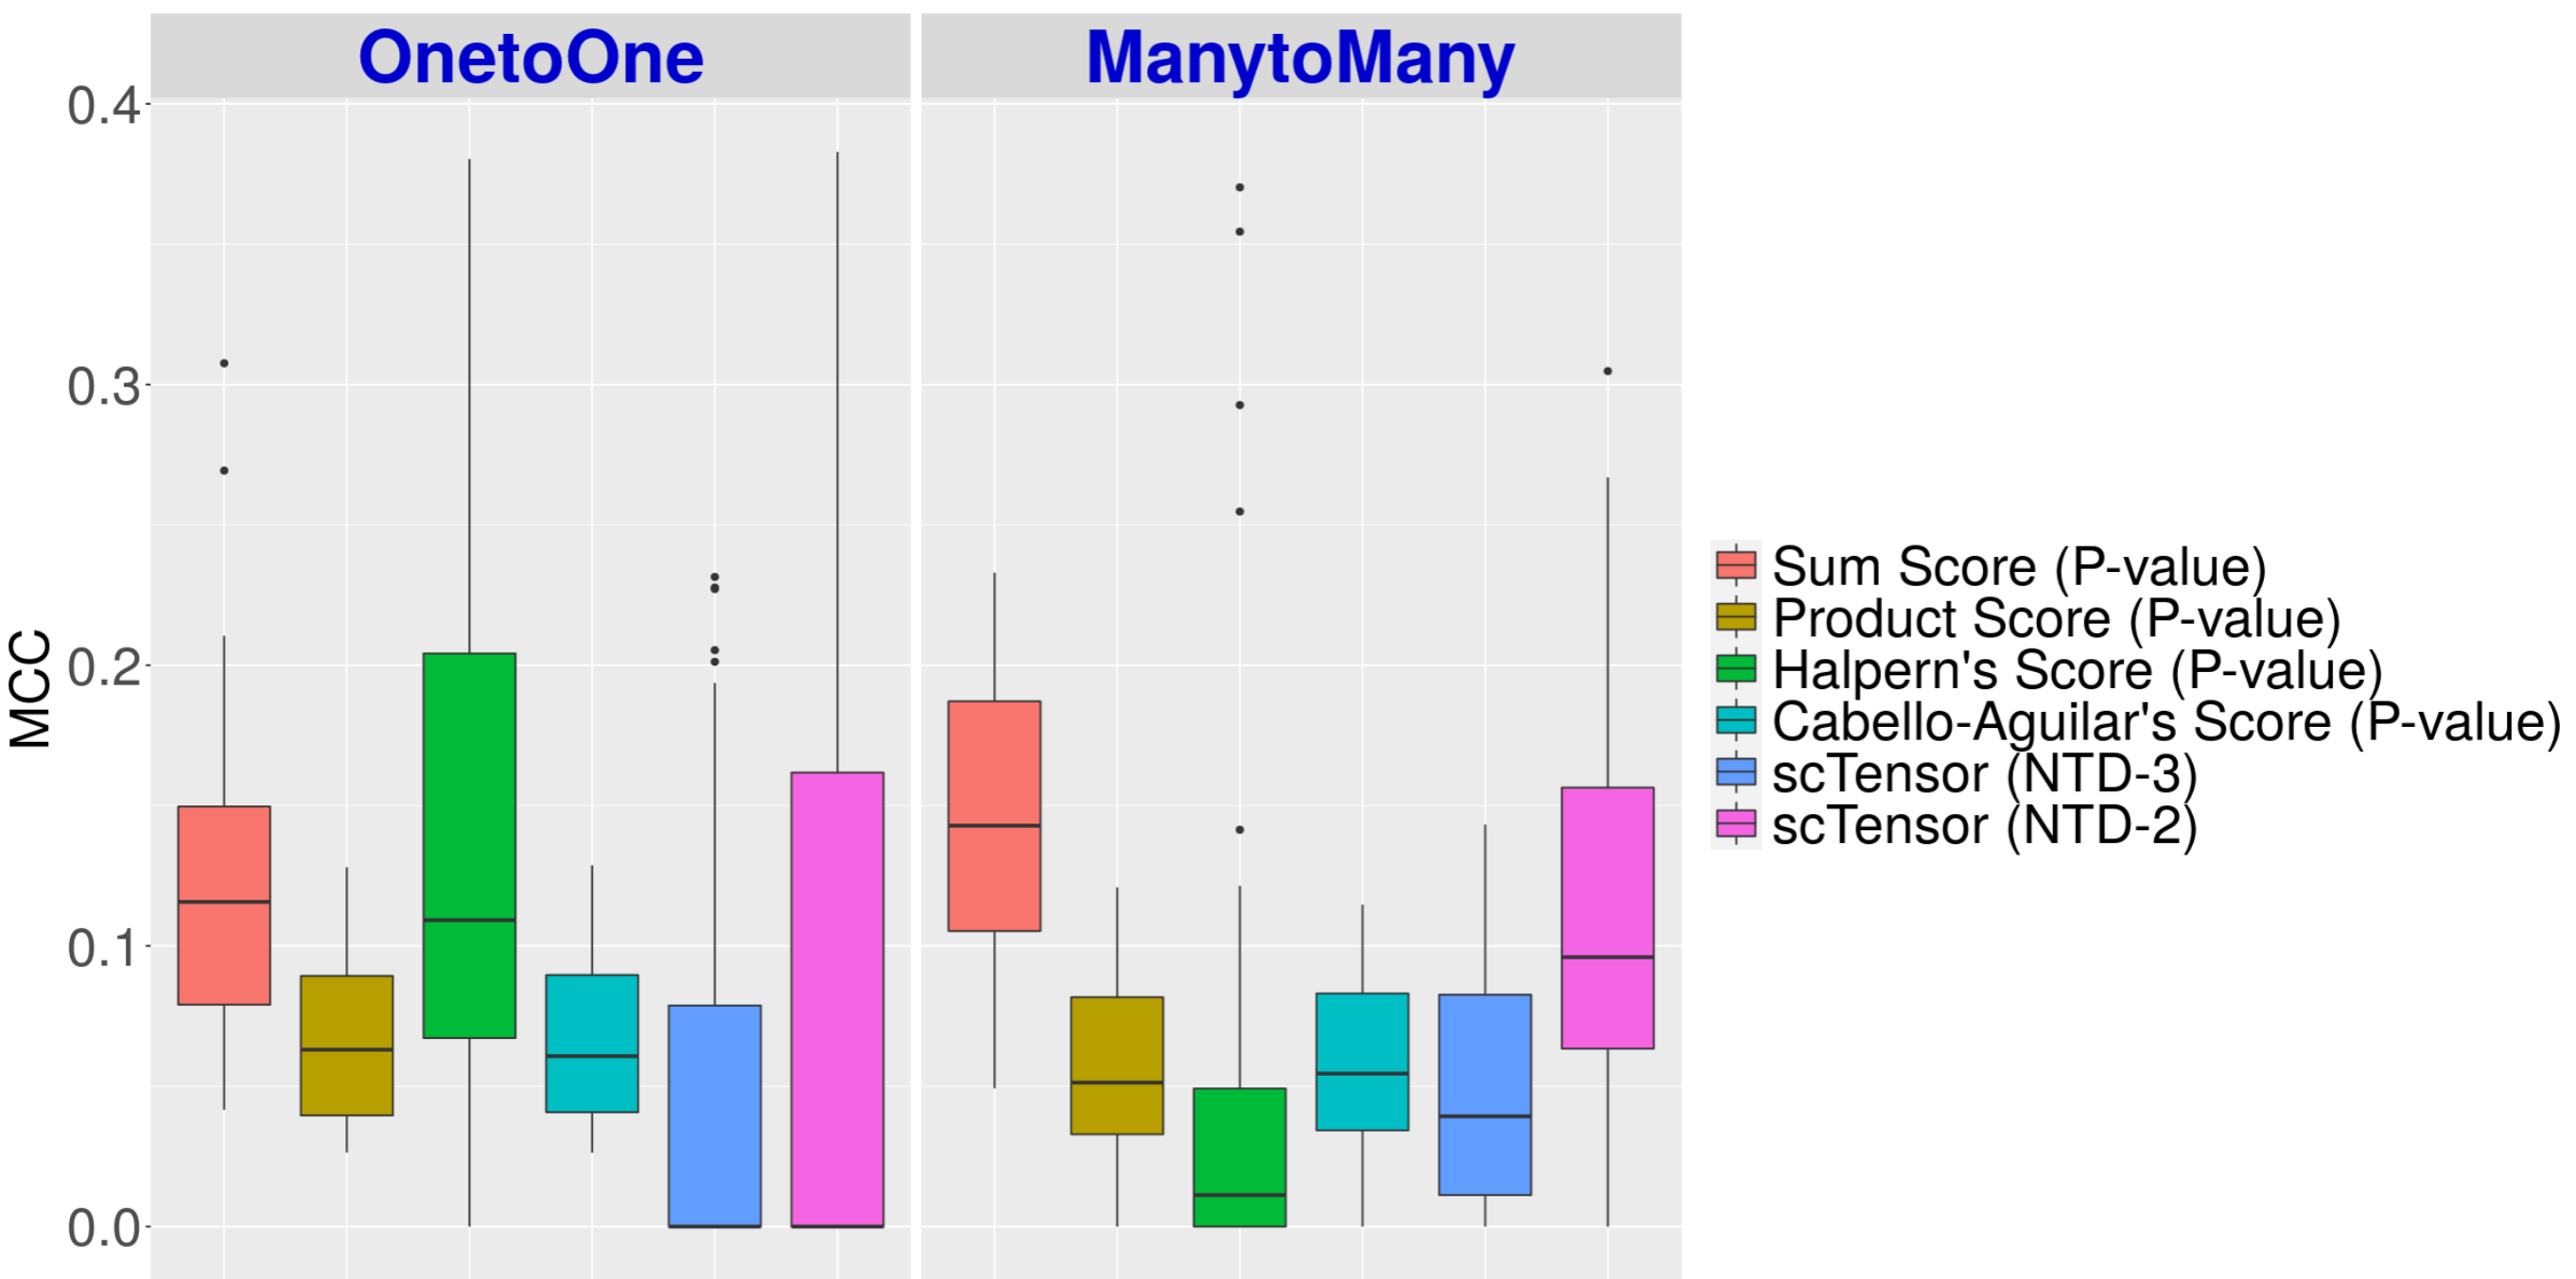

# E5 (Summary)

The value ranges 0 to 1 (the closer to 1, the better)

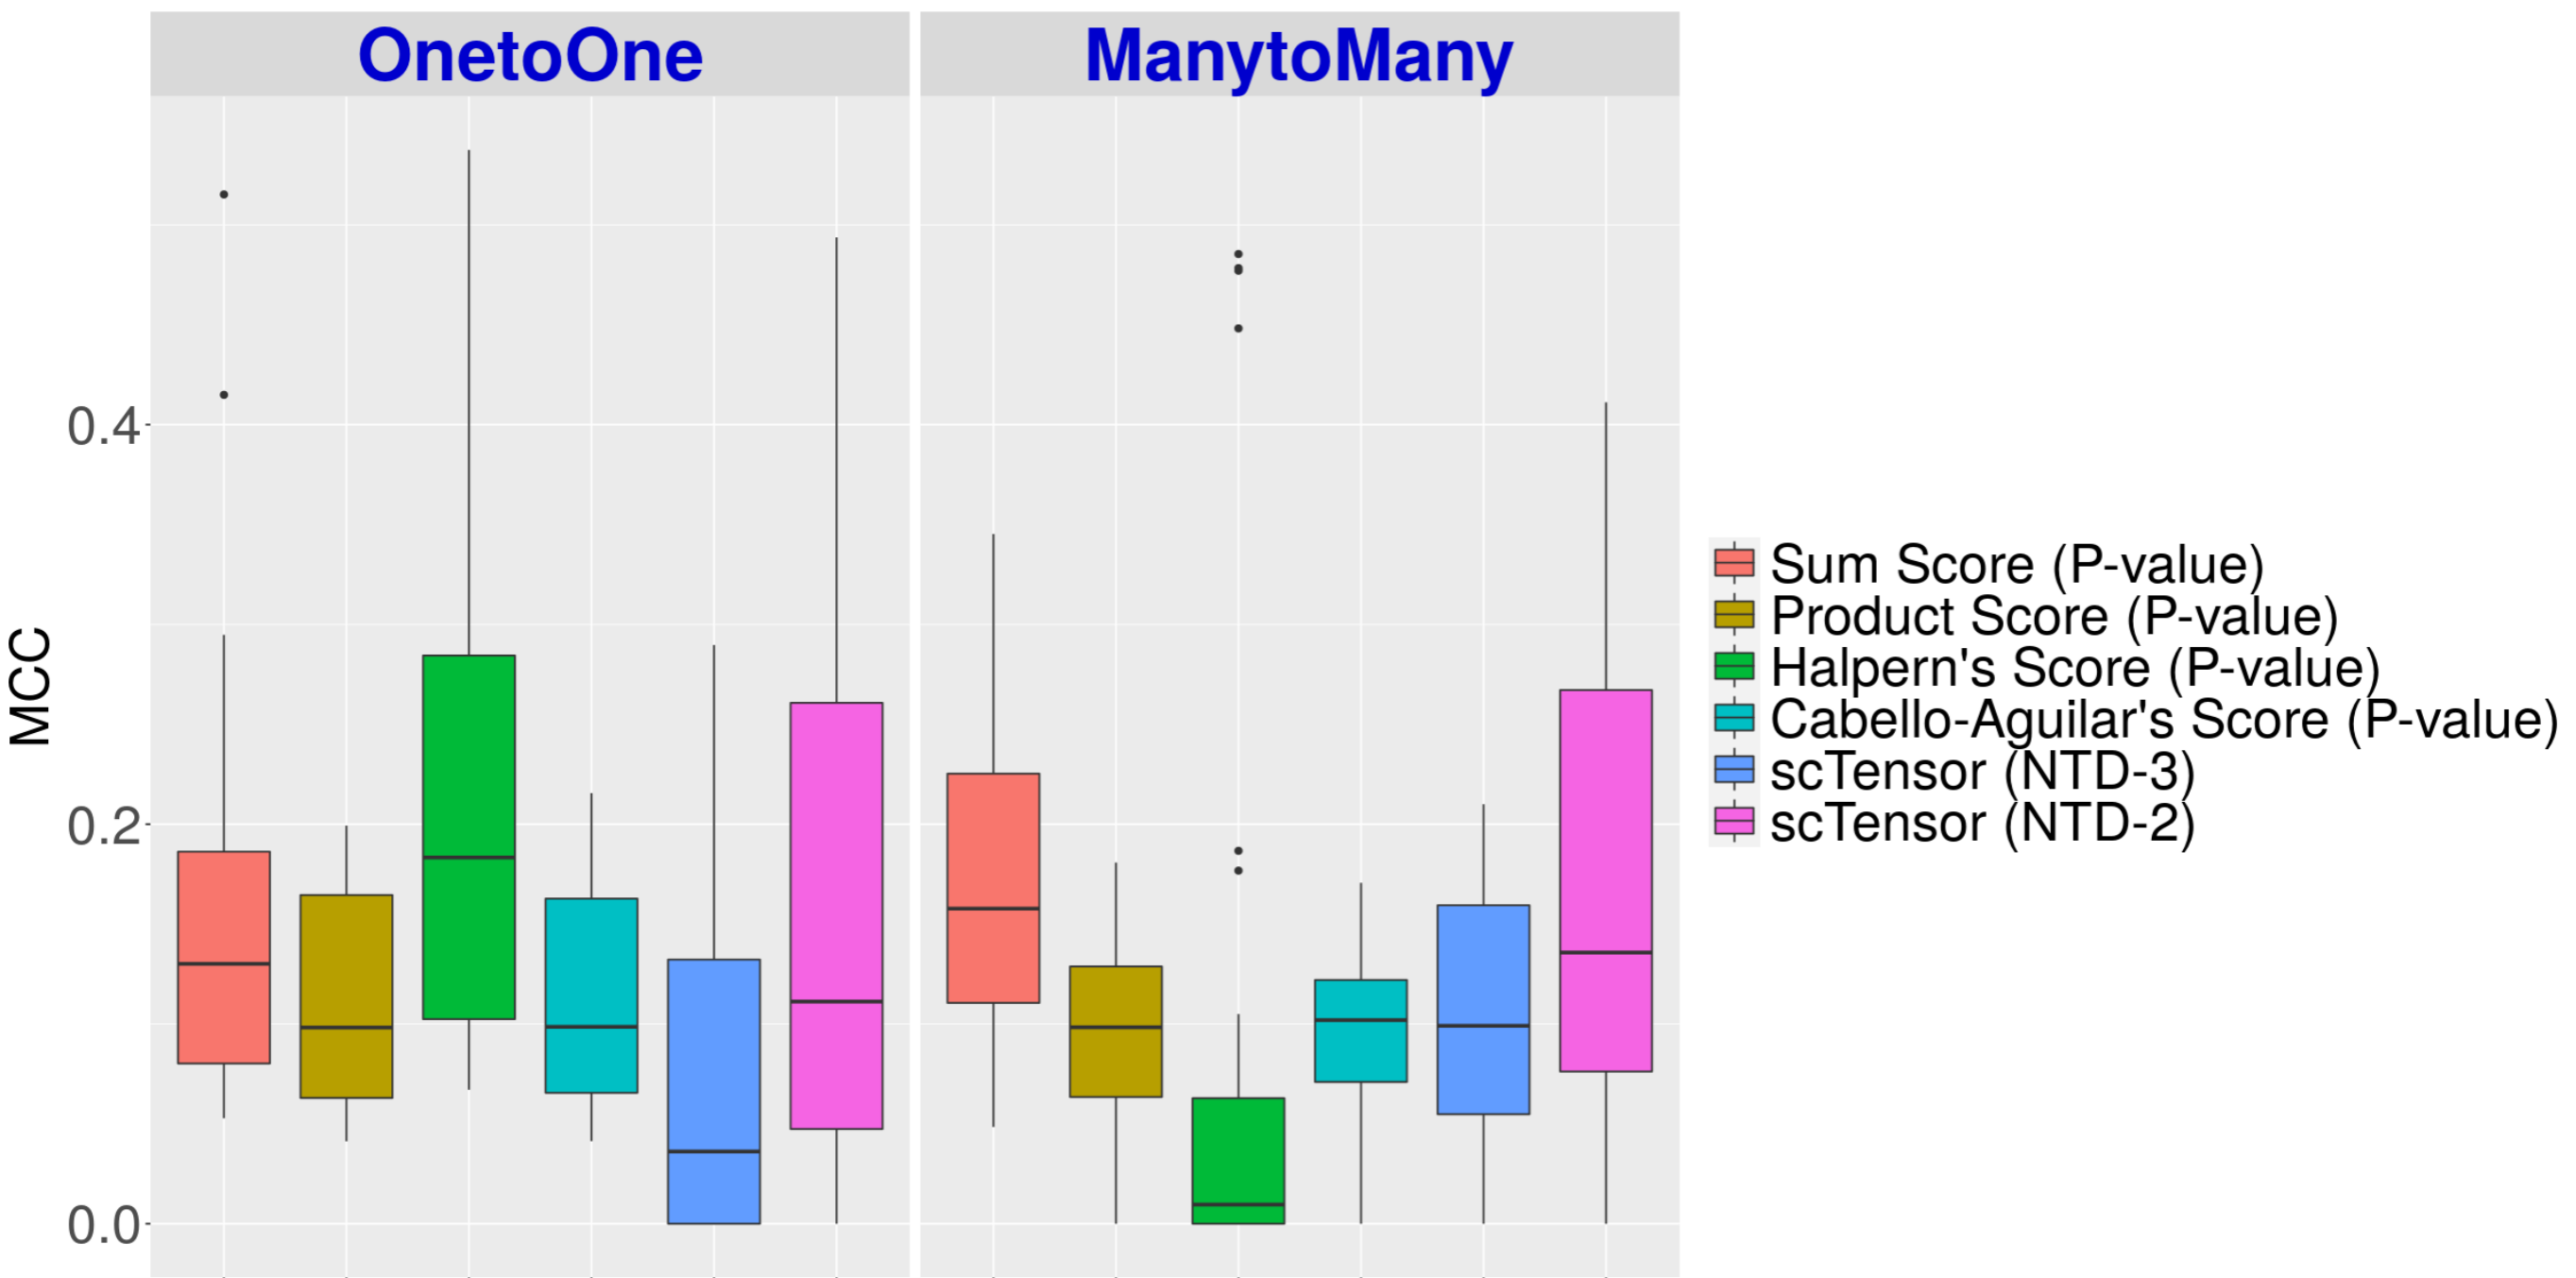

# E10 (Summary)

The value ranges 0 to 1 (the closer to 1, the better)

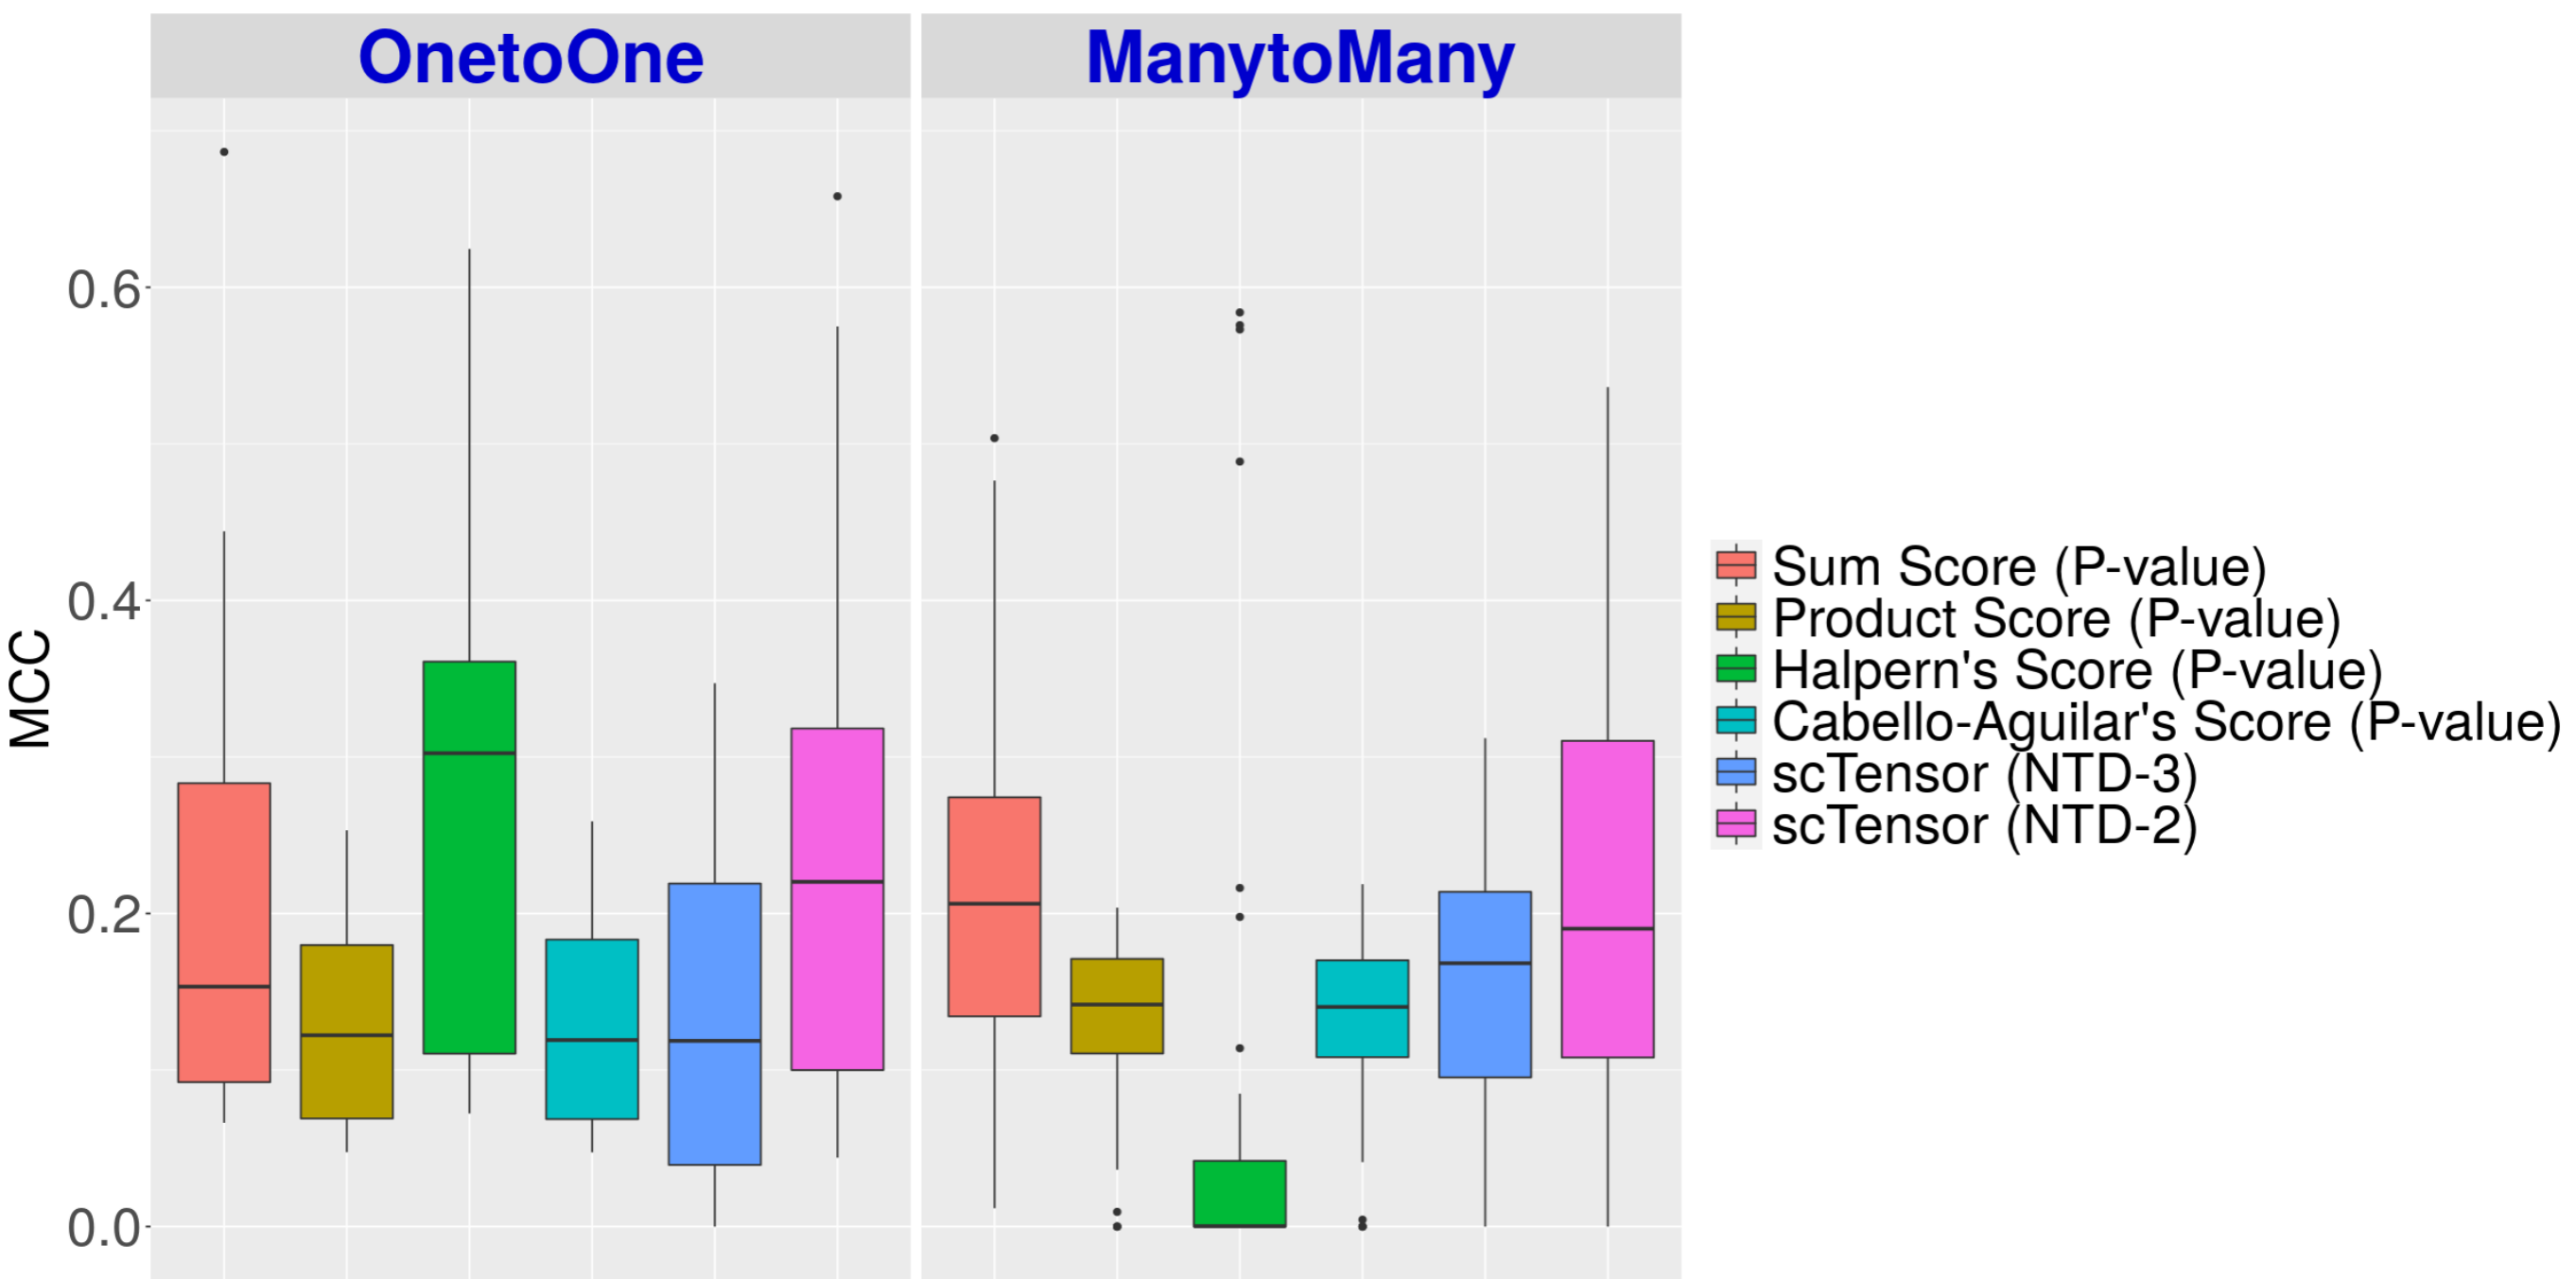

## E2 (Details)

The value ranges 0 to 1 (the closer to 1, the better)

These may only work in certain cases  
but overall these do not work well.

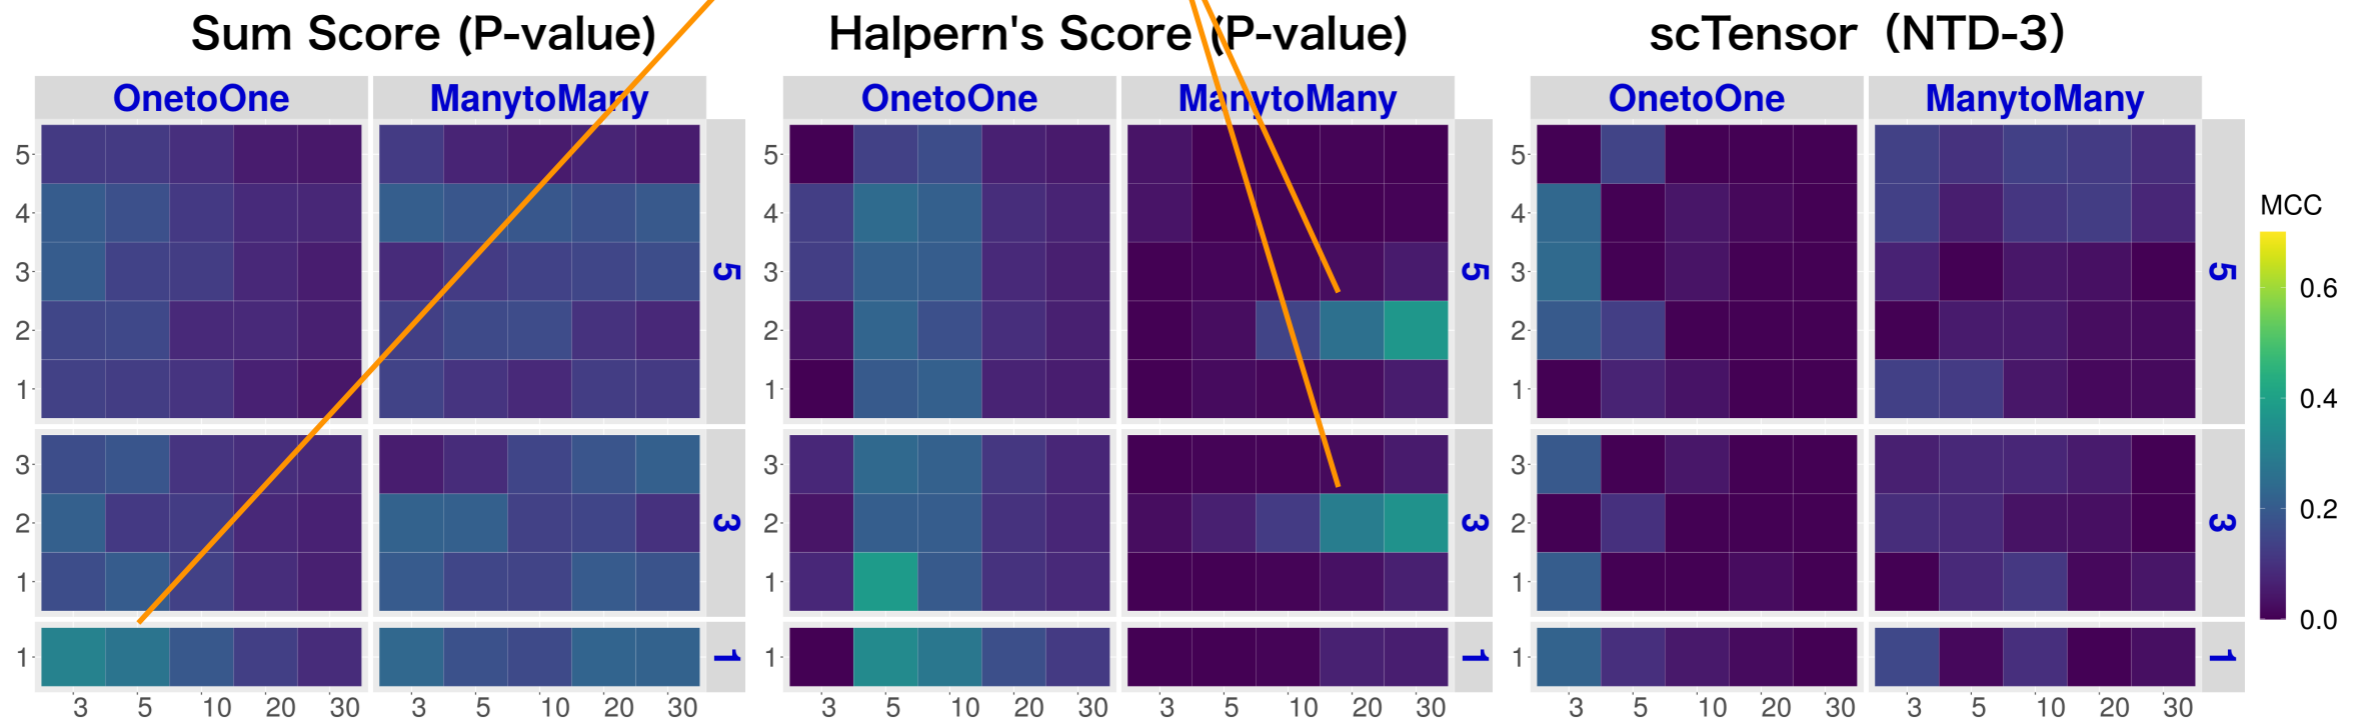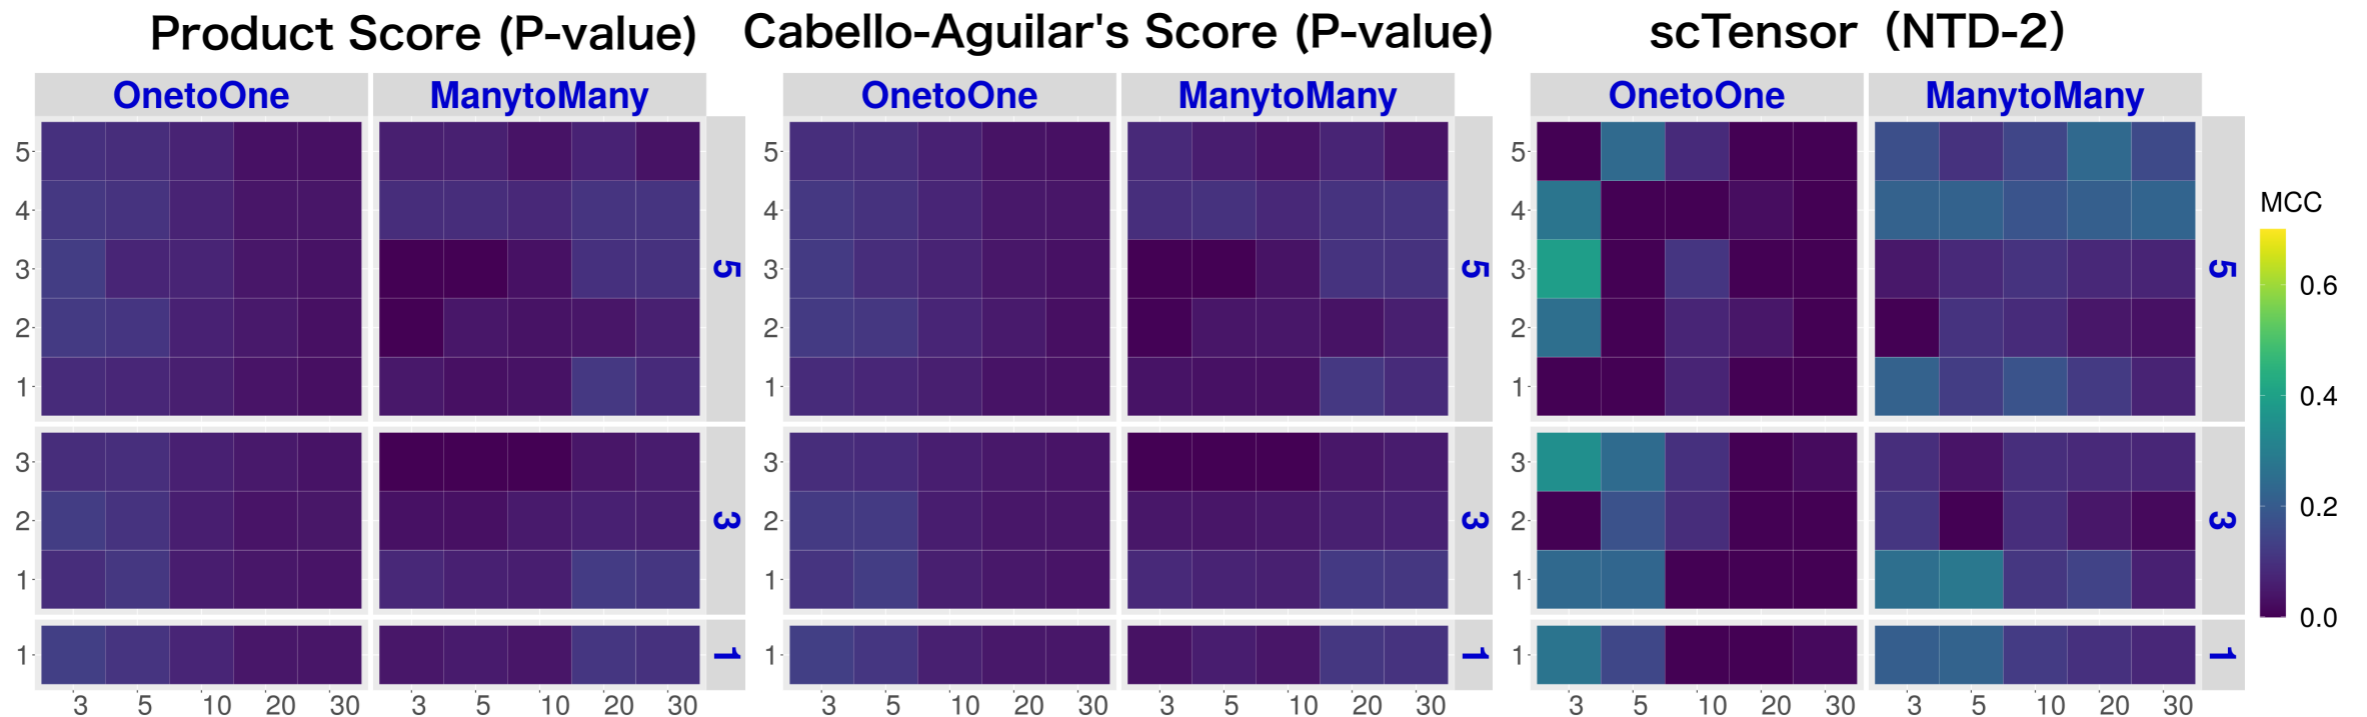

Stable in both 1 vs 1  
and many vs many

# E5 (Details)

The value ranges 0 to 1 (the closer to 1, the better)

These may only work in certain cases  
but overall these do not work well.

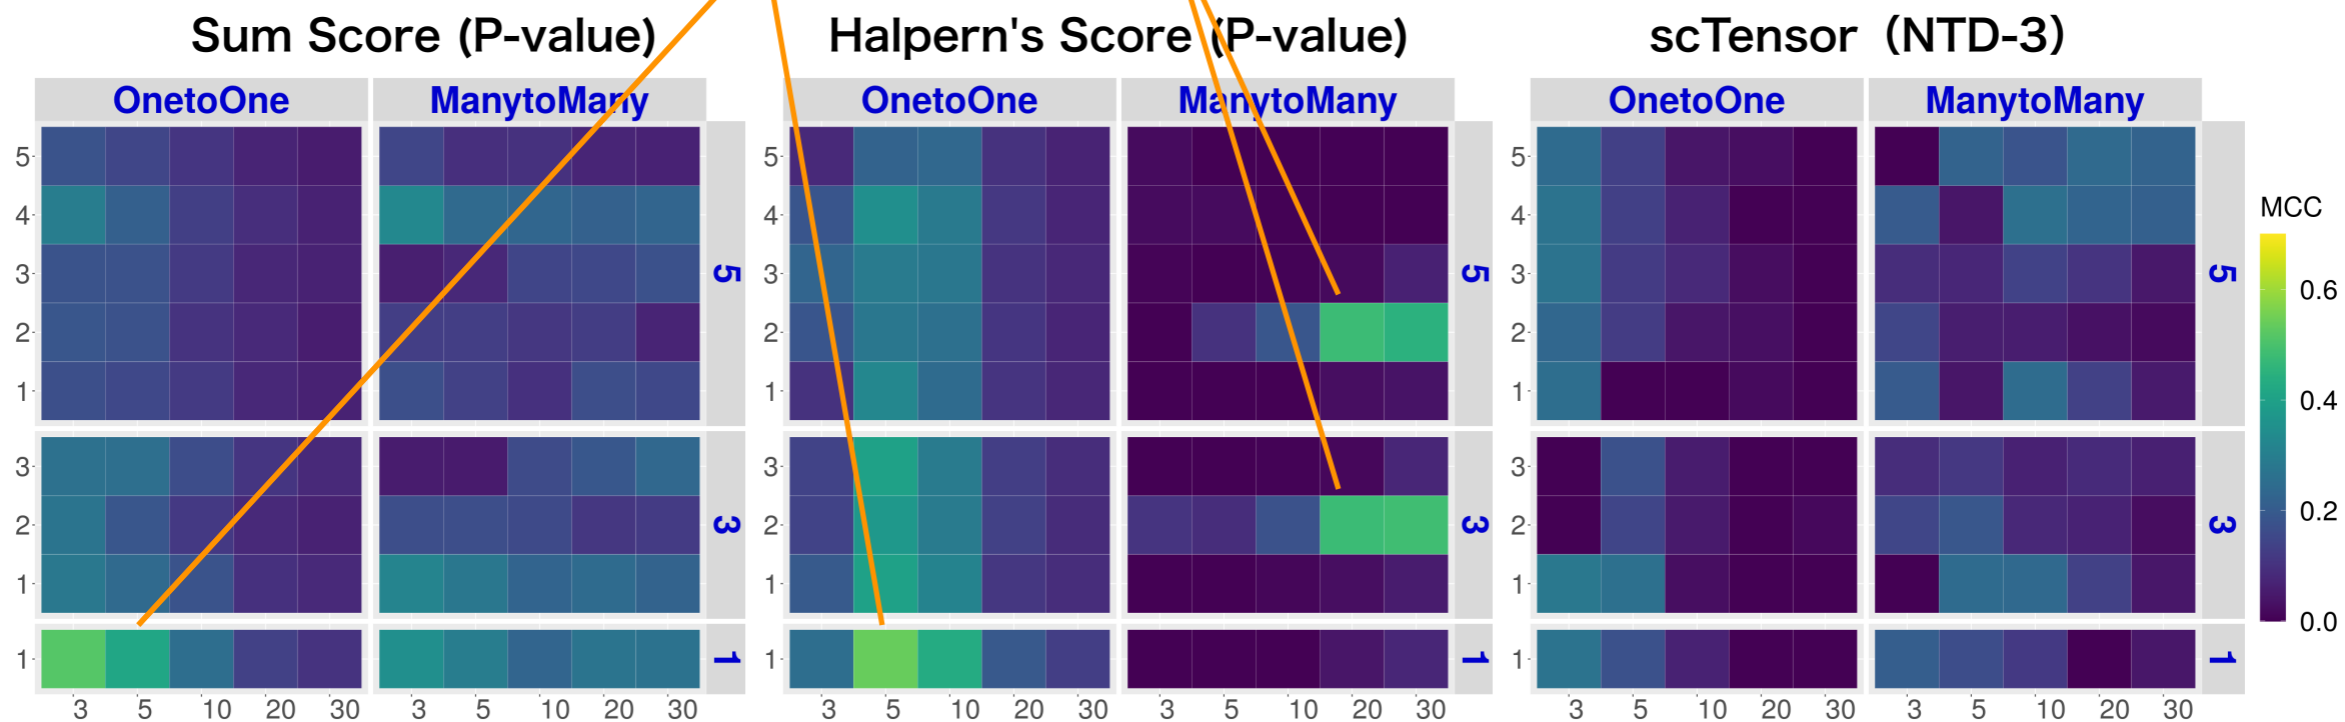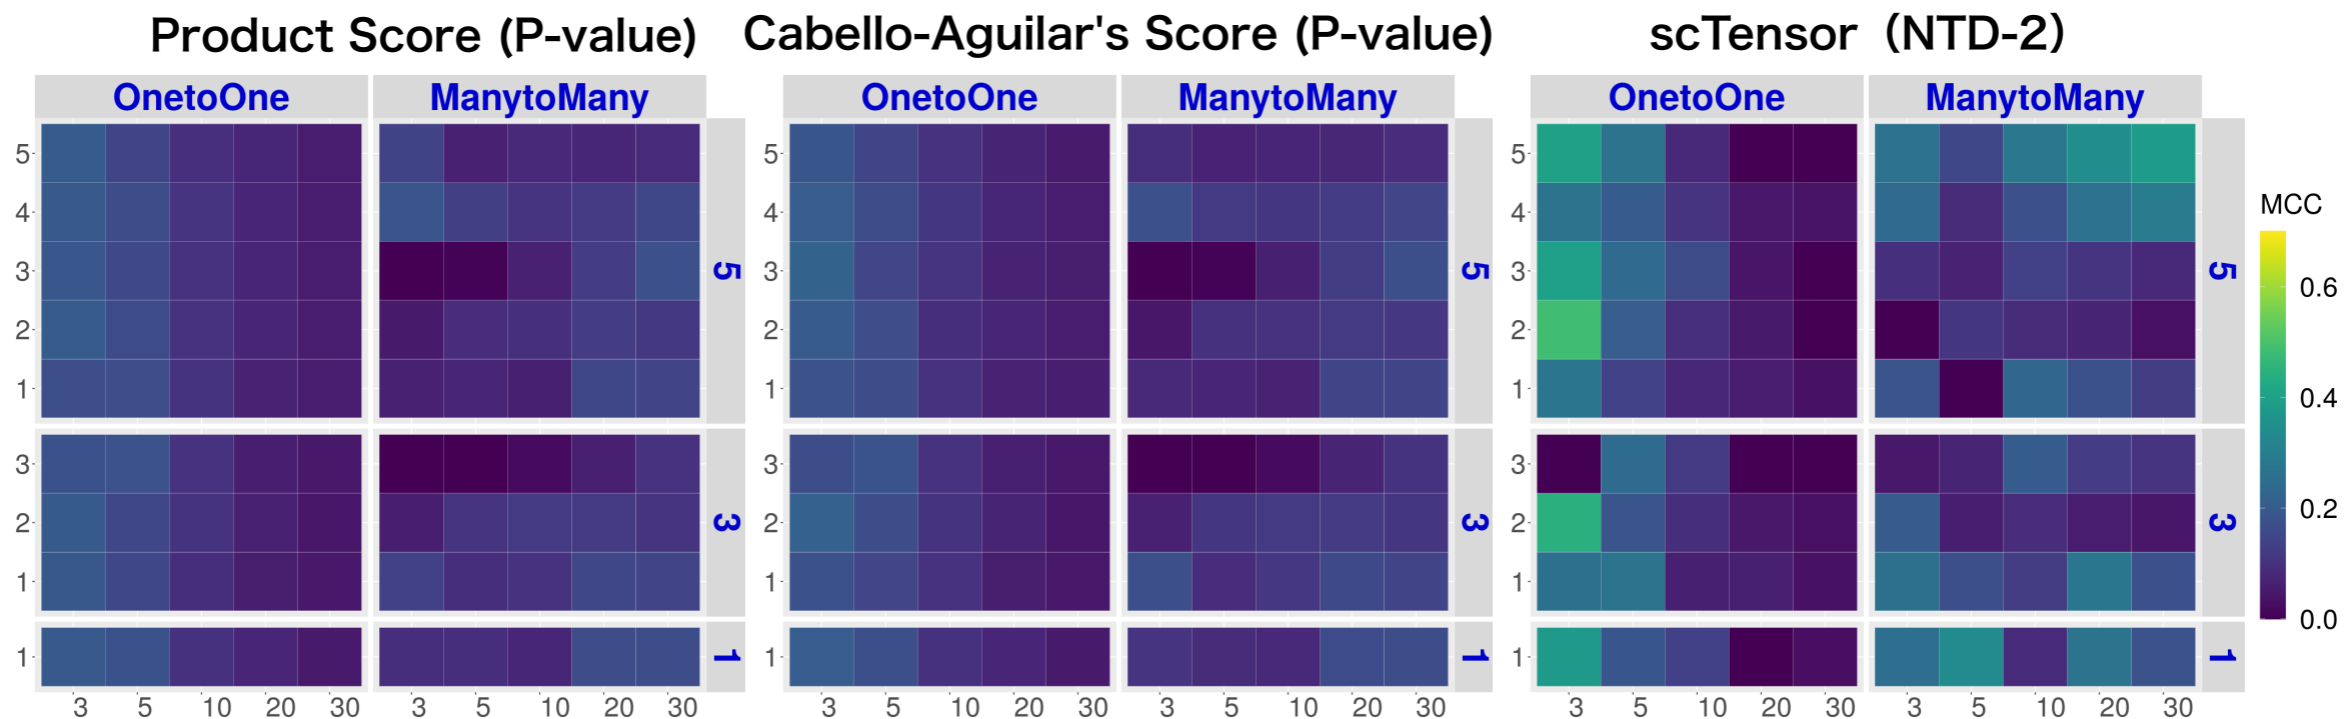

Stable in both 1 vs 1  
and many vs many

# E10 (Details)

The value ranges 0 to 1 (the closer to 1, the better)

These may only work in certain cases  
but overall these do not work well.

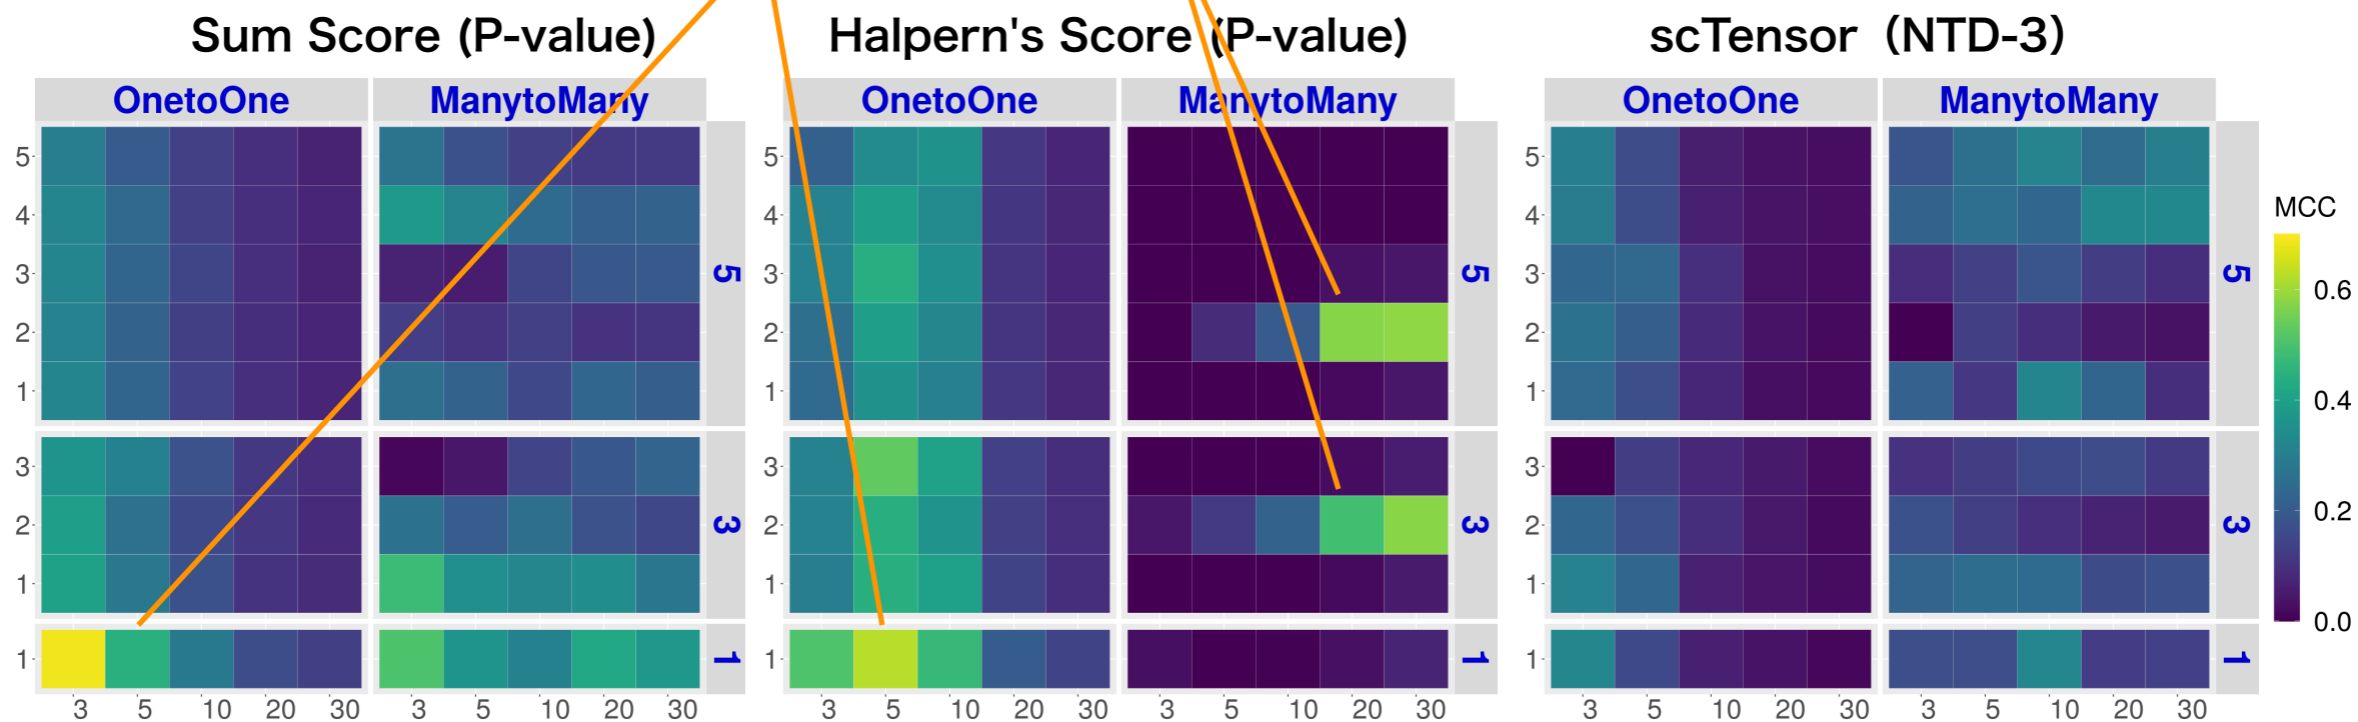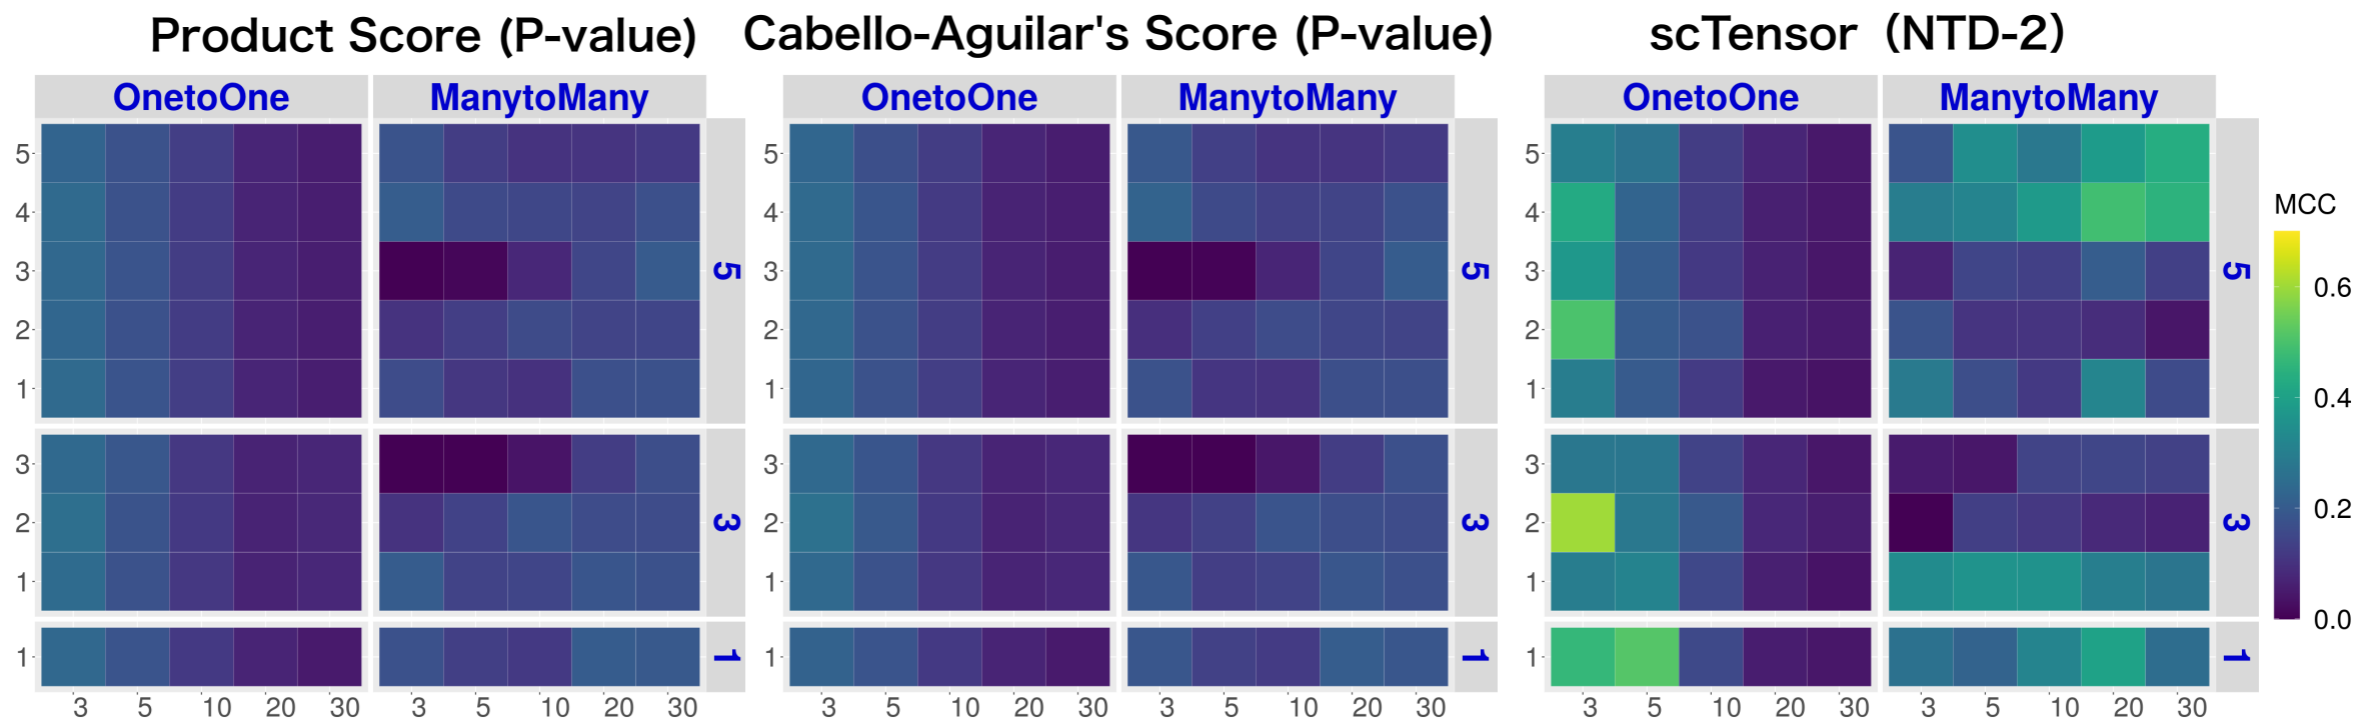

Stable in both 1 vs1  
and many vs many

# Real Datasets



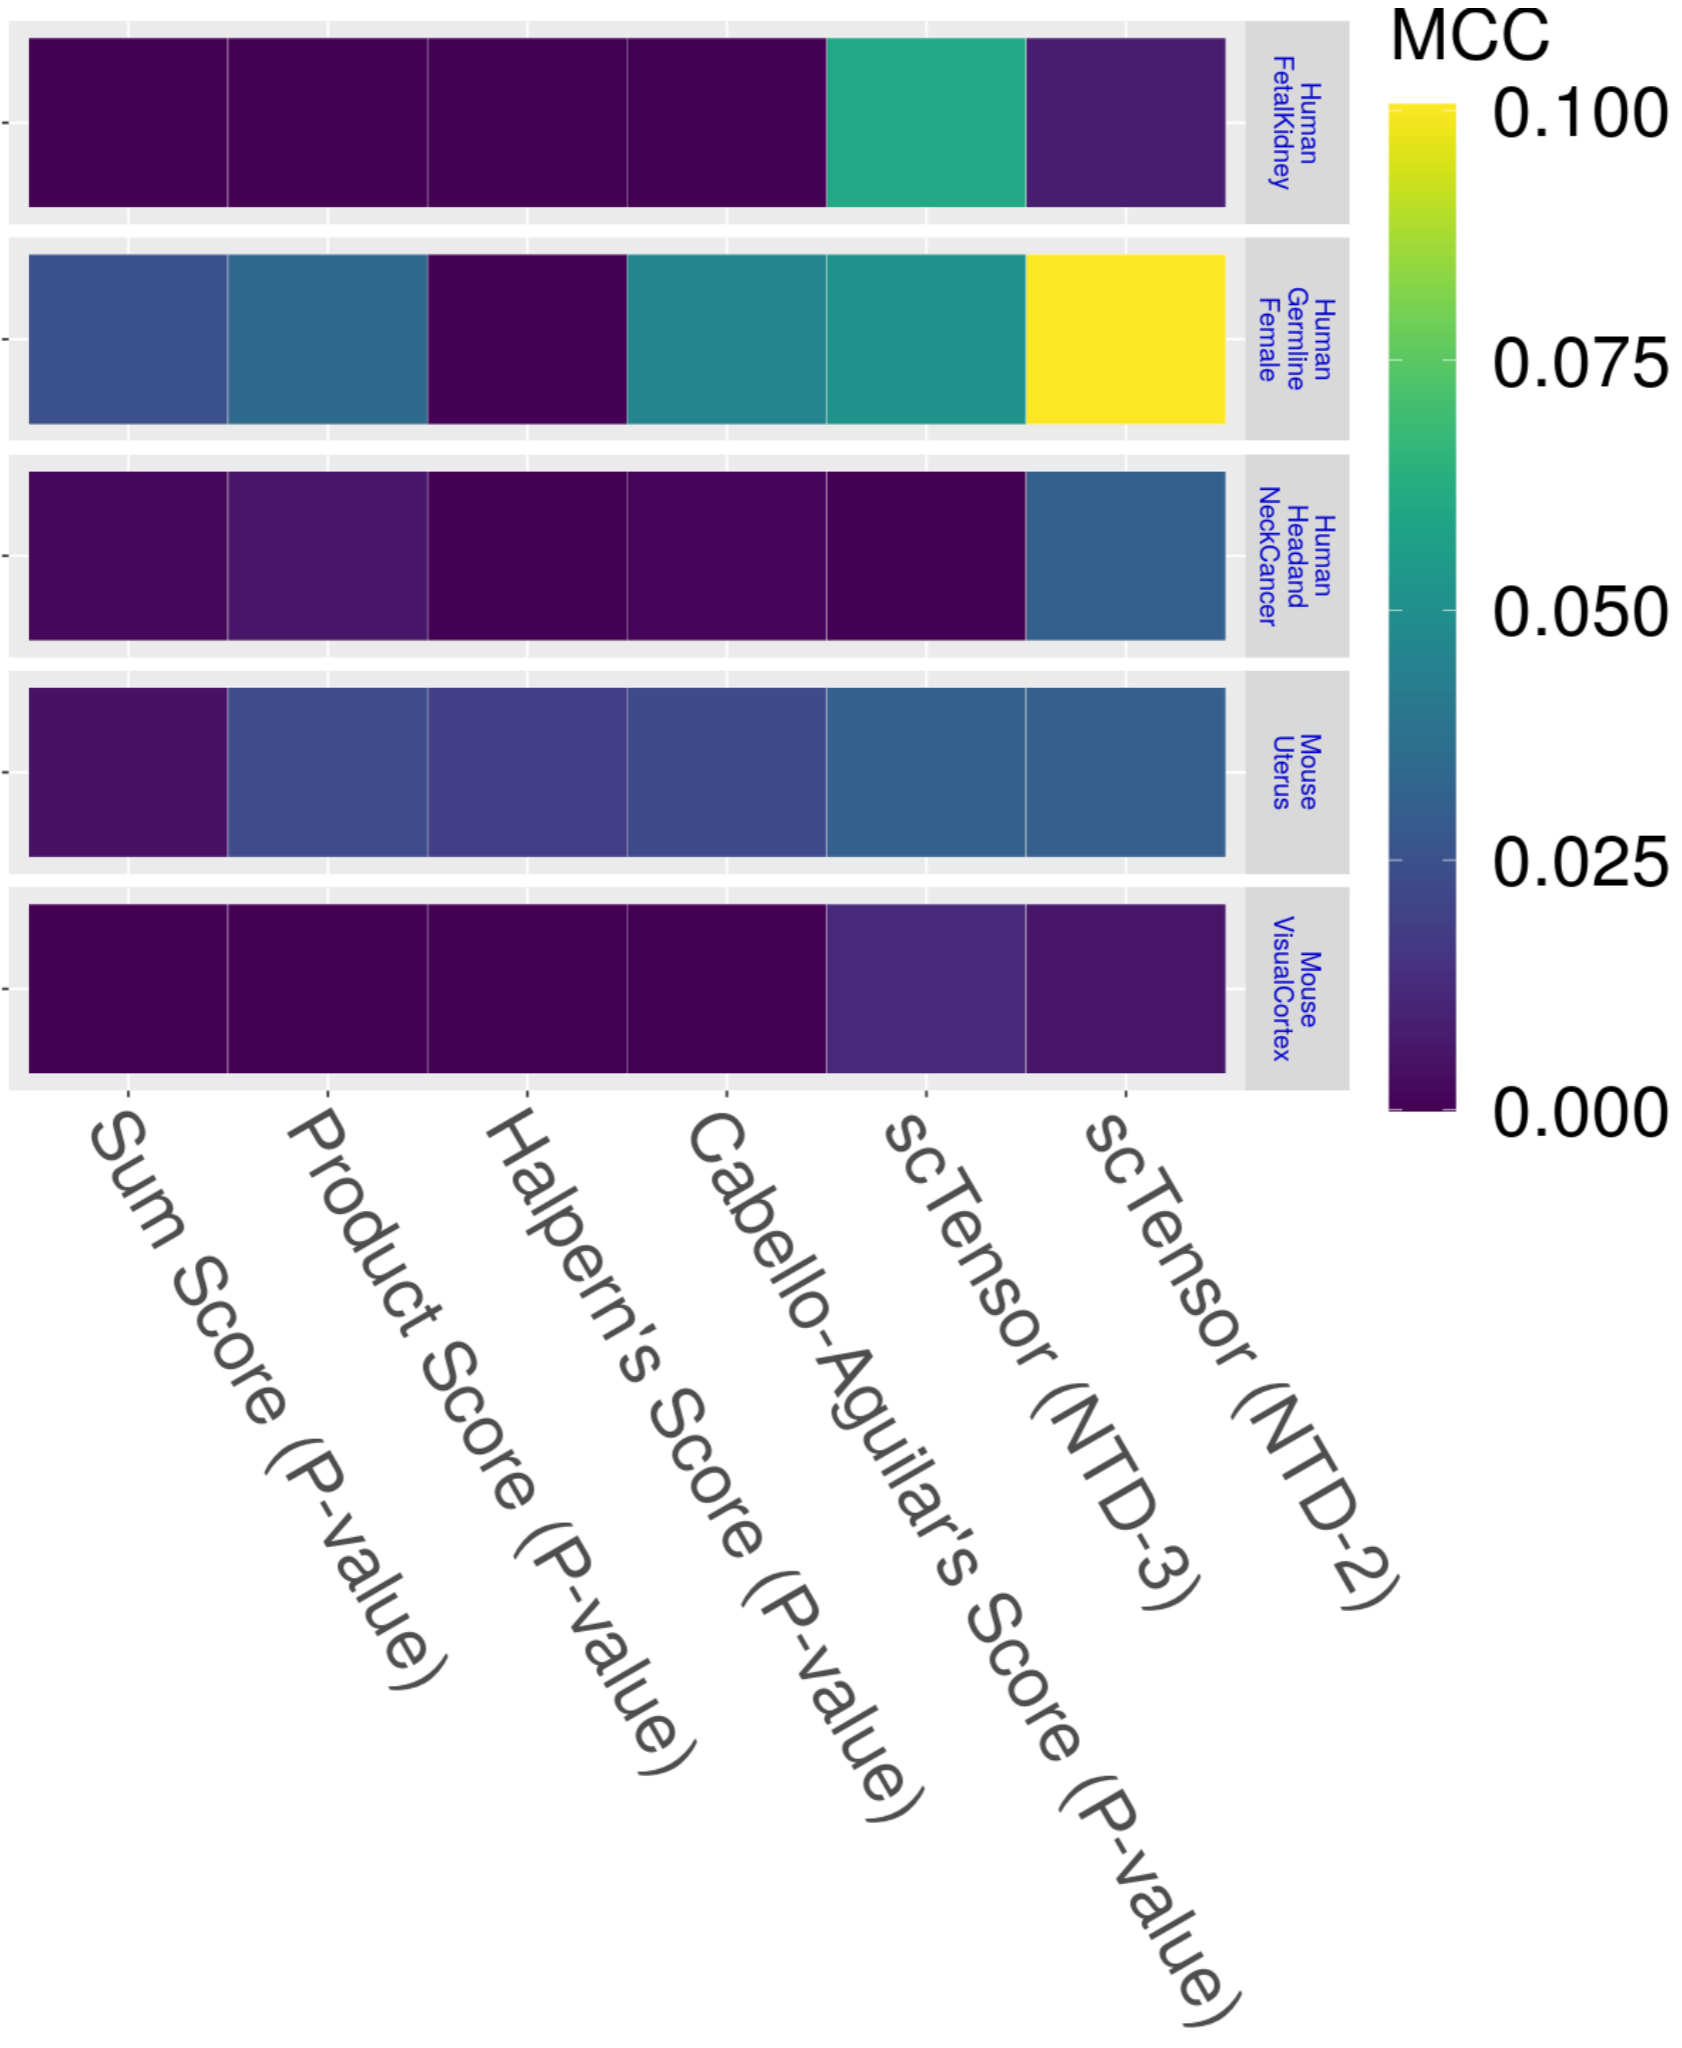

Supplement: 12859_2023_5490_MOESM8_ESM.pdf [file 12859_2023_5490_MOESM8_ESM.pdf]
