# Supplementary material for: Sctensor detects many-to-many cell–cell interactions from single cell RNA-sequencing data
Source: Springer Nature journal article supplement (doi:10.1186/s12859-023-05490-y), 2023-11-07

# Simulated Datasets

## E2 (Summary)

The value ranges 0 to 1 (the closer to 1, the worse)

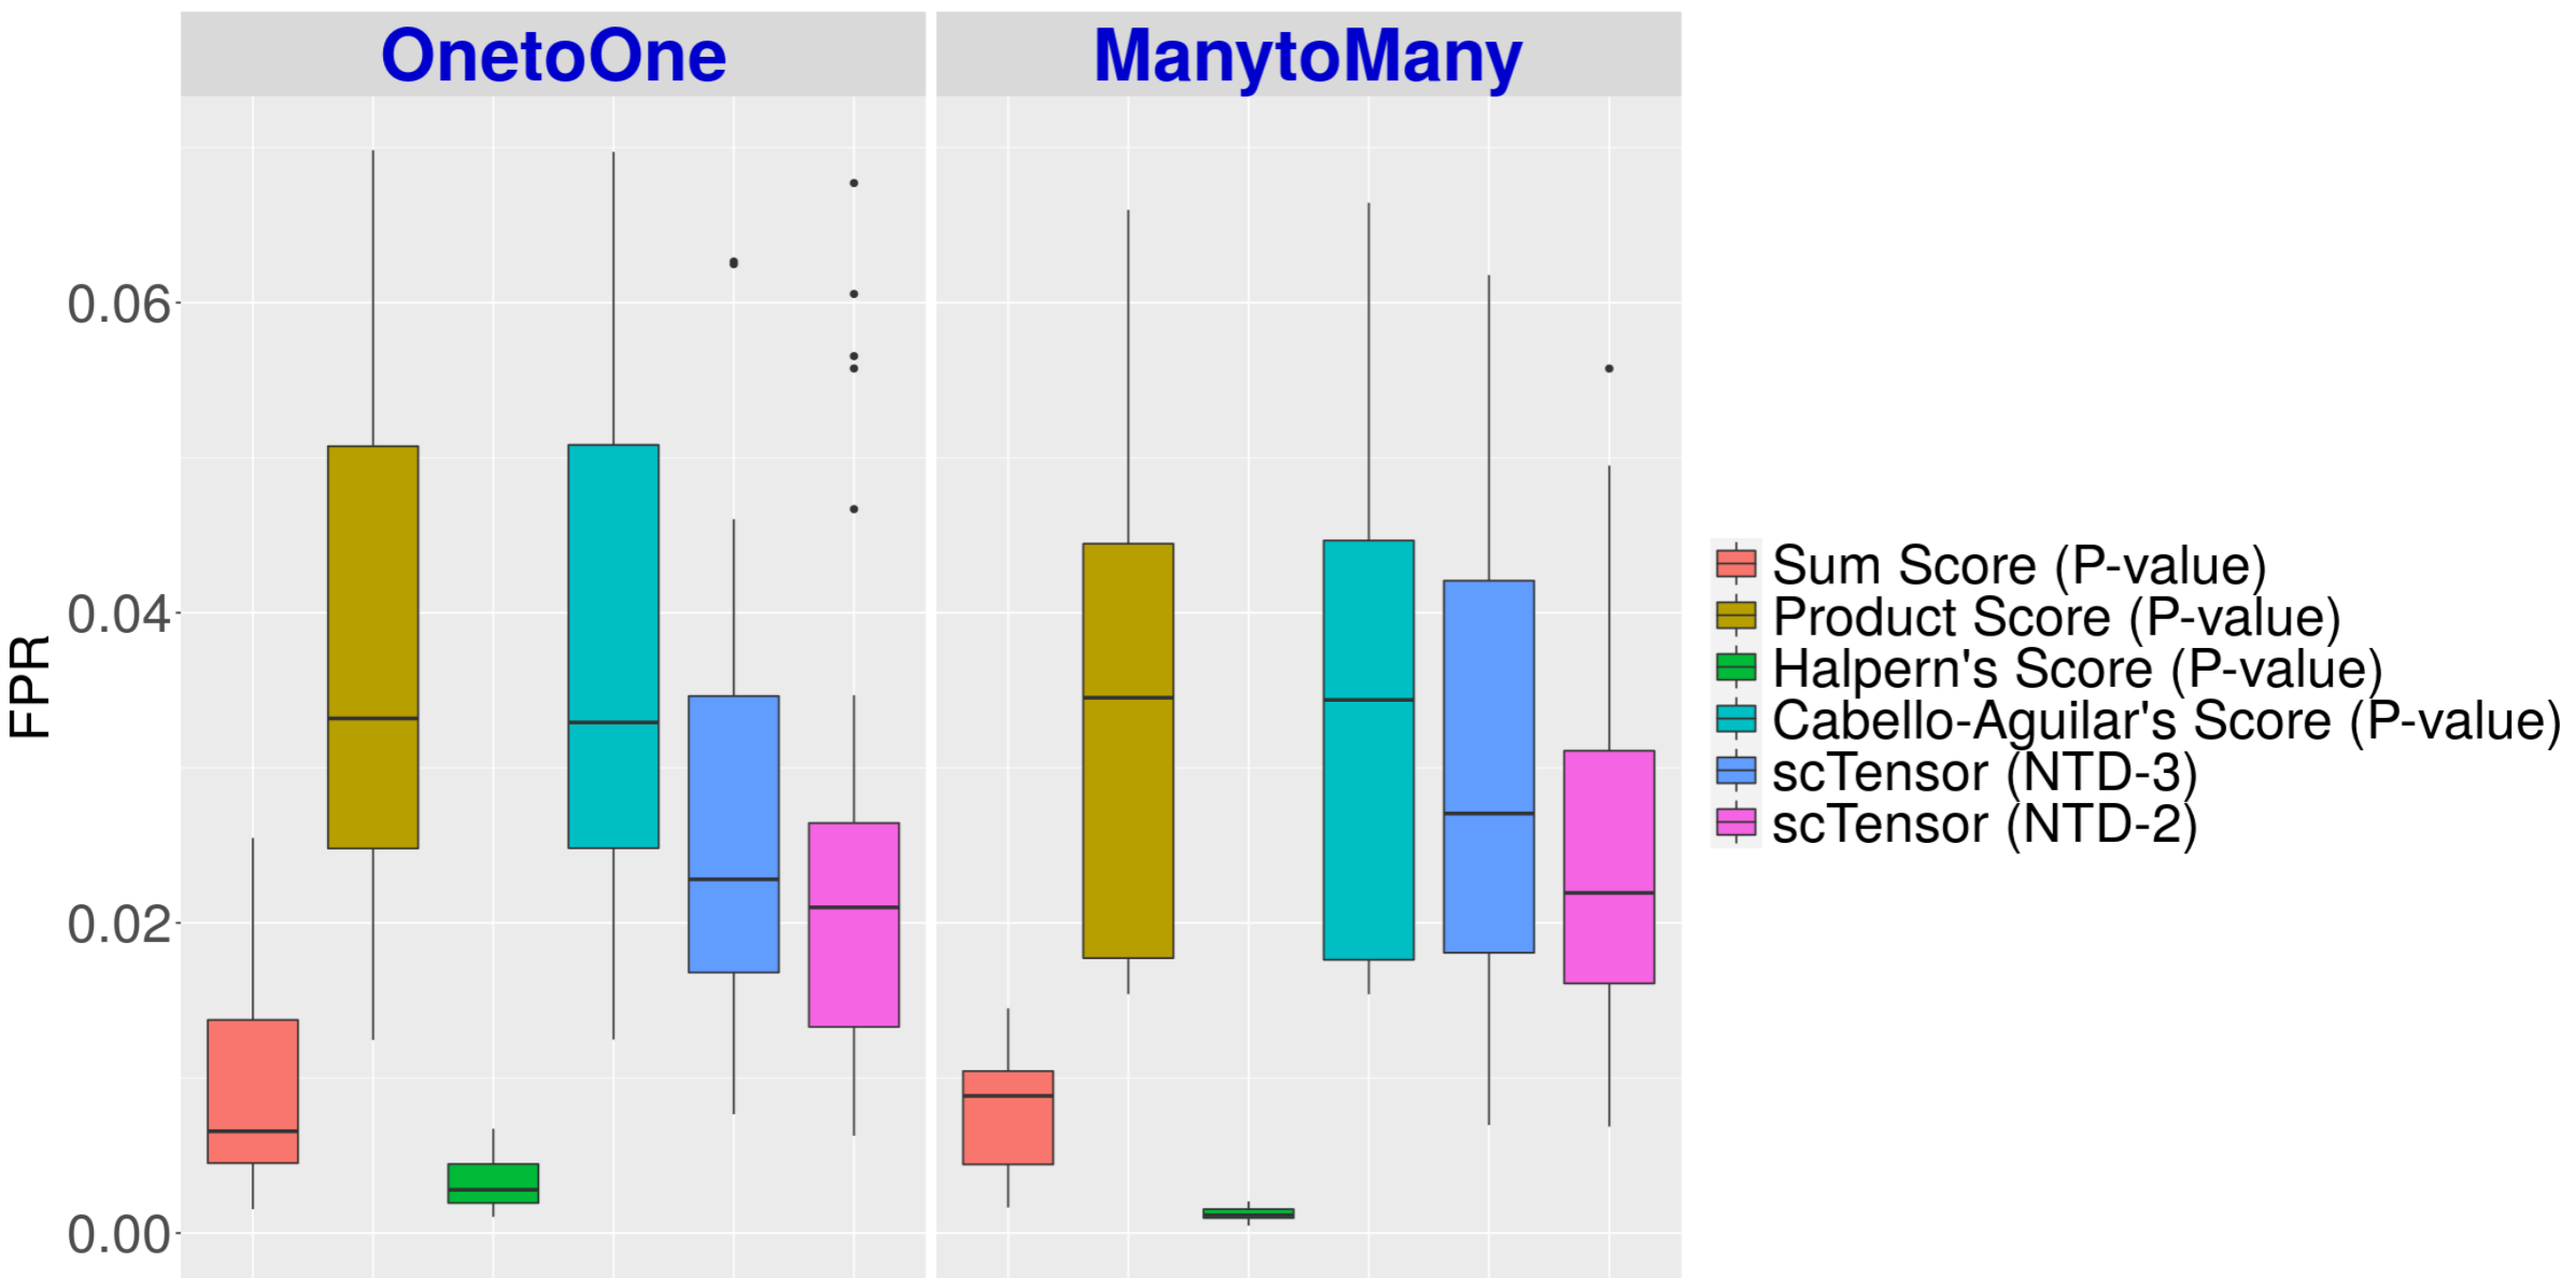

# E5 (Summary)

The value ranges 0 to 1 (the closer to 1, the worse)

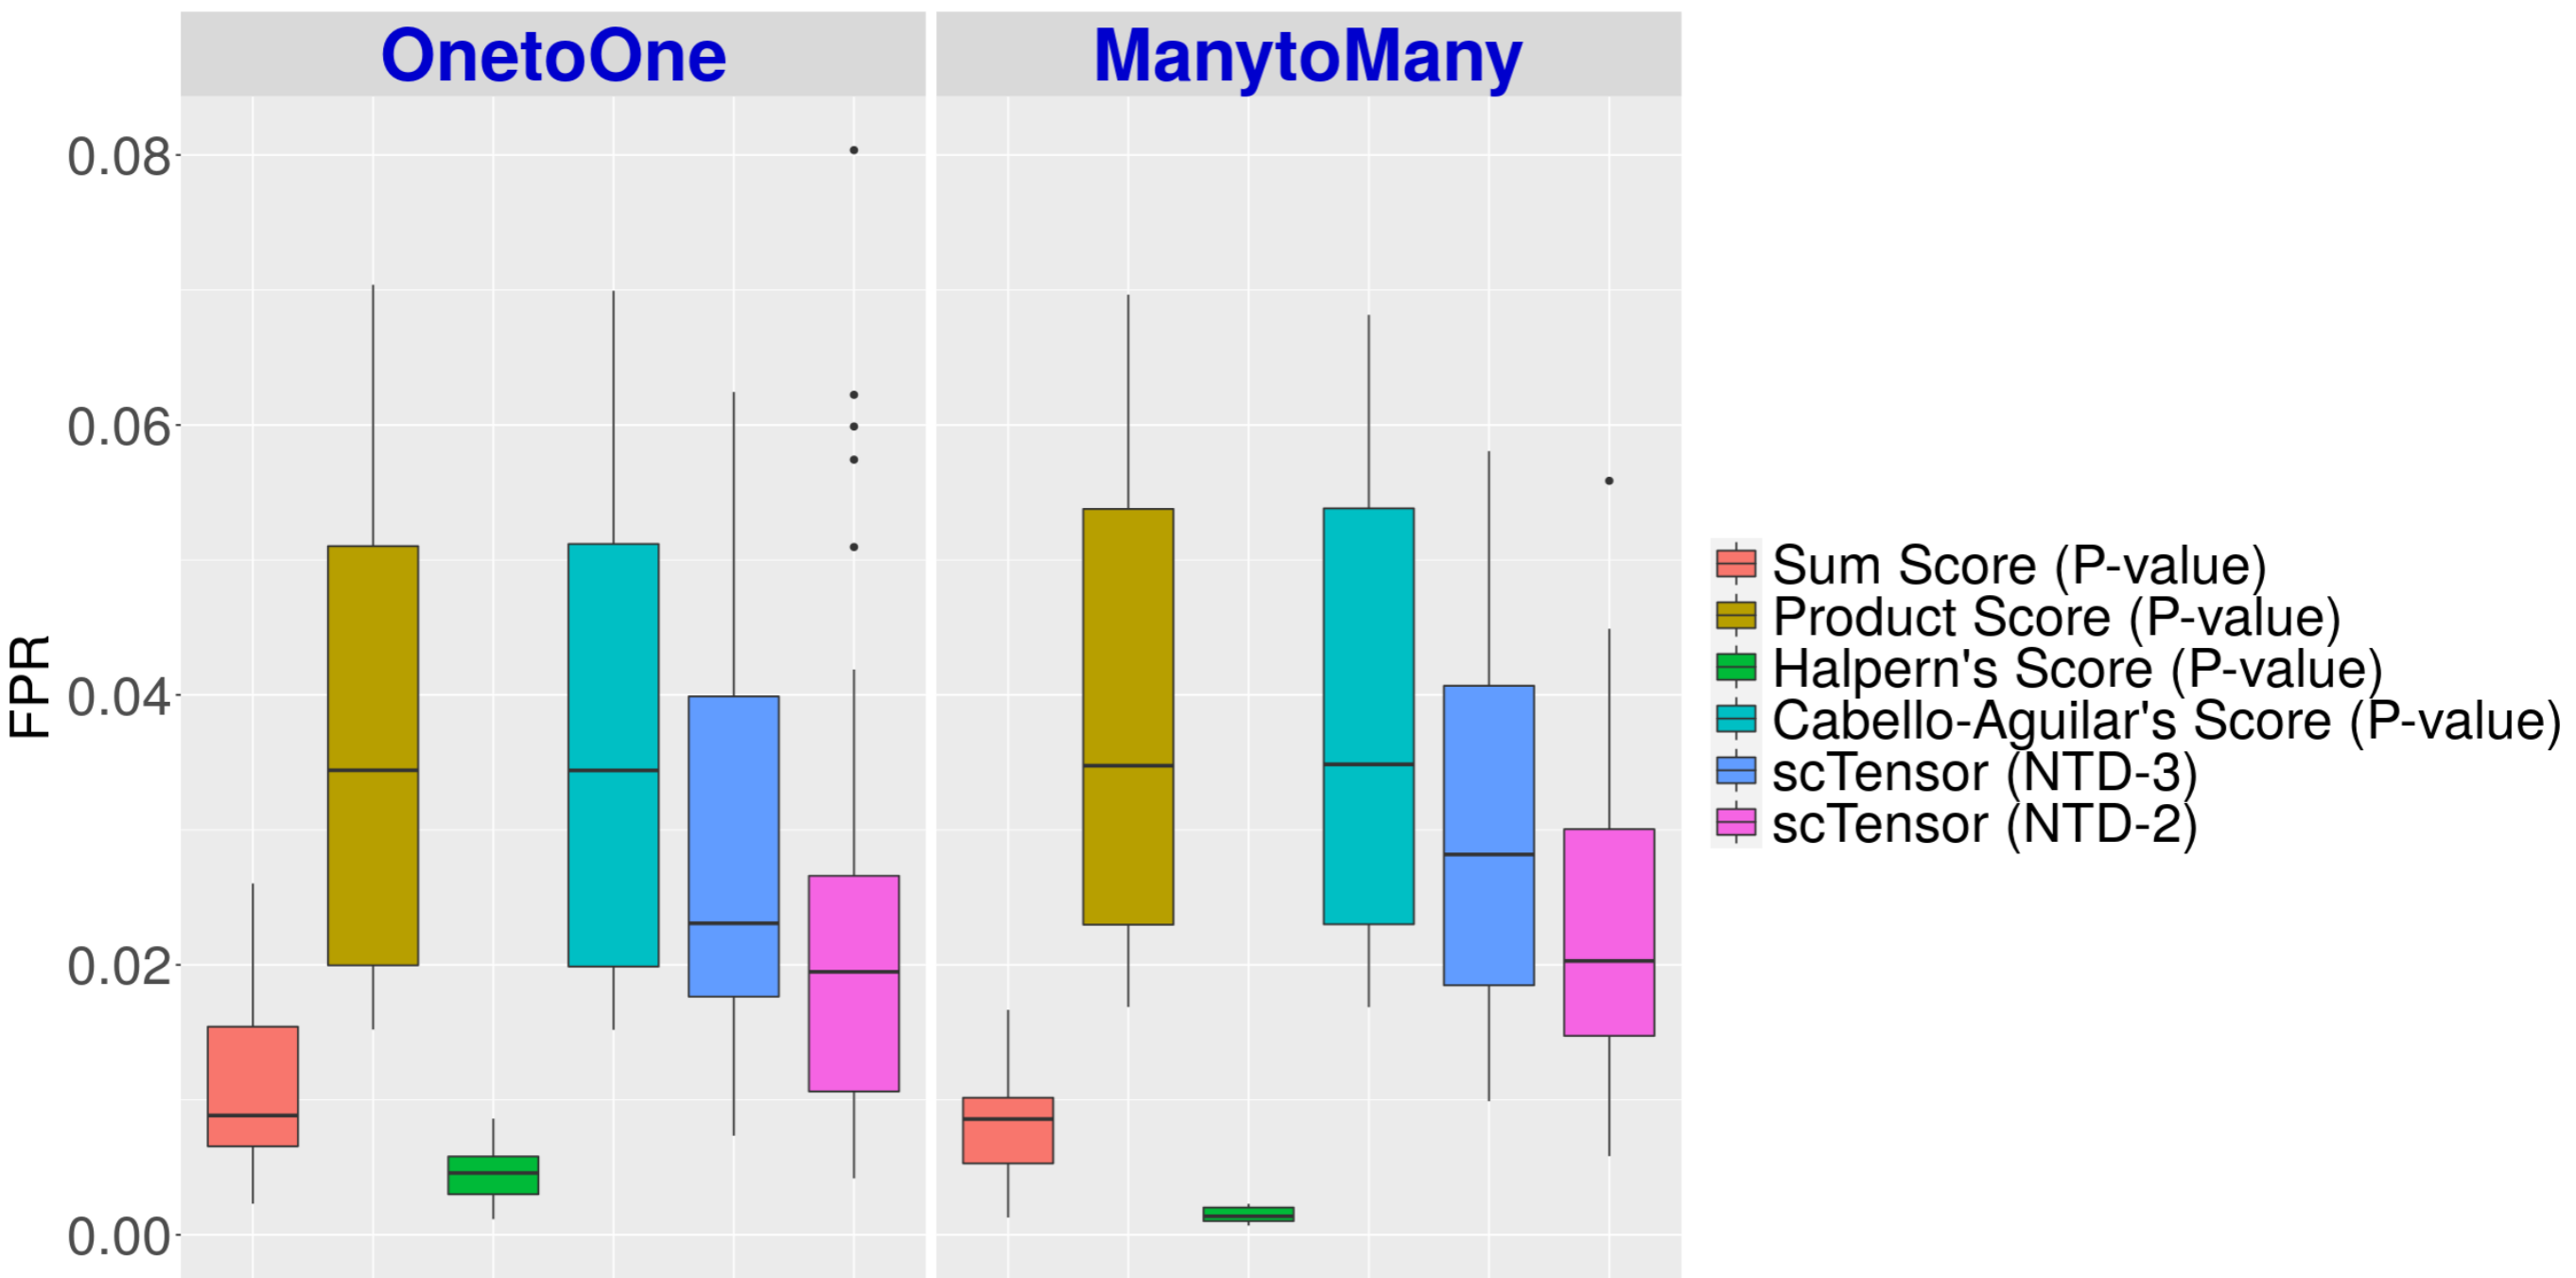

# E10 (Summary)

The value ranges 0 to 1 (the closer to 1, the worse)

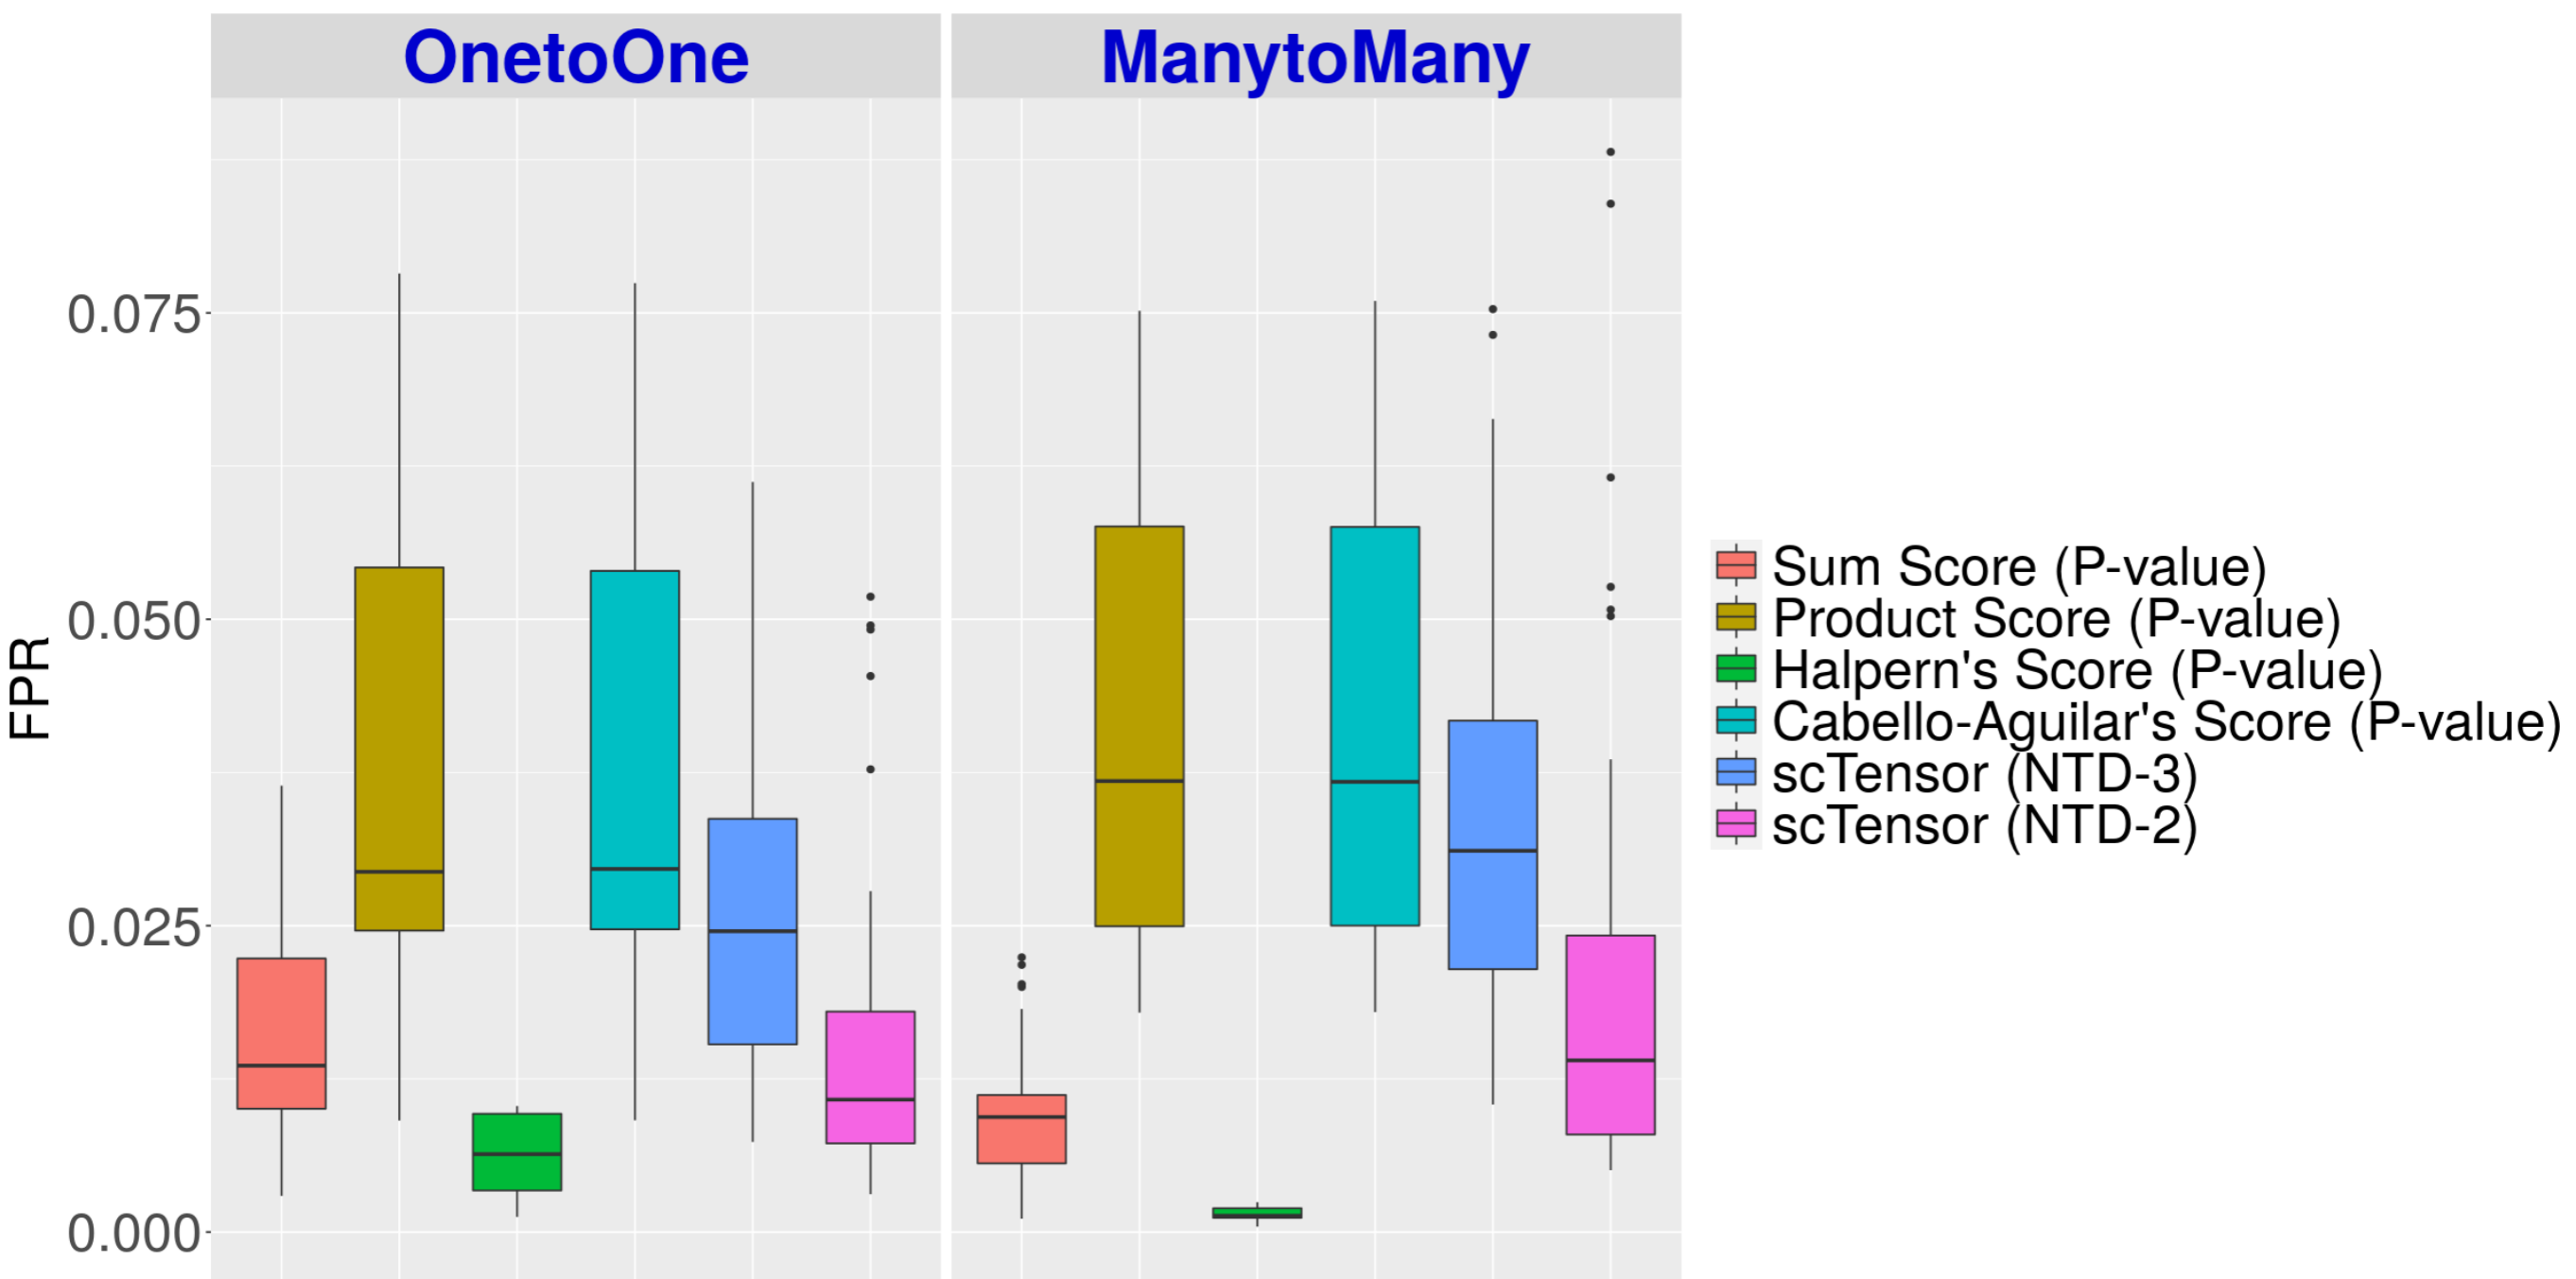

# E2 (Details)

The value ranges 0 to 1 (the closer to 1, the worse)

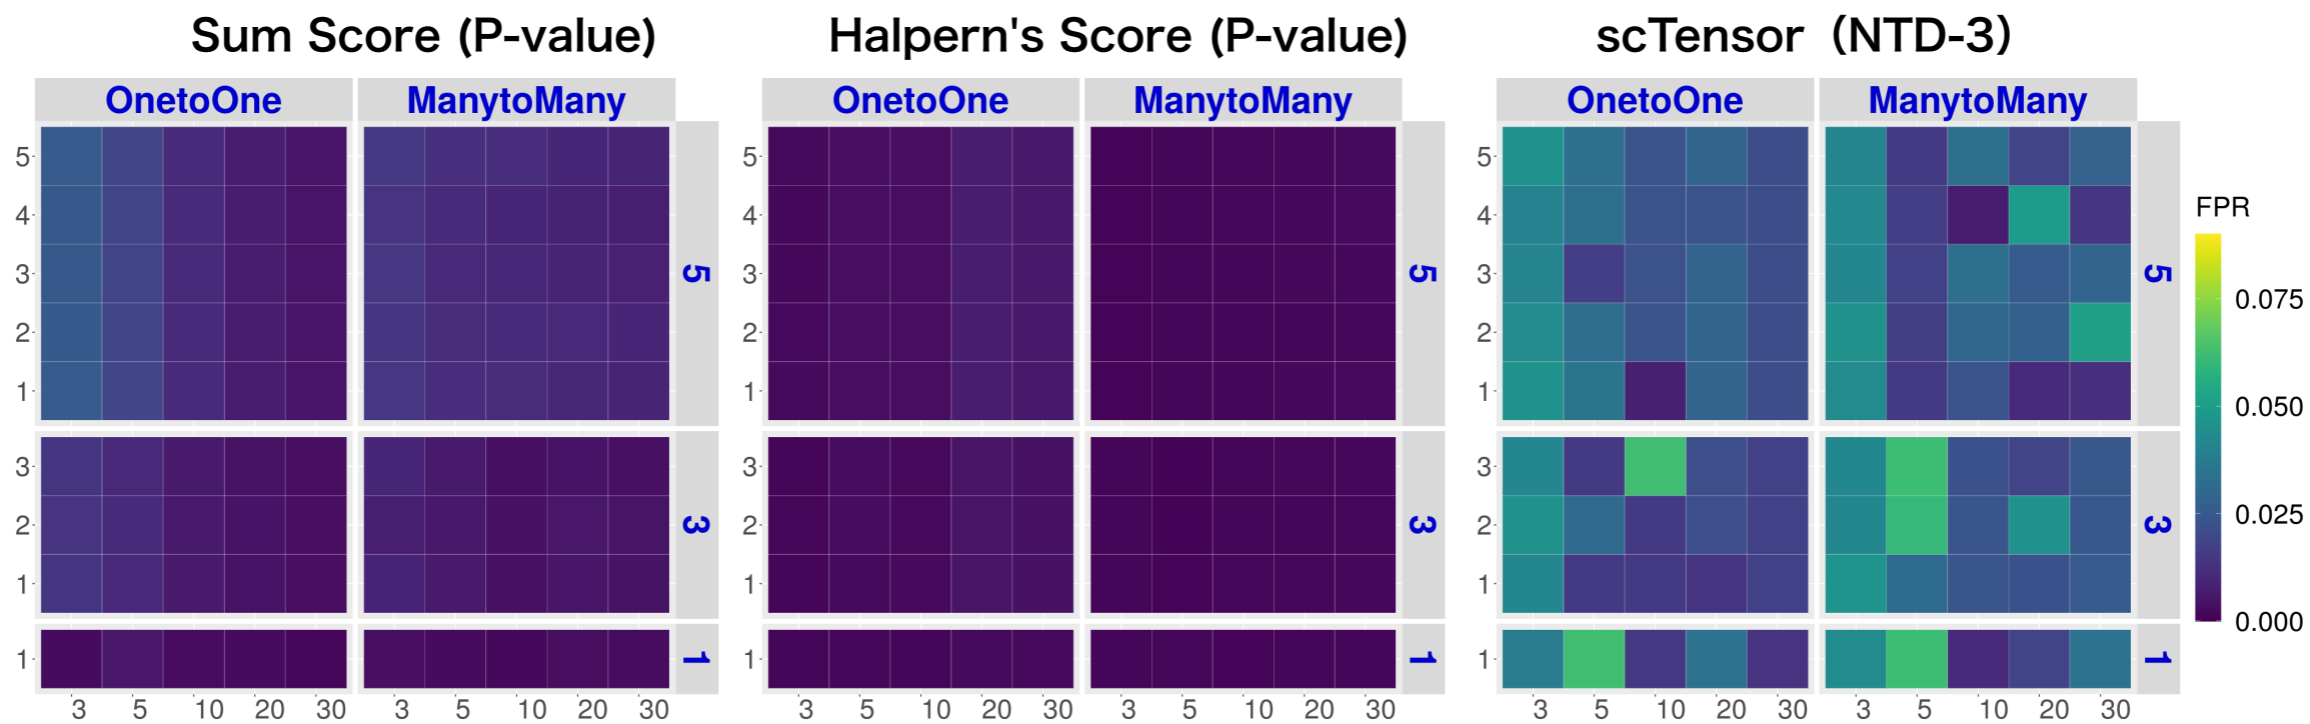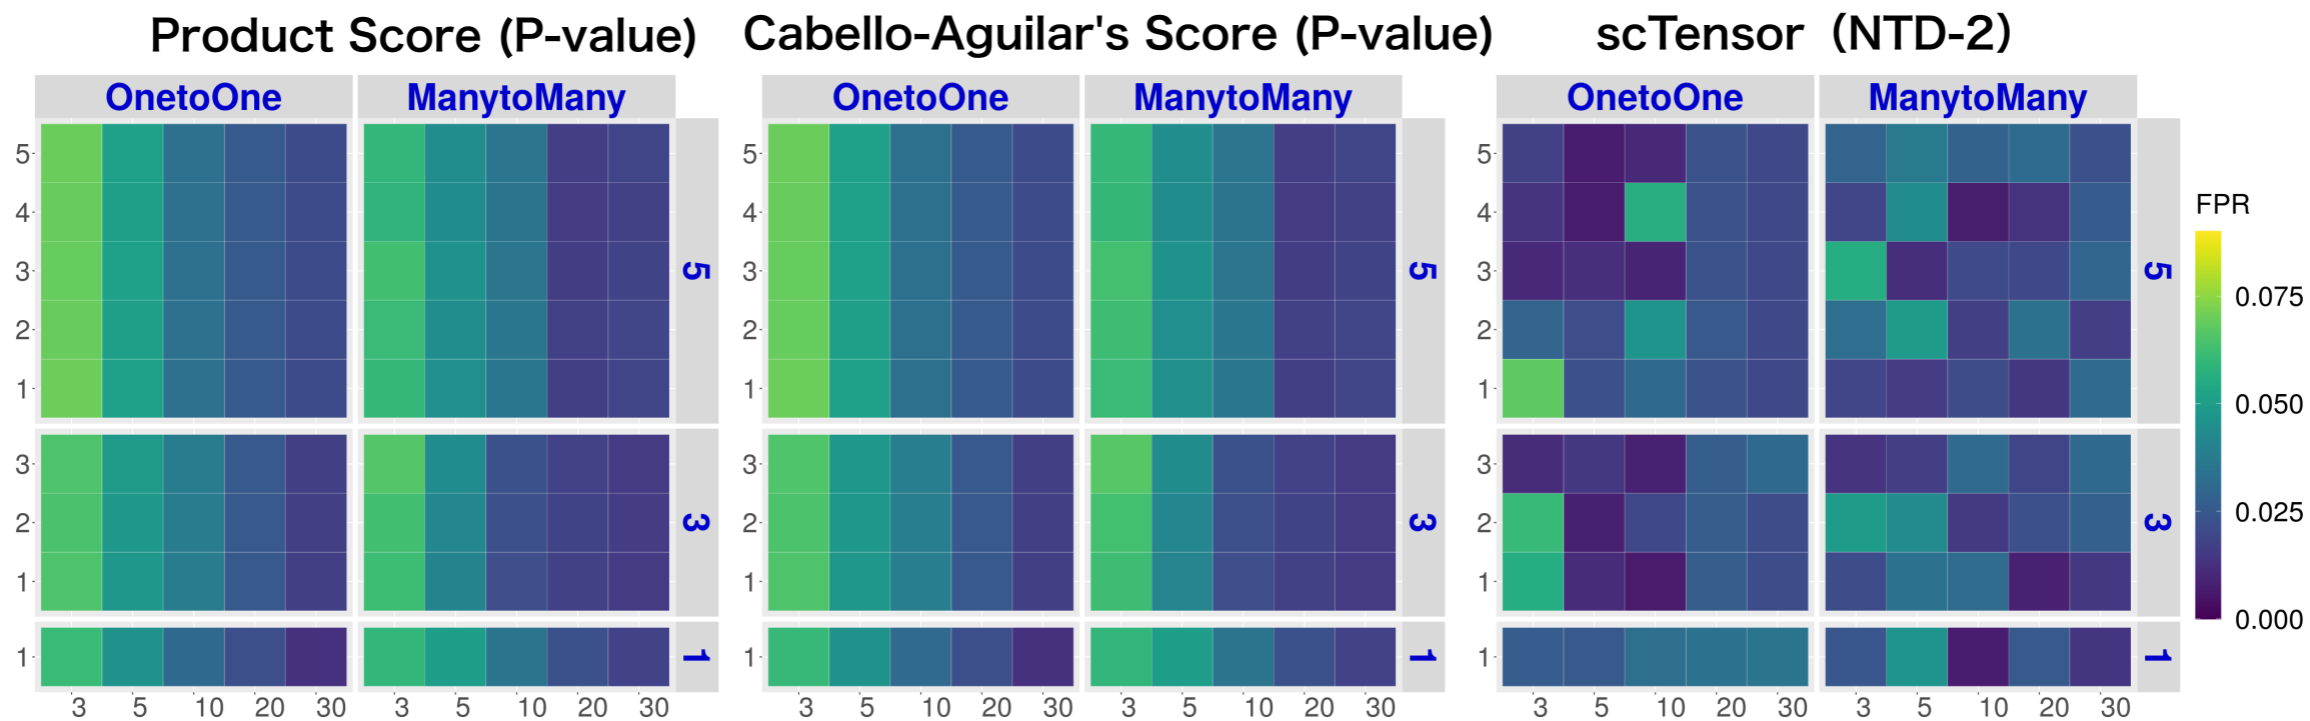

# E5 (Details)

The value ranges 0 to 1 (the closer to 1, the worse)

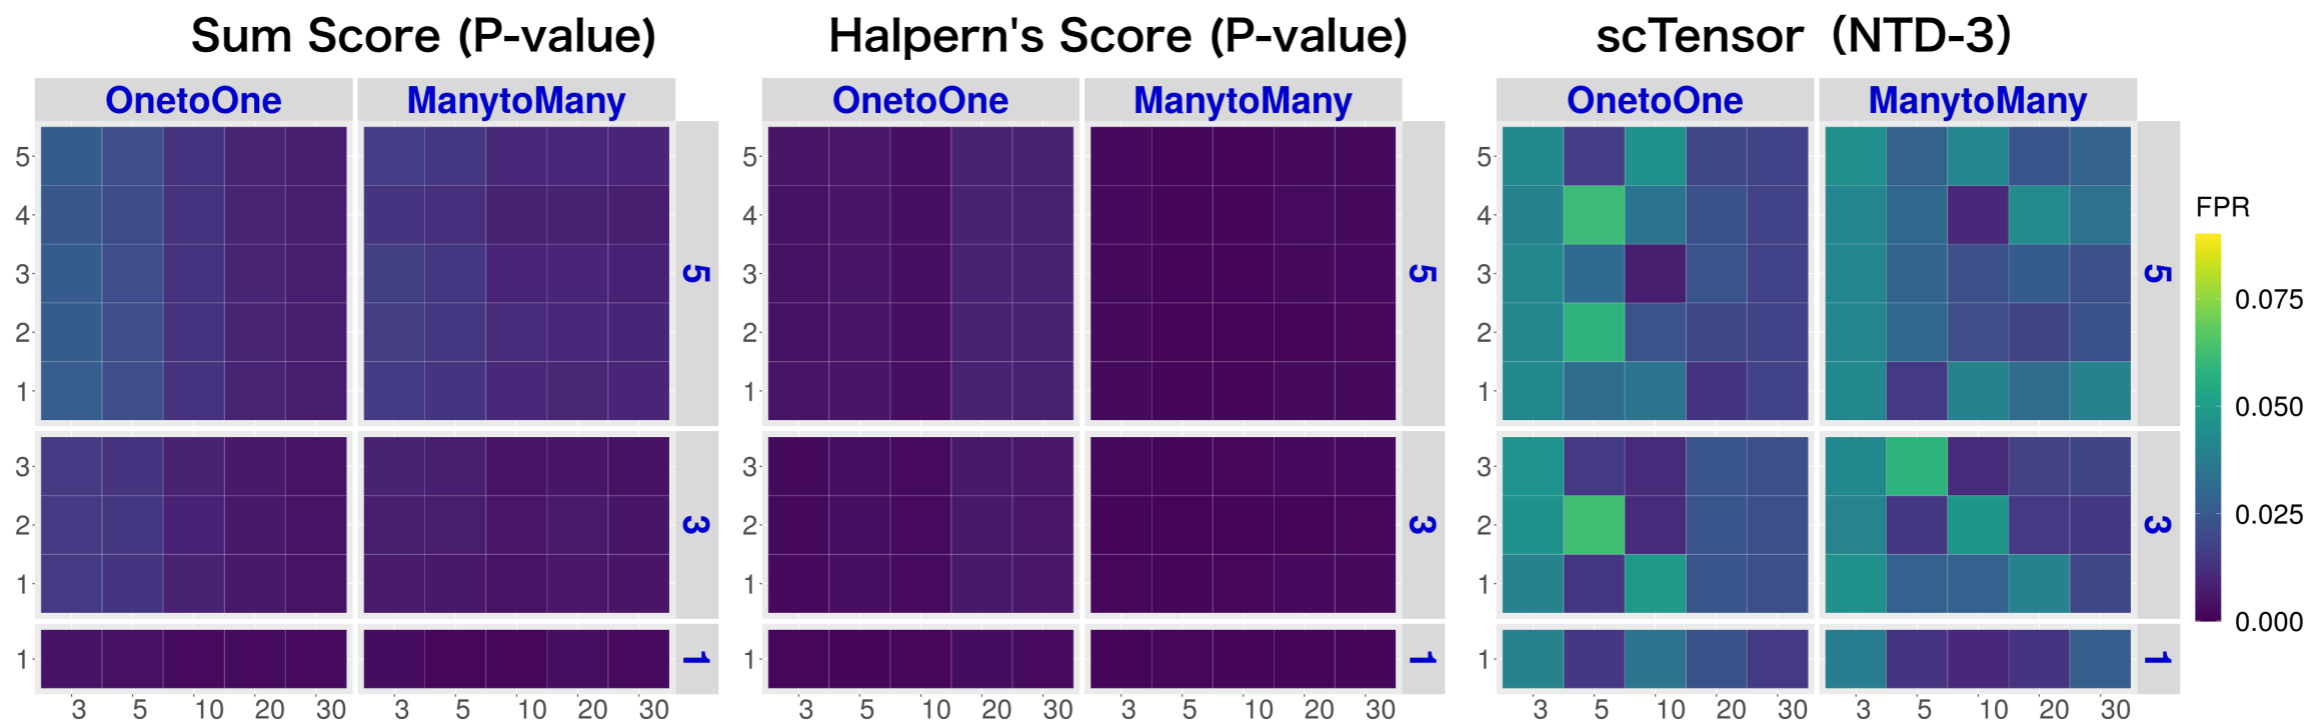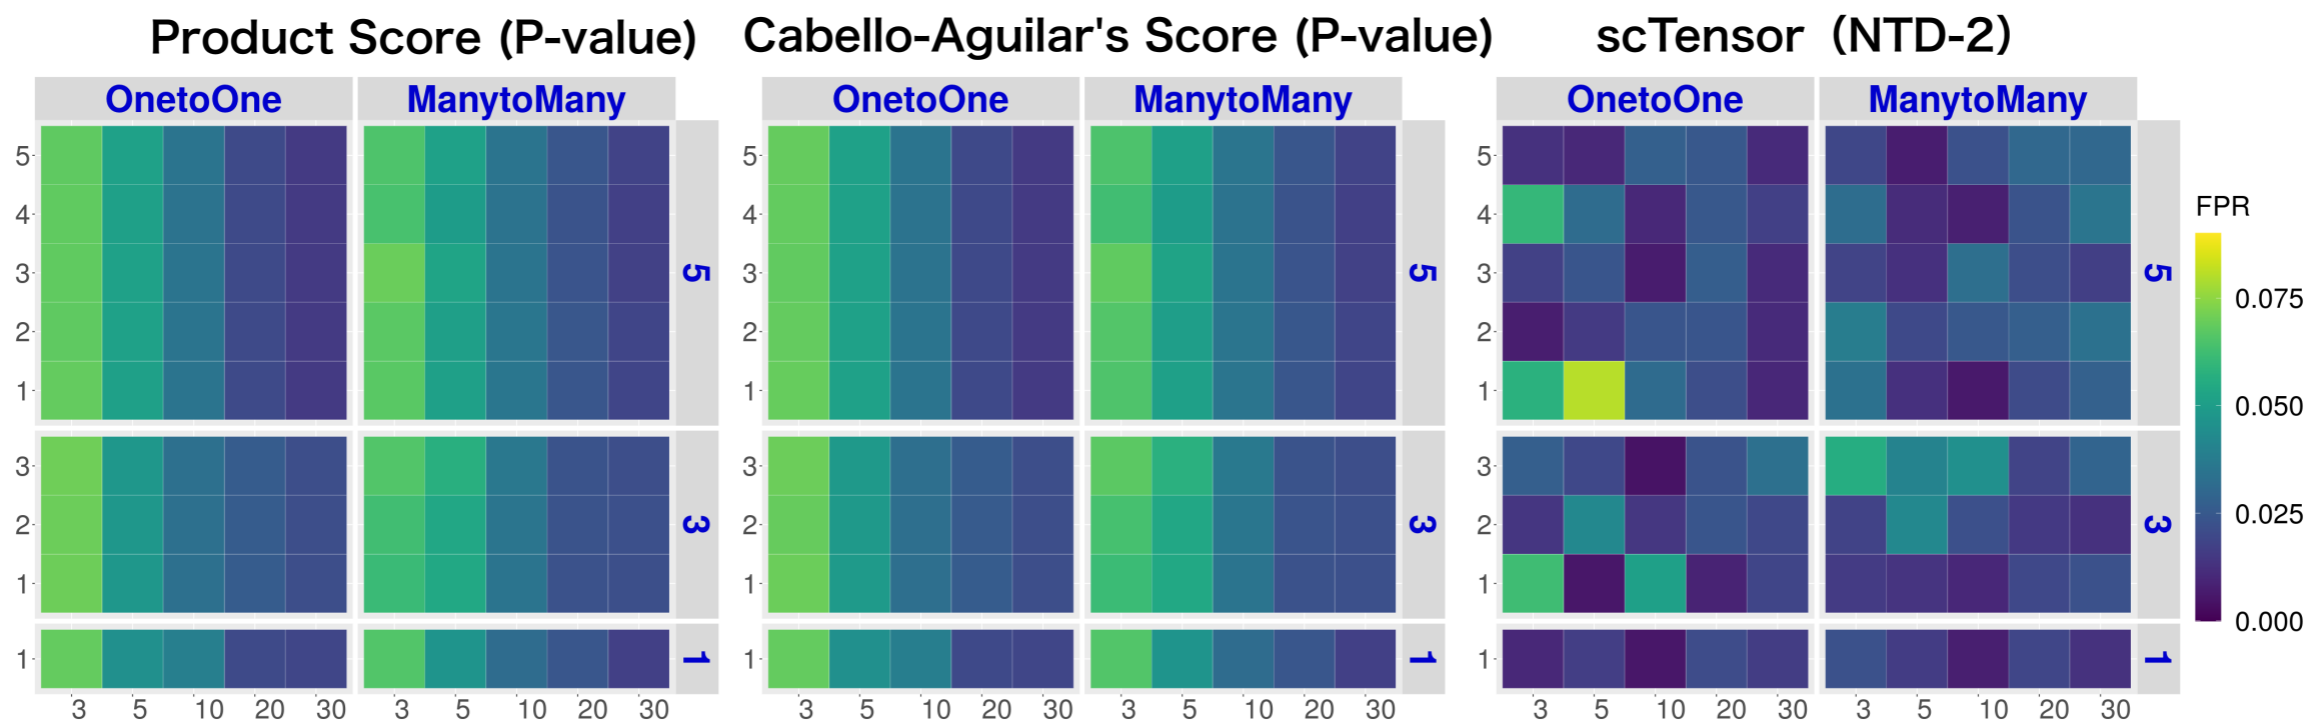

# E10 (Details)

The value ranges 0 to 1 (the closer to 1, the worse)

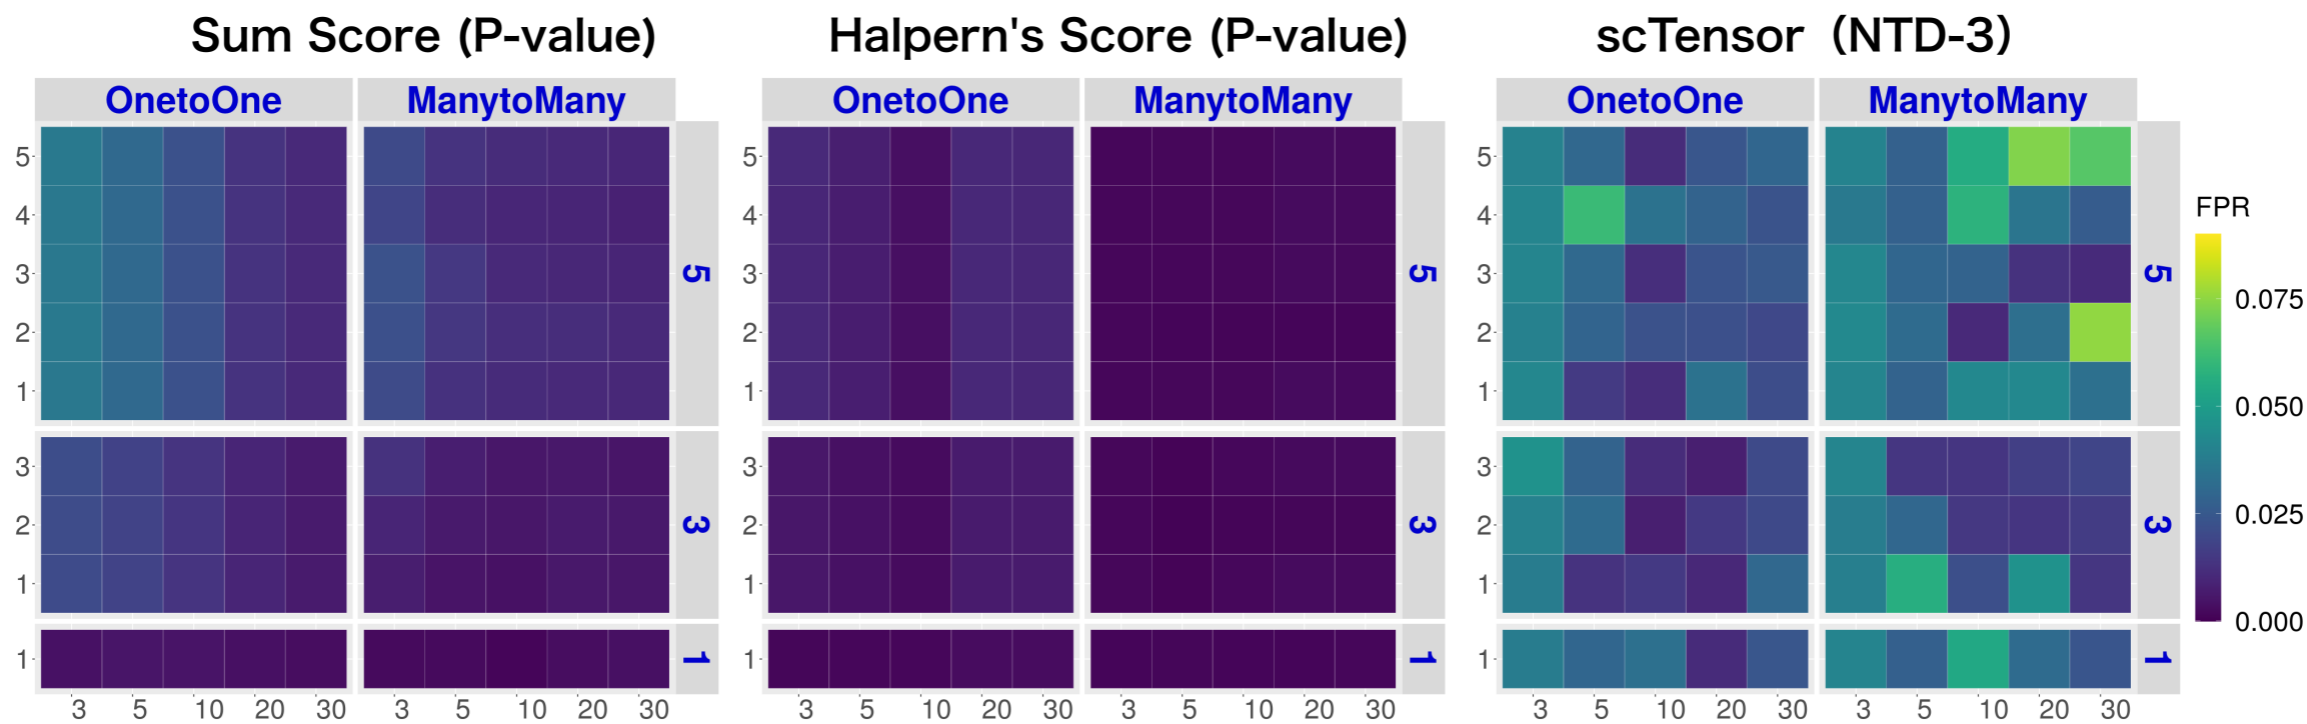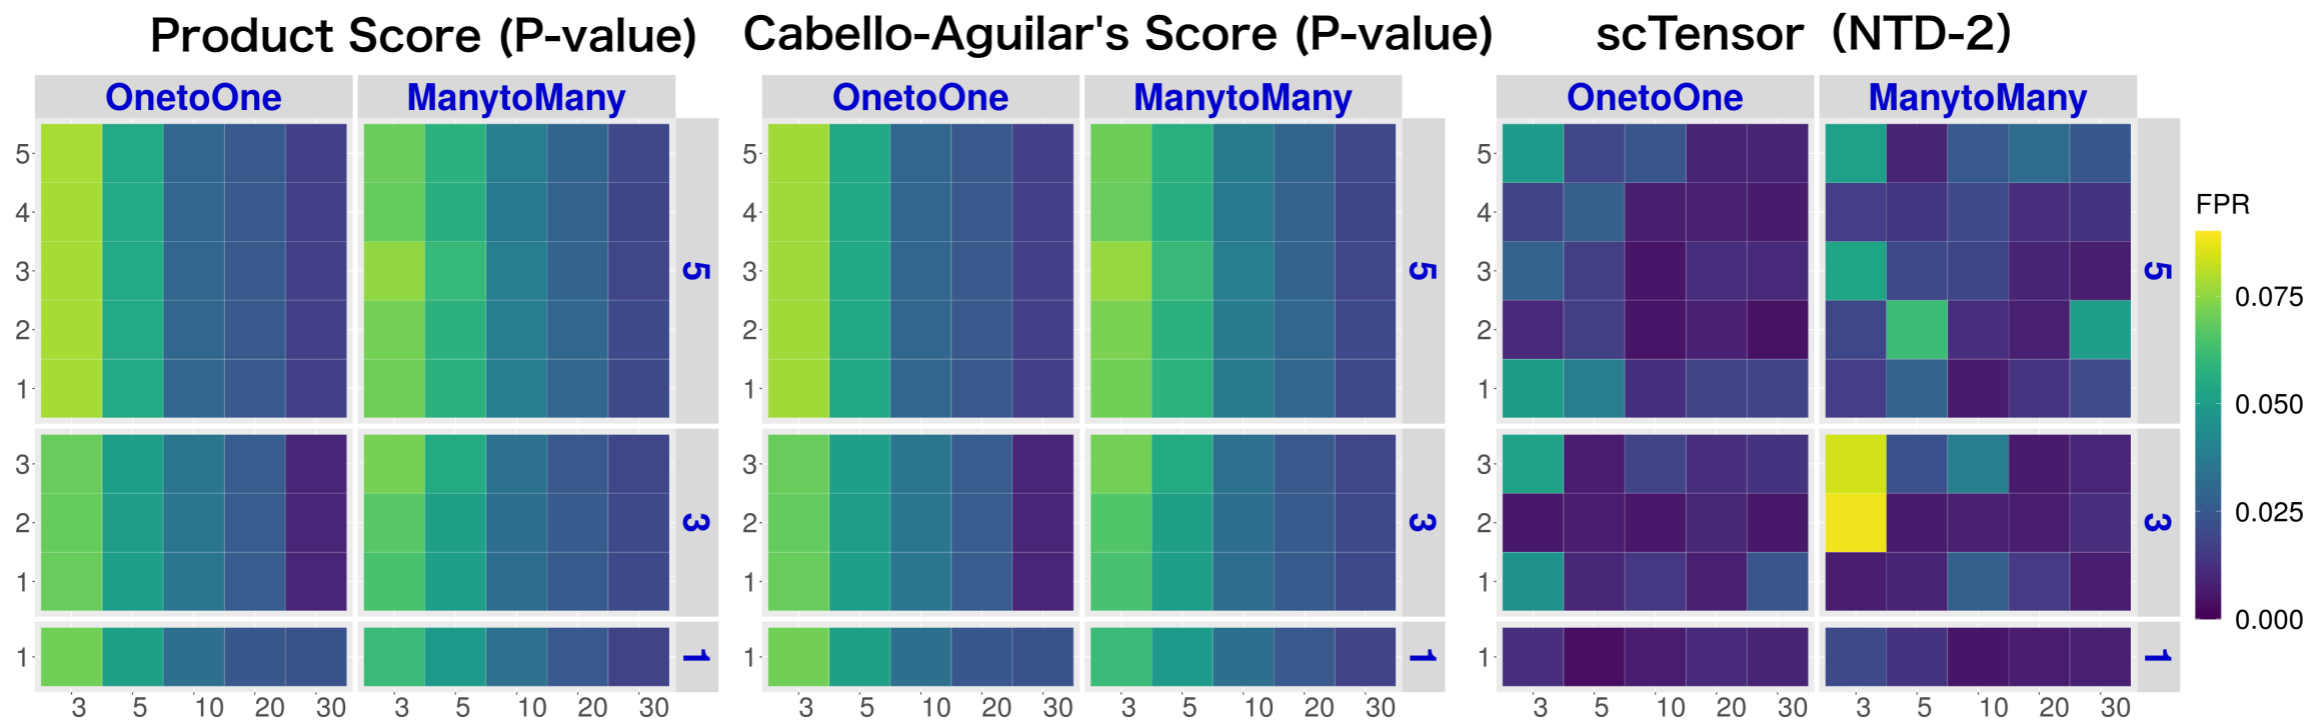

# Real Datasets



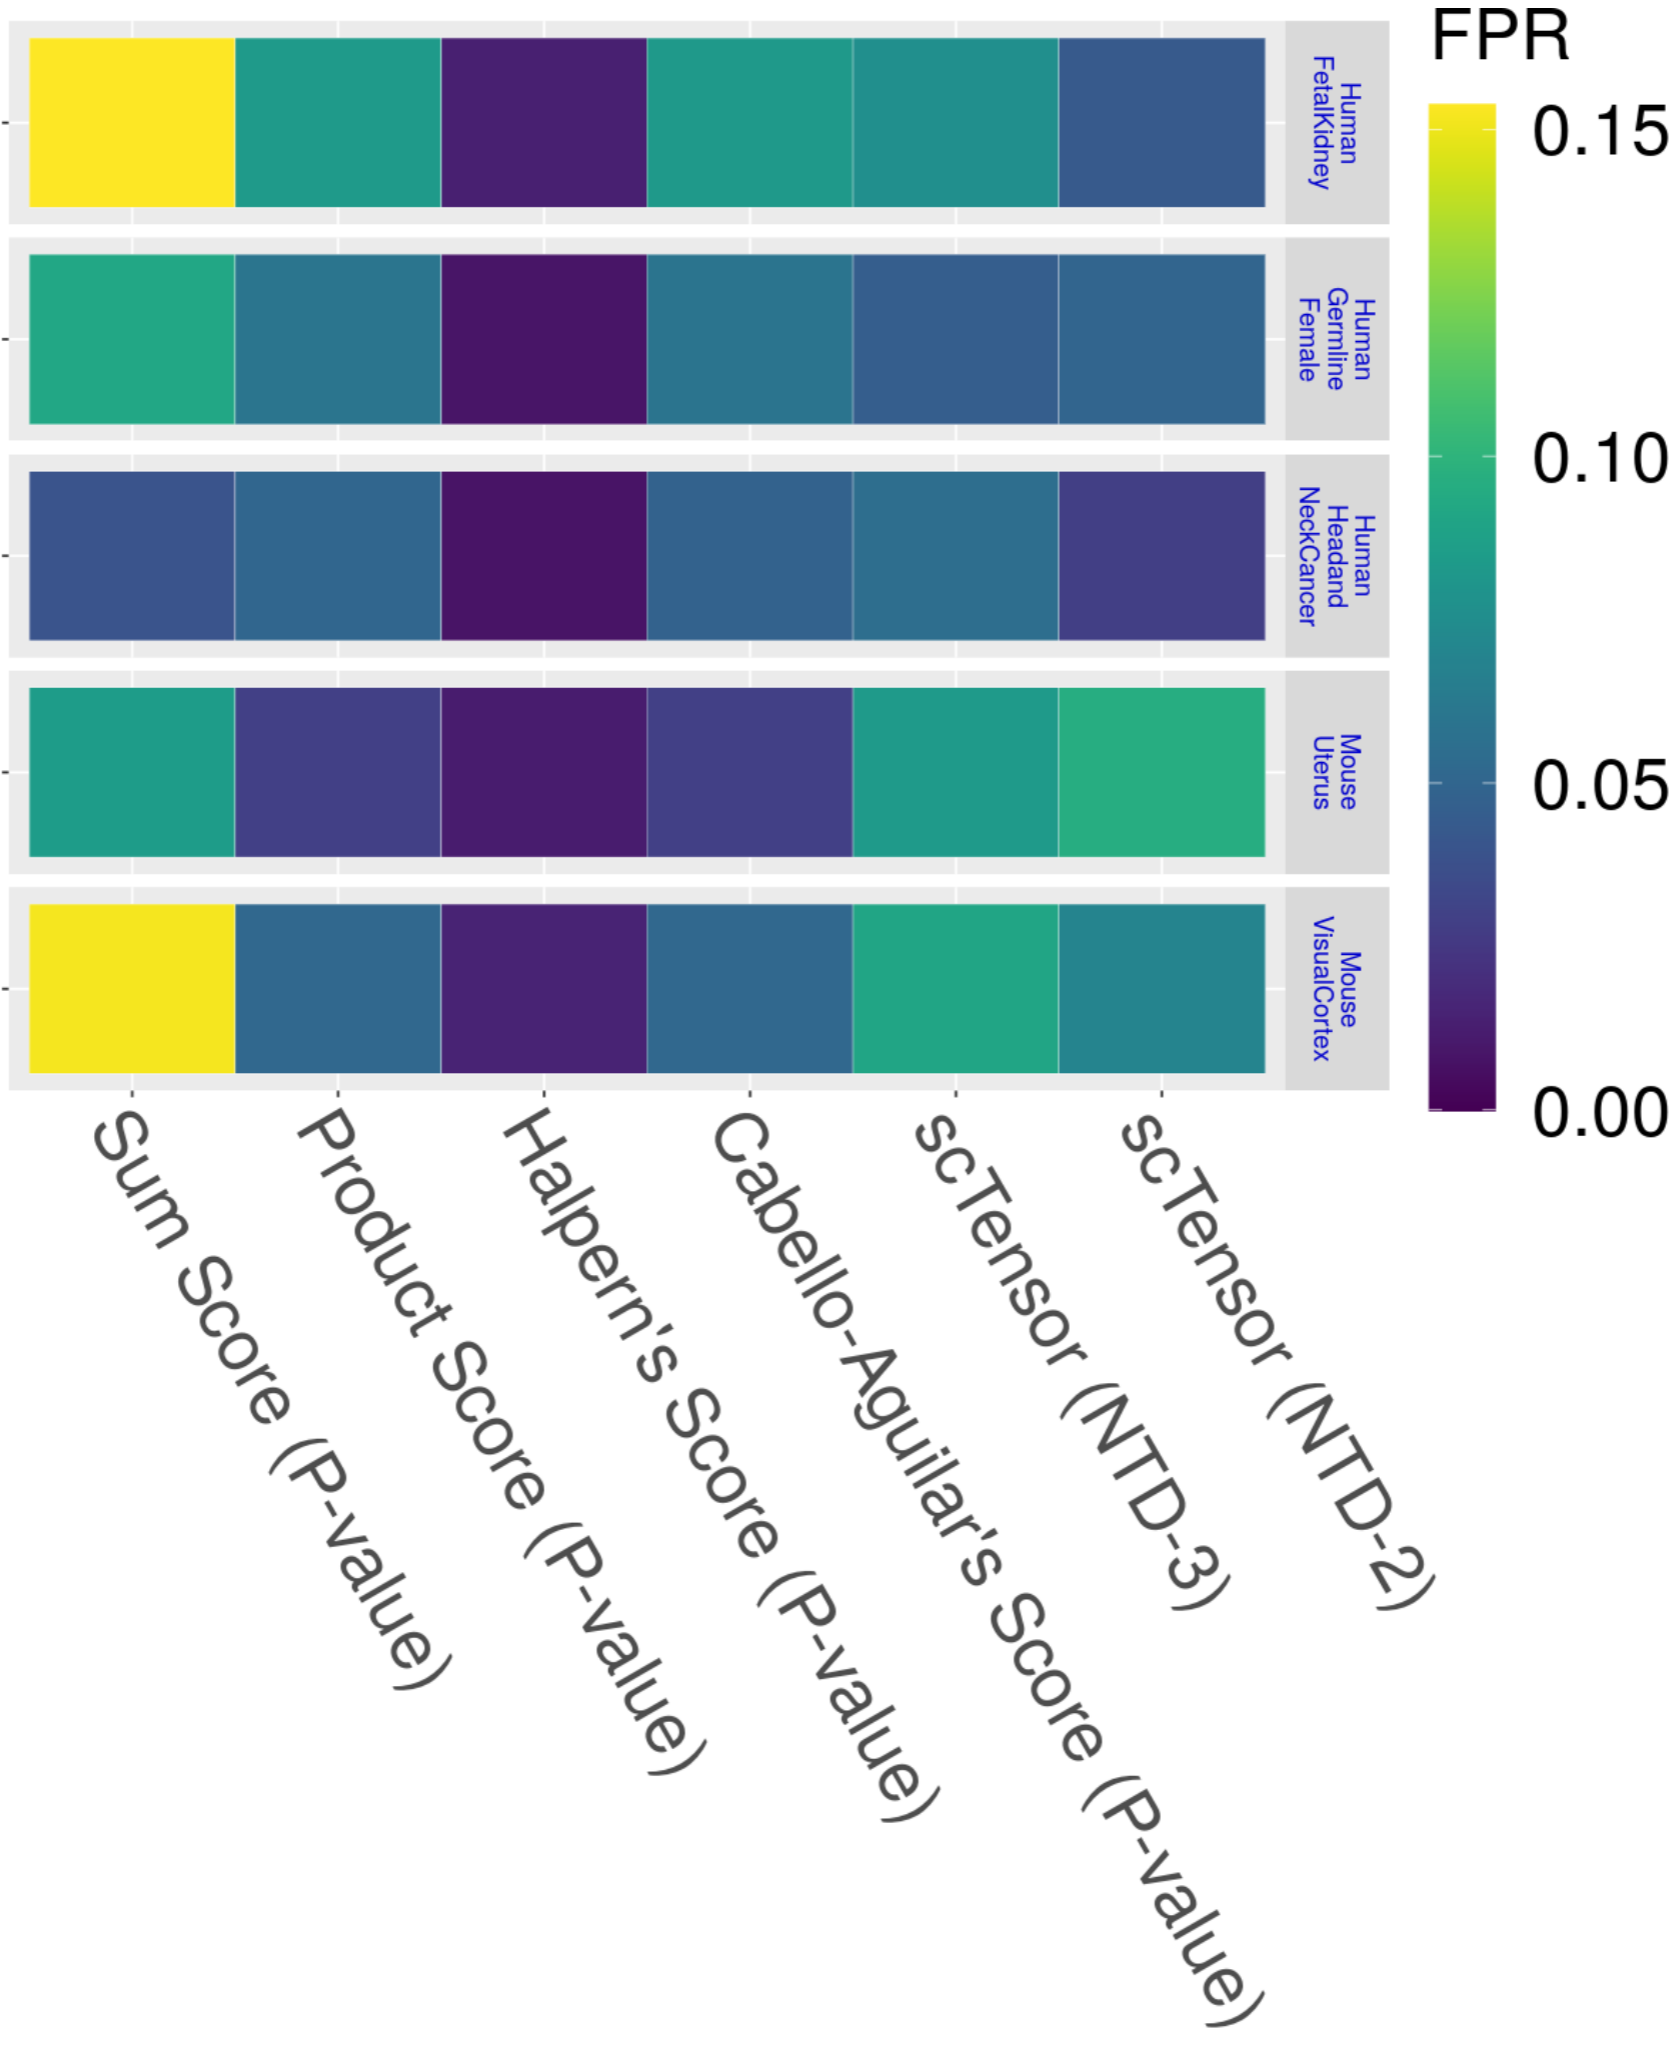

Supplement: 12859_2023_5490_MOESM10_ESM.pdf [file 12859_2023_5490_MOESM10_ESM.pdf]
