# Supplementary material for: Sctensor detects many-to-many cell–cell interactions from single cell RNA-sequencing data
Source: Springer Nature journal article supplement (doi:10.1186/s12859-023-05490-y), 2023-11-07

# Simulated Datasets

# Summary

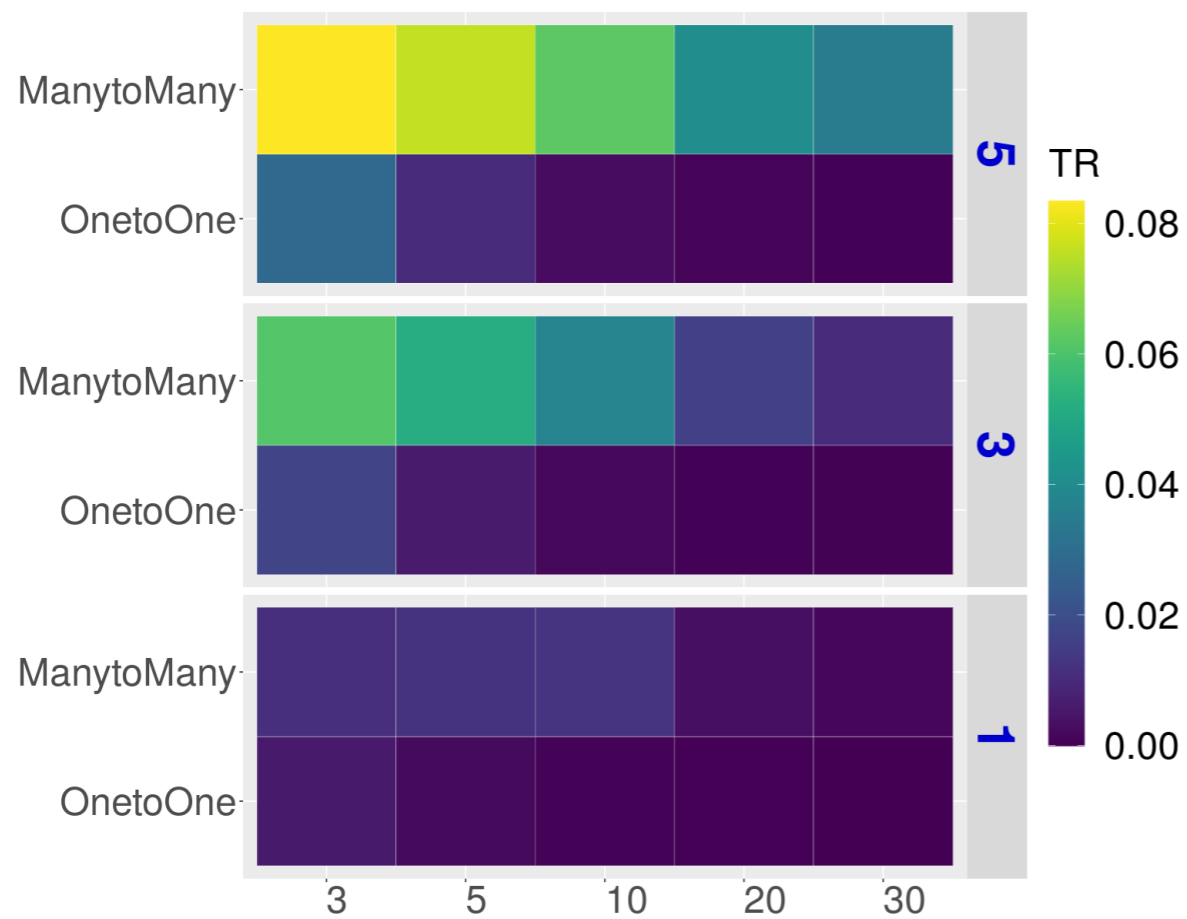

# Details

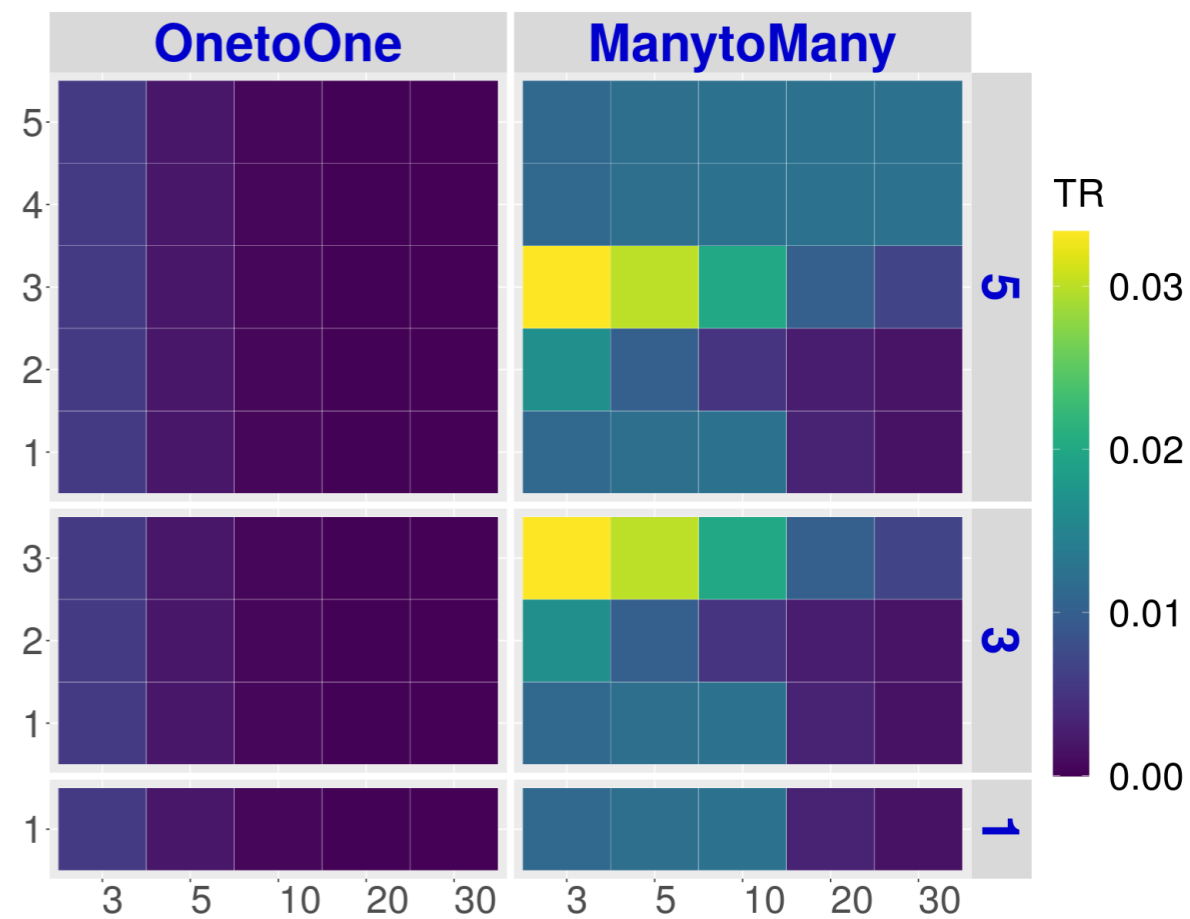

# Real Datasets

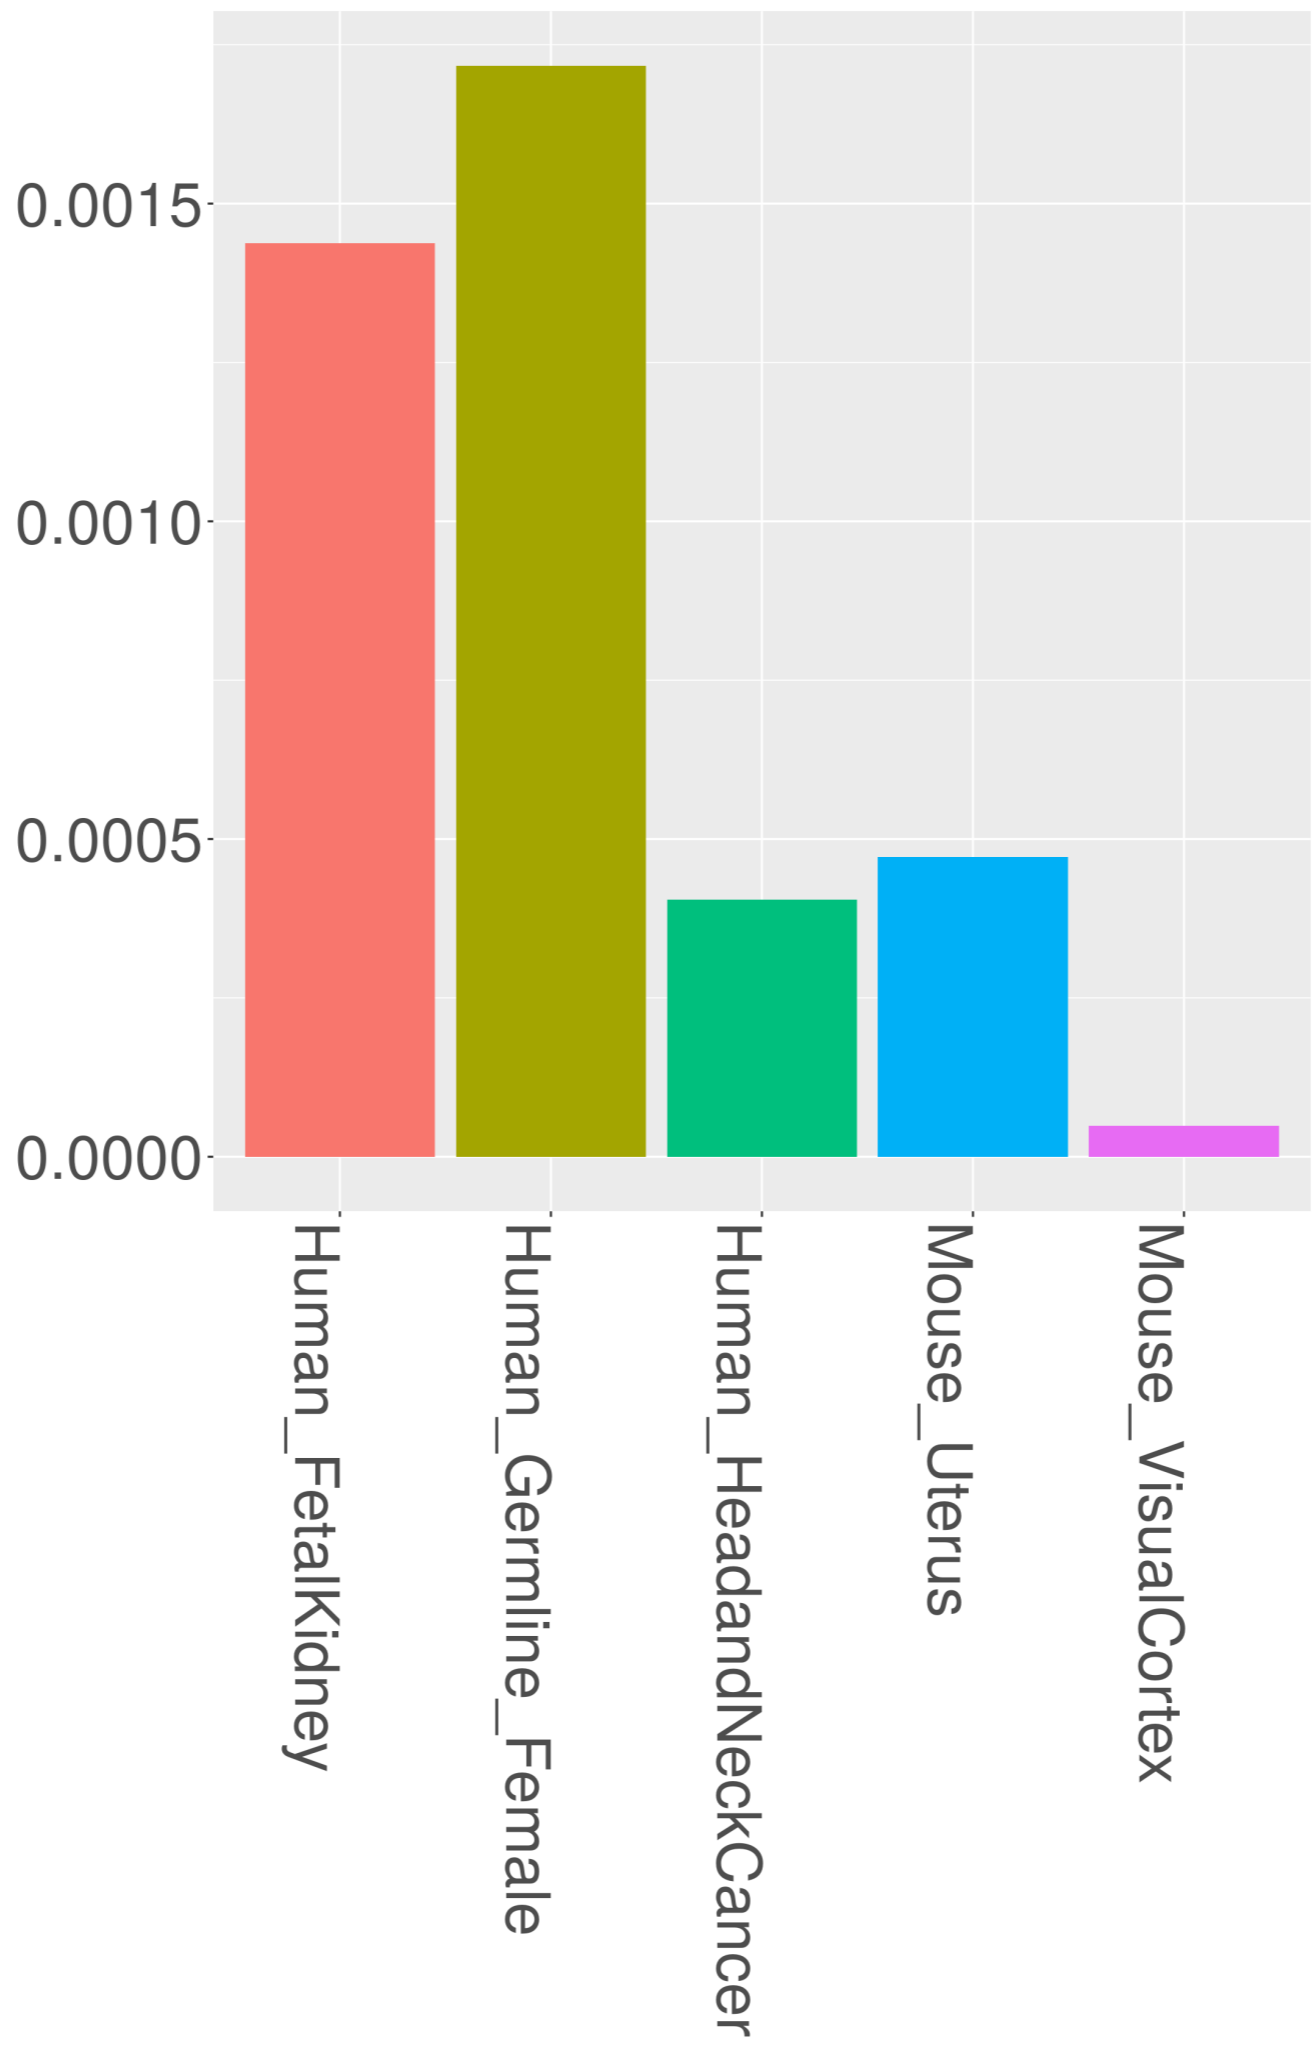

Supplement: 12859_2023_5490_MOESM12_ESM.pdf [file 12859_2023_5490_MOESM12_ESM.pdf]
